# Supplementary material
Source: PubMed Central journal article supplement (PMC8943709)

Supporting Information for:

A Synthesis of a Rationally Designed Inhibitor of Cytochrome P450 8B1, a Therapeutic Target  
to Treat Obesity

Eunhee Chung,<sup>2</sup> Samuel D. Offei,<sup>1</sup> U-Ter Aondo Jia,<sup>2</sup> Juan Estevez,<sup>2</sup> Yessenia Perez,<sup>2</sup> Hadi D.  
Arman,<sup>1</sup> and Francis K. Yoshimoto<sup>1</sup>

<sup>1</sup>Department of Chemistry and <sup>2</sup>Department of Kinesiology, The University of Texas at San  
Antonio (UTSA), One UTSA Circle, San Antonio, TX 78249-0698

*Steroids*, 2021, xxxxxx

## **Table of Contents**

1. Part 1: Figure S1: Summary of mice used for this study
2. Part 2: C12-Diiodide Conversion to the Vinyl Iodide Using AgOTf
3. Part 3: Solubilizing Compound **17** in NaOH/saline buffer (1% w/v)
4. Part 4:  $^1\text{H}$  NMR,  $^{13}\text{C}$  NMR, IR, HRMS, and optical rotation data of synthesized compounds
5. Part 5: X-Ray Structure of Compound **16** including Table S1

## **1. Part 1. Figure S1: Summary of mice used for this study**

Figure S1 below summarizes the results for treating mice with a high-fat and high-sucrose diet (HFHS) for 8 weeks. (CON: control, HFHS/UT: high-fat and high-sucrose diet, HFHS/OB: high-fat and high-sucrose diet with vehicle treatment that developed insulin resistance and obesity, HFHS/IR: high-fat and high-sucrose diet with vehicle treatment that developed insulin resistance but no obesity).

Panel (A) shows the body weight vs. the different groups, panel (B) shows the results for the glucose tolerance test through measurement of the area under the curve (AUC), panel (C) shows the blood glucose levels.

**1. Part 1. Figure S1: Summary of mice used for this study**

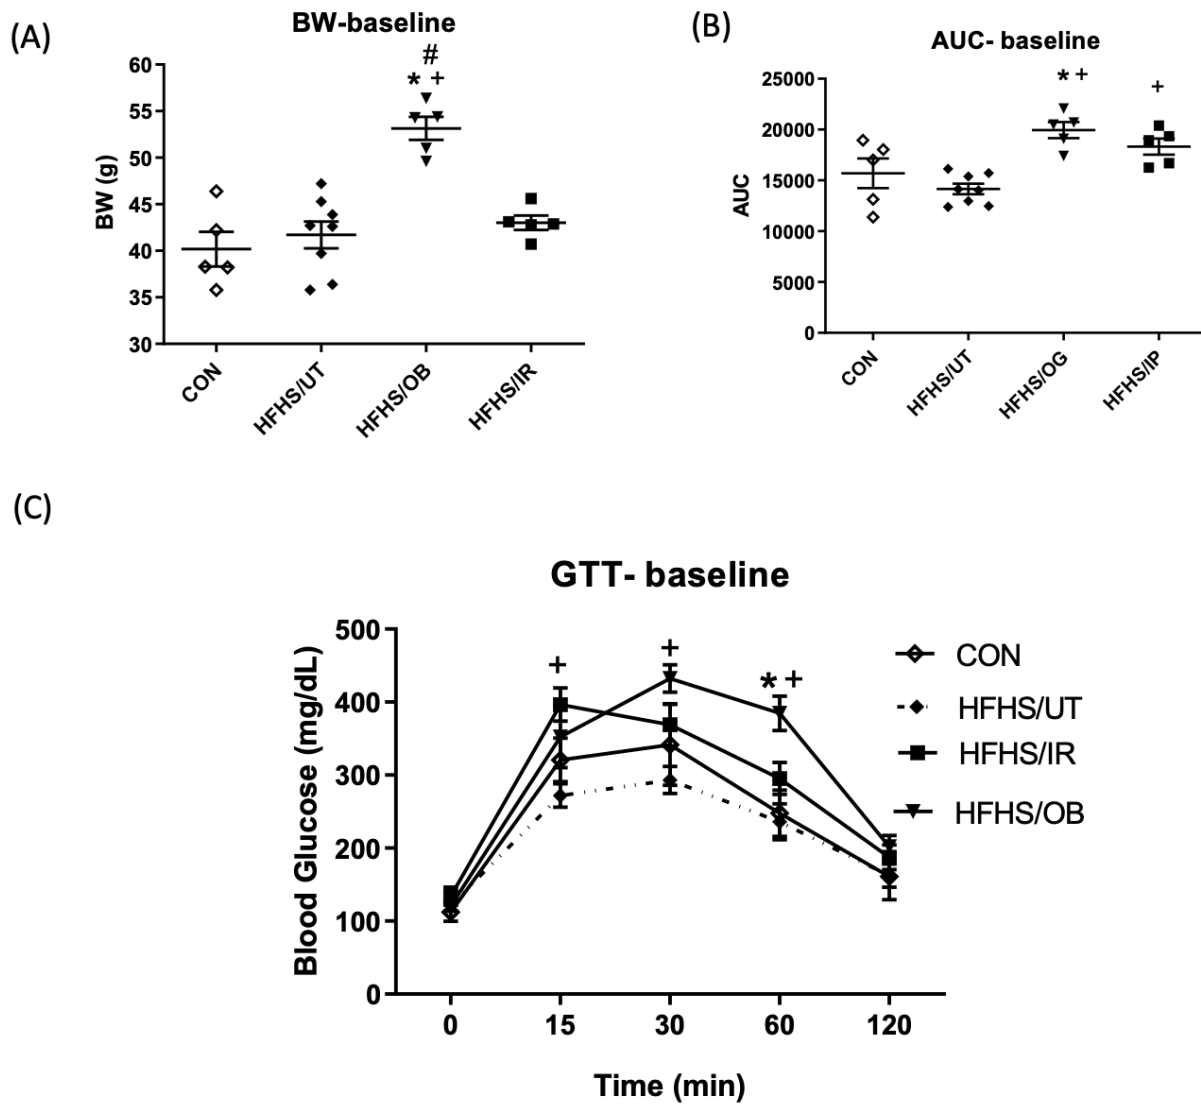

**Figure S1.** Effects of diet on BW and glucose tolerance tests. (A) Five mice out of 18 mice developed obesity after 8 weeks of HFHS feeding. (B) The area under the curve (AUC) of GTT and (C) glucose tolerance test (GTT). Blood glucose was measured right before glucose injection and 15, 30, 60, and 120 minutes after glucose injection. The HFHS/OB significantly increased AUC and impaired glucose clearance compared to the control (CON) group as well as HFHS/UT. The HFHS/IR mice developed insulin resistance compared to HFHS. \*  $P < 0.05$ , vs.

CON, + P < 0.05, vs. HFHS/UT, # p < 0.05 vs. HFHS/IR. CON, control diet indicated by a closed reversed triangle (▼); HFHS/UT, mice fed with a high-fat and a high-sucrose diet (HFHS) with no alterations of body weight or glucose tolerance test, indicated by closed diamond (◆); HFHS/OB, mice fed HFHS developed obesity and insulin resistance, indicated by a closed triangle (▲); HFHS/IR, mice fed HFHS developed insulin resistance without inducing obesity, indicated by a closed circle (●). The sample size for CON, HFHS/UT, HFHS/OB, and HFHS/IR are 5, 8, 5, and 5, respectively. Group differences were compared using one-way analysis of variance (ANOVA) or two-way ANOVA followed by Tukey's multiple comparisons tests. A p-value of < 0.05 was considered a significant difference. CON: control, HFHS: high fat high sucrose diet, UT: untreated, OB: mice that developed insulin resistance with obesity, IR: mice that developed insulin resistance without obesity.

## 2. Part 2: C12-Diiodide Conversion to the Vinyl Iodide Using AgOTf

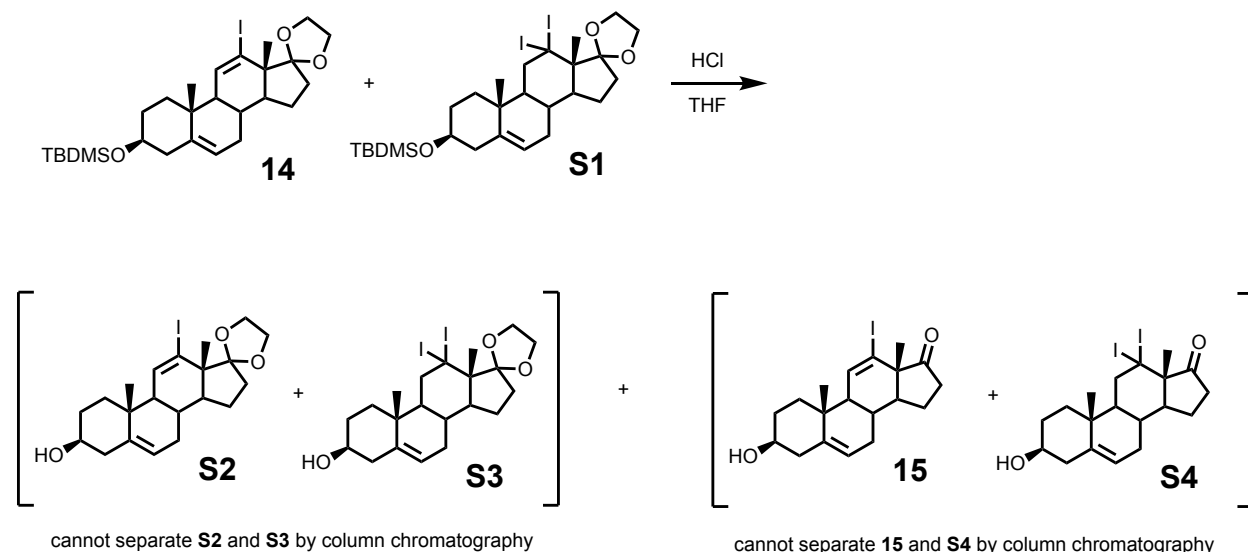

**Scheme S1. Deprotection of the C3-OTBDMS of the vinyl iodide/diiodide (14/S1) mixture.**

In a 500 ml round bottom flask containing the C3-OTBDMS C17-ketal for vinyl iodide-diiodide mixture (19.7 g, 0.0345 mol, 1 eq) in methanol: dichloromethane solution (300 ml, 1:2, v/v) was added para-toluenesulfonic acid (0.3 g, 1.7 mmol, 0.049 eq). The solution was stirred for 3 h. The reaction solution was diluted with dichloromethane (200 ml) and then quenched with the addition of saturated sodium bicarbonate (200 ml). The organic layer was separated from the aqueous layer and concentrated under reduced pressure to form a crude orange oil. The orange oil was purified by column chromatography (25% ethyl acetate in hexanes → 40% ethyl acetate in hexanes) to afford a mixture of the deprotected TBDMS group for both the ketal S2 co-eluting with the diiodide S3 and the ketone 15 also co-eluting with the diiodide S4 (total mass was about 12.5 g).

The conversion of the hydrazone (Scheme 1, **13**) to the vinyl iodide (**14**) gave a mixture of the vinyl iodide and diiodide (Scheme S1, **14** and **S1**). The vinyl iodide was not separable from the diiodide through silica gel column chromatography even after deprotection of the C3-TBDMS group. The following troubleshooting process resulted in the use of AgOTf to successfully convert the diiodide to vinyl iodide.

## 2. Part 2: C12-Diiodide Conversion to the Vinyl Iodide Using AgOTf

### Elimination of the diiodide to the vinyl iodide

### Potassium *tert*-butoxide treatment of the vinyl iodide-diiodide compound

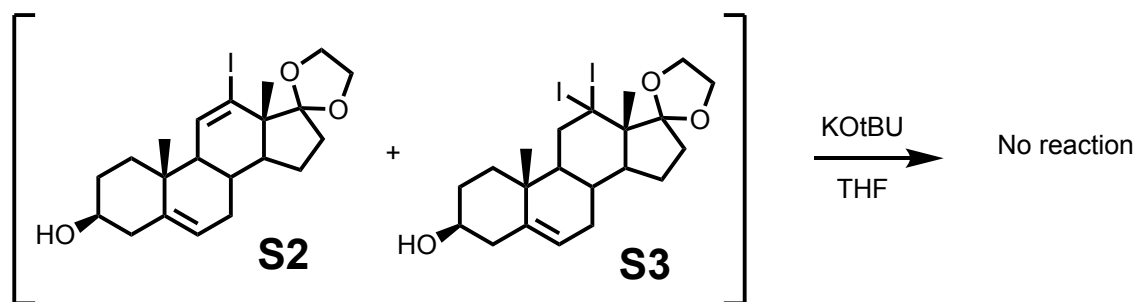

cannot separate **S2** and **S3** by column chromatography

### **Scheme S2. Failed attempt to eliminate the diiodide (S3) to the vinyl iodide (S2).**

In a screw cap vial containing the vinyl iodide-diiodide mixture (100 mg, 0.17 mmol, 1 eq) in THF (5 ml) was added potassium *tert*-butoxide (32 mg, 0.285 mmol, 1.6 eq). The mixture was stirred and aliquot NMRs were checked at 10 minutes and 45 minutes. The diiodide which is characterized by the dd at around 4.2 ppm did not disappear after 3 hr. The conversion of the diiodide to the vinyl iodide did not work with this reaction condition.



## 2. Part 2: C12-Diiodide Conversion to the Vinyl Iodide Using AgOTf

### Reflux conditions

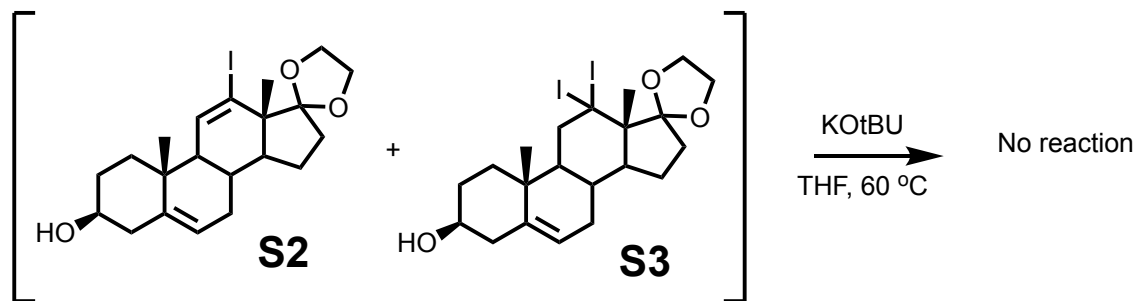

cannot separate **S2** and **S3** by column chromatography

**Scheme S3. Failed attempt to eliminate the diiodide (S3) to the vinyl iodide (S2) with potassium *tert*-butoxide in the presence of heat.**

To a 250 ml RBF containing the vinyl iodide-diiodide mixture (2.0 g, 3.43 mmol, 1 eq) and potassium *tert*-butoxide (0.32 g, 2.85 mmol, 0.83 eq) was added THF (100 ml). The reaction solution was refluxed for 12 h. The NMR of the reaction monitored subsequently and there was no conversion in the diiodide product to the vinyl-iodide.

## 2. Part 2: C12-Diiodide Conversion to the Vinyl Iodide Using AgOTf

Bottom row (blue) mixture of vinyl iodide and diiodide (at C12) used for reaction with potassium tert-butoxide and with DBU to possibly eliminate one of the iodines in the C12-diiodide to form the vinyl iodide (NMR spectra to show that the reactions failed even after heating). Middle row (red) aliquot of the reaction mixture with potassium tert-butoxide and heating. Top row (green) aliquot of the reaction mixture with DBU and heating. The doublet of doublet at  $\delta$  4.59 is gone after purification.

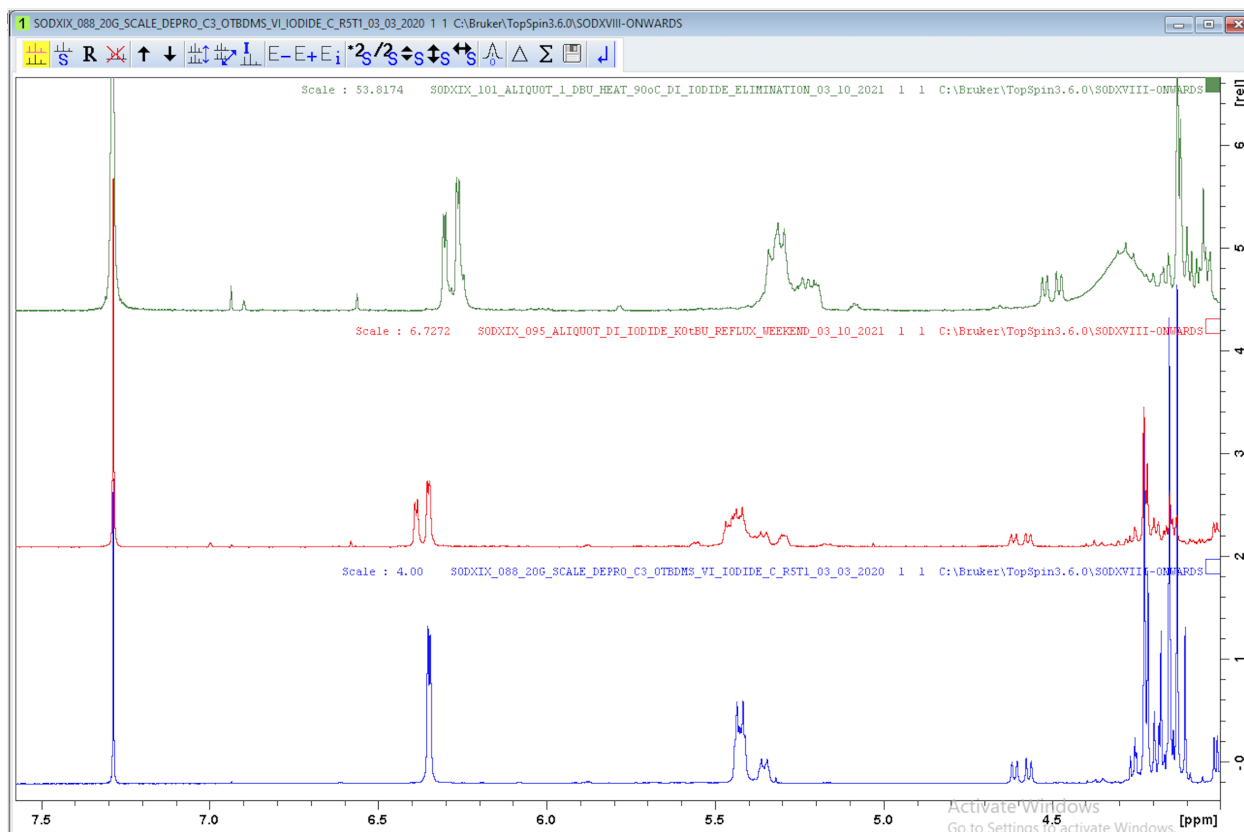

## 2. Part 2: C12-Diiodide Conversion to the Vinyl Iodide Using AgOTf

### Silver triflate treatment of the vinyl iodide-diiodide material

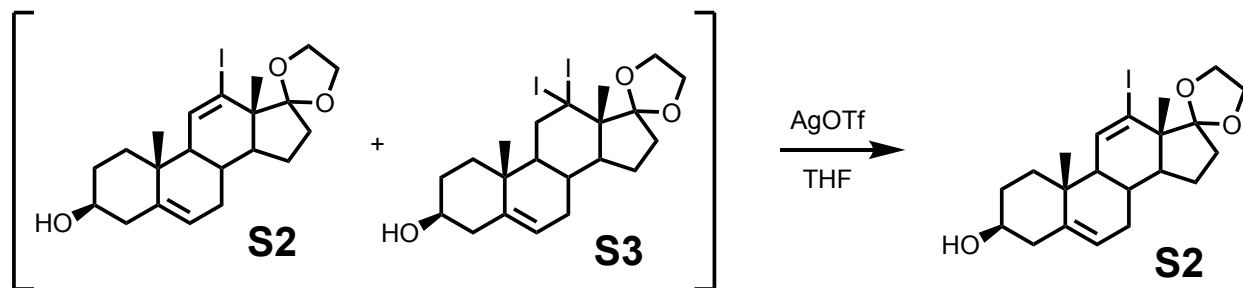

cannot separate **S2** and **S3** by column chromatography

### Scheme S4. Successful elimination of the diiodide (S3) to the vinyl iodide (S2).

To a solution of vinyl-iodide-diiodide (10.5 g, 0.018, 1 eq) in THF was added AgOTf (1 g, 3.89 mmol, 0.21 eq). The solution was stirred for 45 minutes. The conversion of the diiodide to the vinyl iodide was observed which was characterized by the disappearance of the “dd” at around 4.2 ppm. The reaction solution was filtered on a short column pad (100 % ethyl acetate) and concentrated under reduced pressure to afford the vinyl iodide product (10.4 g).

## 2. Part 2: C12-Diiodide Conversion to the Vinyl Iodide Using AgOTf

Bottom row (blue) mixture of vinyl iodide and diiodide (at C12) used for reaction with silver triflate. Middle row (red) crude reaction mixture. Top row (green) purified vinyl iodide product.

The doublet of doublet at  $\delta$  4.59 is gone after purification.

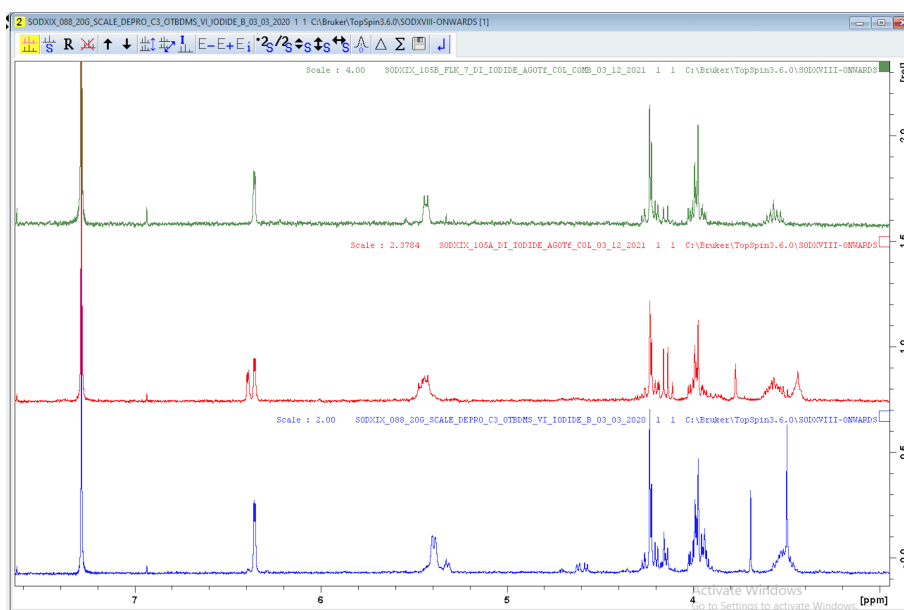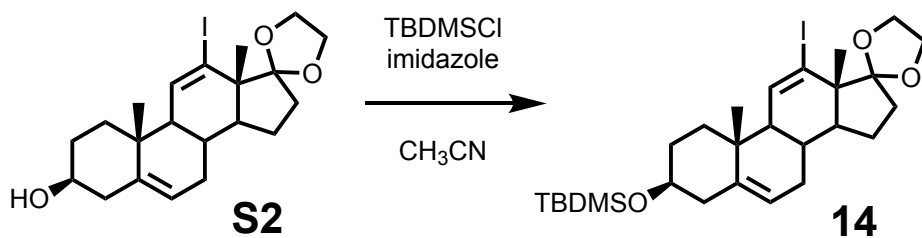

Scheme S5. Conversion of the pure vinyl iodide (**S2**) to compound **15**.

### 3. Part 3: Solubilizing Compound 17 in NaOH in saline buffer (1%, w/v)

For future studies in enhancing the solubility of the C12-pyridine containing inhibitor in aqueous media, the C3-hydroxy group was protected as the succinate.

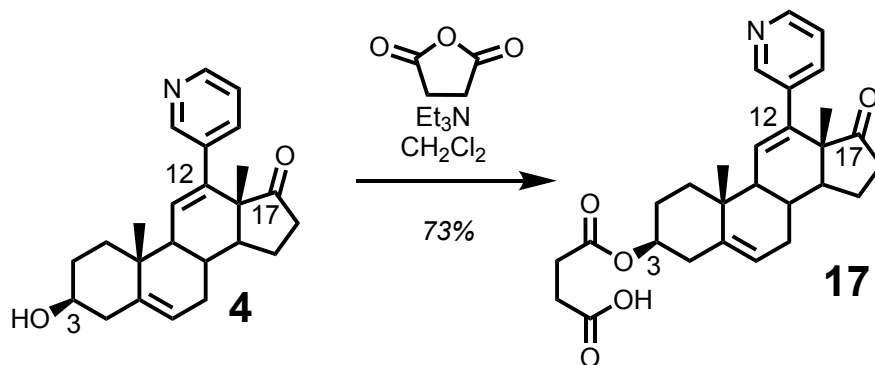

A saline stock solution was made separately (solution A: 0.25 g of NaCl and 0.25 g of  $\text{NaHCO}_3$  in 24 ml of deionized water) from NaOH 10%, w/v, solution (solution B: 1 g NaOH in 10 ml of deionized water). The 1% NaOH (w/v) solution in saline buffer was made by mixing solution A and solution B (9 to 1, v/v) to make solution C.

Solution C (200  $\mu\text{L}$ ) was added to the succinate (12.6 mg) and left to sit on the benchtop after the solid dissolved in the solution over a period of 5 minutes.

The dissolved succinate remained on the benchtop for 1 hour in solution (63 mg/ml concentration):

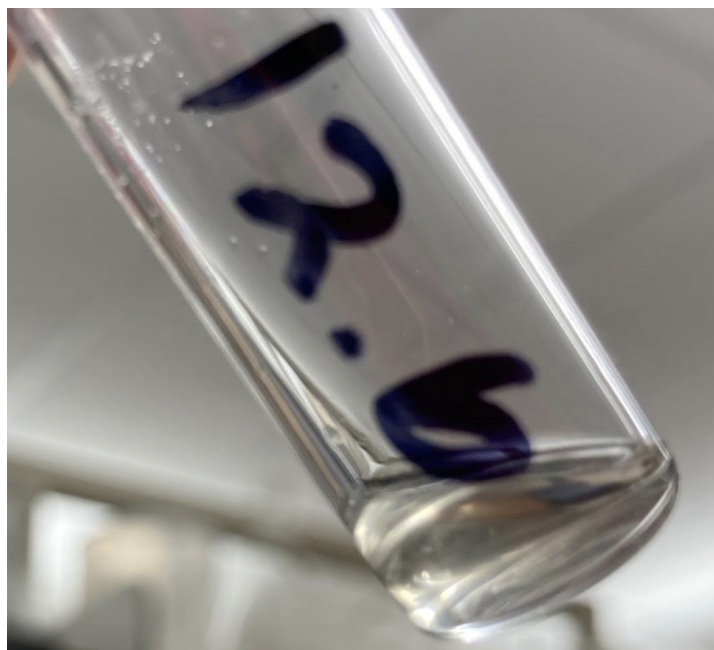

4. Part 4:  $^1\text{H}$  NMR,  $^{13}\text{C}$  NMR, IR, HRMS, and optical rotation data of synthesized compounds

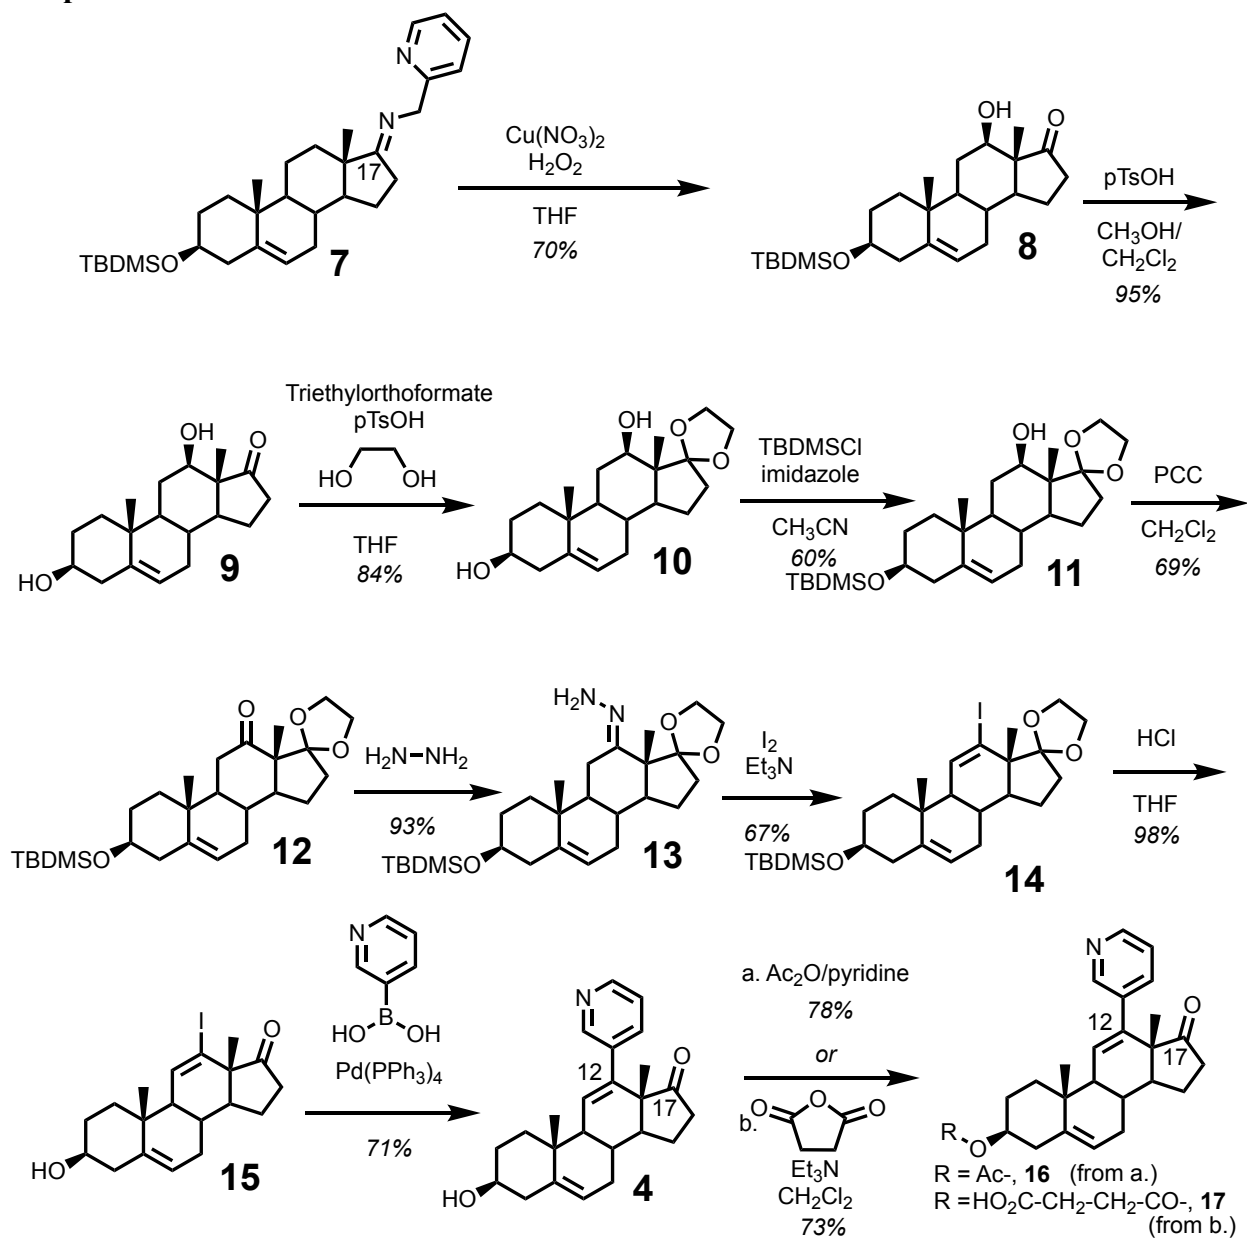

Scheme S6. Synthesized compounds presented in the main text.

Current Data Parameters  
 Name: S65MX184 PURE SPYR INHIBITOR 01 2022  
 Date: 20210407  
 Time: 21:44 h  
 INSTRUM: spect  
 PROBHD: 2143298\_0003 ( 2930  
 PULPROG: 32768  
 TD: 32768  
 SOLVENT: CDCl3  
 NS: 8  
 DS: 0  
 SWH: 10000.000 Hz  
 FIDRES: 0.610352 Hz  
 AQ: 1.6384000 sec  
 RG: 91.16  
 DW: 50.000 usec  
 DE: 6.50 usec  
 TE: 298.2 K  
 D1: 1.00000000 sec  
 TDO: 1  
 SFO1: 500.1330883 MHz  
 NUC1: 1H  
 P0: 3.83 usec  
 P1: 11.50 usec  
 PLW1: 9.90830040 W

F2 - Processing parameters  
 SI: 65536  
 SF: 500.1300120 MHz  
 WDW: no  
 SSB: 0  
 LB: 0 Hz  
 GB: 0  
 PC: 1.00

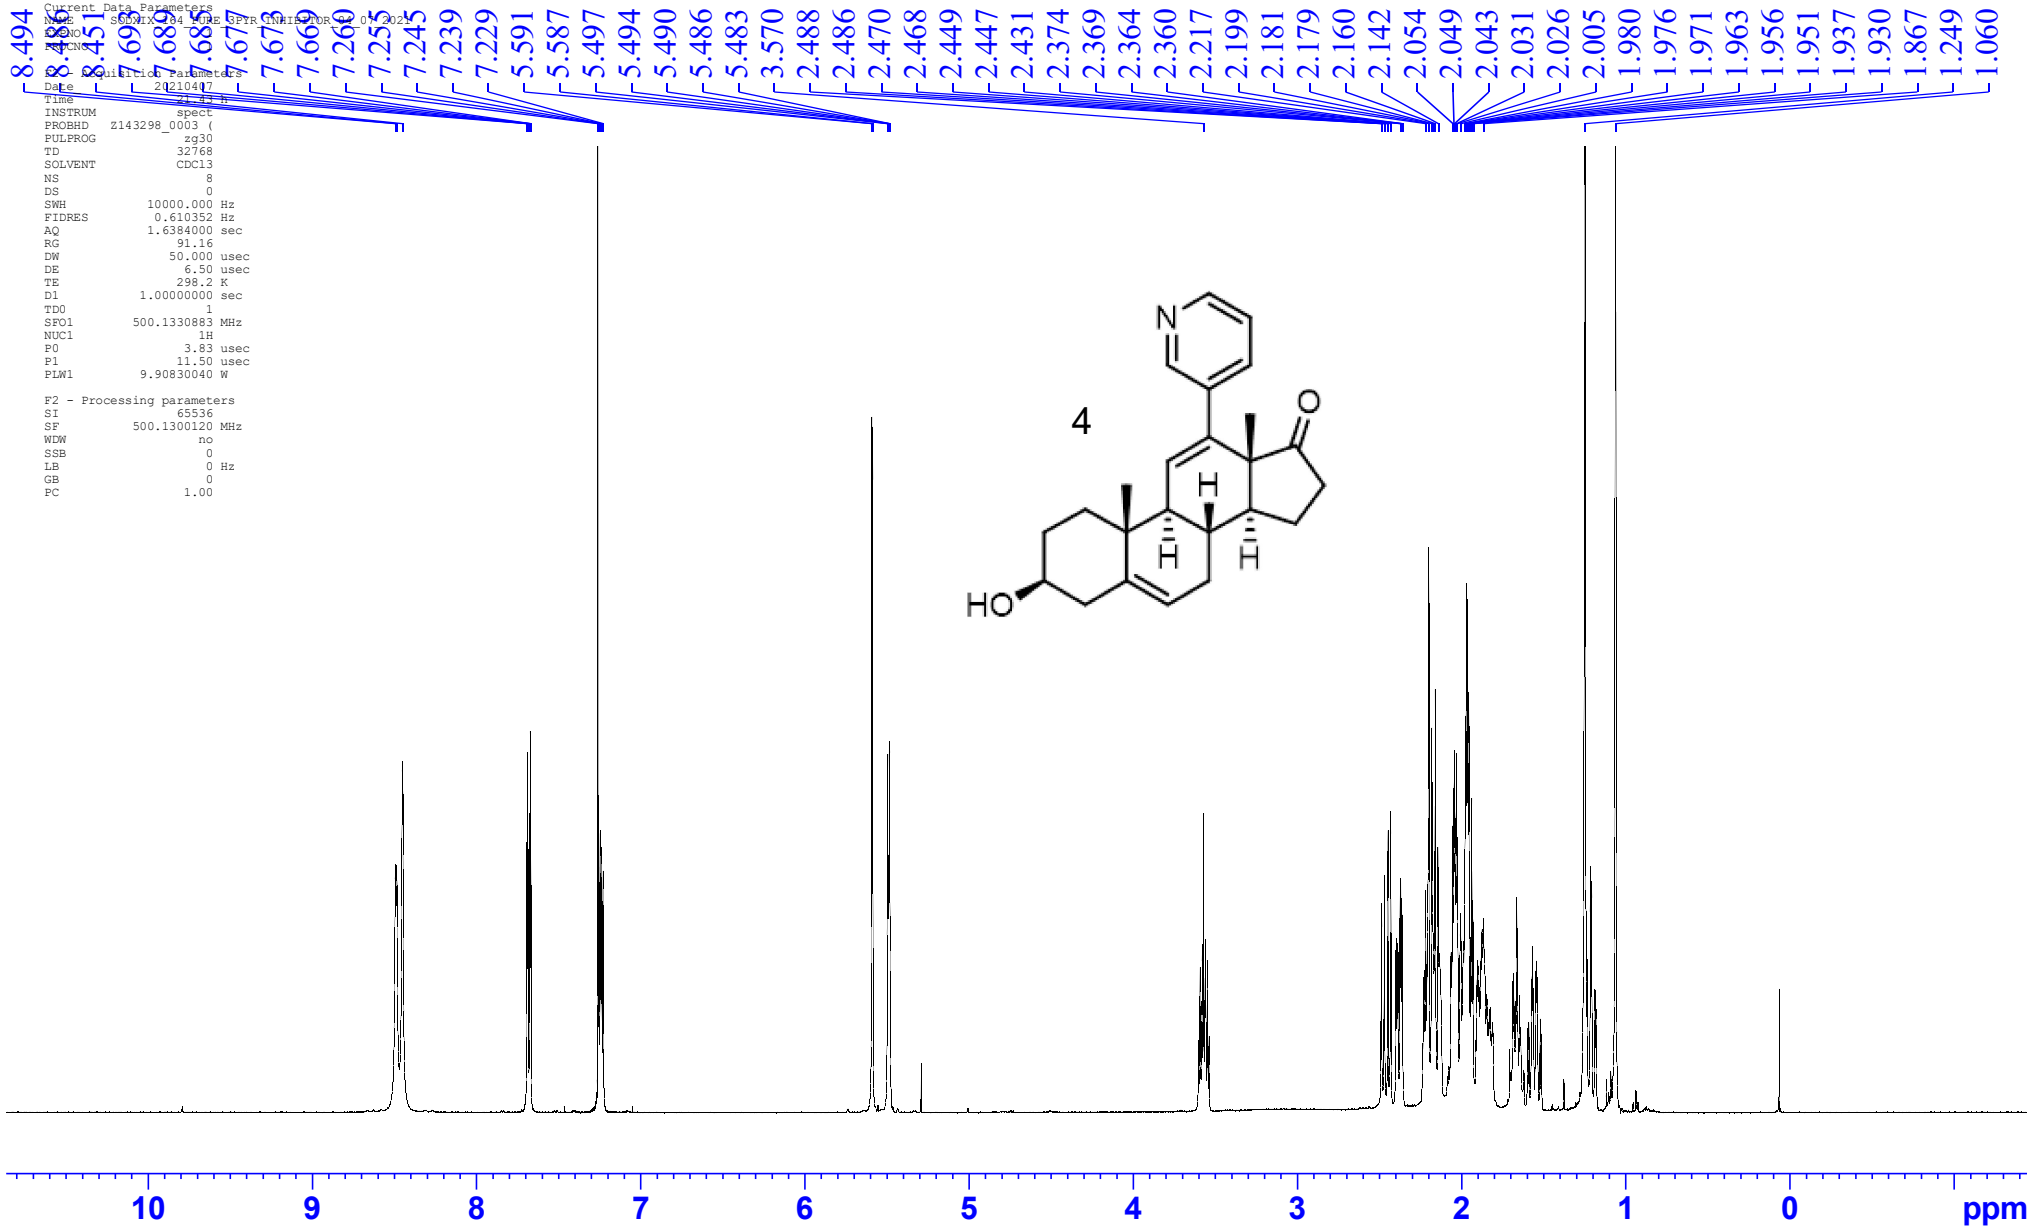

Integration values (from left to right): 1.93, 0.94, 0.88, 0.98, 0.97, 1.00, 1.05, 1.05, 3.12, 1.99, 3.30, 2.17, 1.05, 1.02, 3.20, 1.01, 2.91

Peak list (ppm): 8.494, 8.451, 7.693, 7.689, 7.683, 7.677, 7.673, 7.669, 7.260, 7.255, 7.245, 7.239, 7.229, 5.591, 5.587, 5.497, 5.494, 5.490, 5.486, 5.483, 3.570, 2.488, 2.486, 2.470, 2.468, 2.449, 2.447, 2.431, 2.374, 2.369, 2.364, 2.360, 2.217, 2.199, 2.181, 2.179, 2.160, 2.142, 2.054, 2.049, 2.043, 2.031, 2.026, 2.005, 1.980, 1.976, 1.971, 1.963, 1.956, 1.951, 1.937, 1.930, 1.867, 1.249, 1.060

215.15

Current Data Parameters  
NAME SODXIX\_164\_PURE\_3PYR\_INHIBITOR\_04\_07\_2021  
EXNO 2  
PROCNO 1

F2 - Acquisition Parameters

Date 20210407  
Time 22.25 h  
INSTRUM spect  
PROBHD Z143298\_0003 ( udeflt  
PULPROG TD 21424  
SOLVENT CDCl3  
NS 512  
DS 0  
SWH 29761.904 Hz  
FIDRES 2.778370 Hz  
AQ 0.3599232 sec  
RG 185.92  
DW 16.800 usec  
DE 8.31 usec  
TE 298.1 K  
D1 4.0000000 sec  
D12 0.0002000 sec  
D20 20.0000000 sec  
TD 4  
SF01 125.7703643 MHz  
NUC1 13C  
P1 18.25 usec  
P13 2000.00 usec  
P26 500.00 usec  
PLM1 115.08000183 W  
SPNAM[5] Crp60comp.4  
SPOAL5 0.500  
SPOFFS5 0 Hz  
SPW5 58.56200027 W  
SPNAM[8] Crp60,0.5,20.1  
SPOAL8 0.500  
SPOFFS8 0 Hz  
SPW8 58.56200027 W  
SFO2 500.1320005 MHz  
NUC2 1H  
CPDPRG[2] waltz16  
PCPD2 80.00 usec  
PLM2 9.90830040 W  
PLW12 0.20475000 W

F2 - Processing parameters

SI 131072  
SF 125.7577735 MHz  
WDW EM  
SSB 0  
LB 2.00 Hz  
GB 0  
PC 1.40

148.97  
147.55  
142.07  
141.95  
136.96  
136.67  
130.19  
122.32  
121.46

77.41  
77.16  
76.90  
71.72

54.15  
50.90  
49.26  
42.30  
37.85  
36.84  
36.70  
31.45  
30.52  
29.94  
20.46  
19.81  
19.46

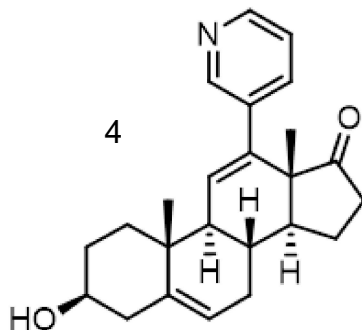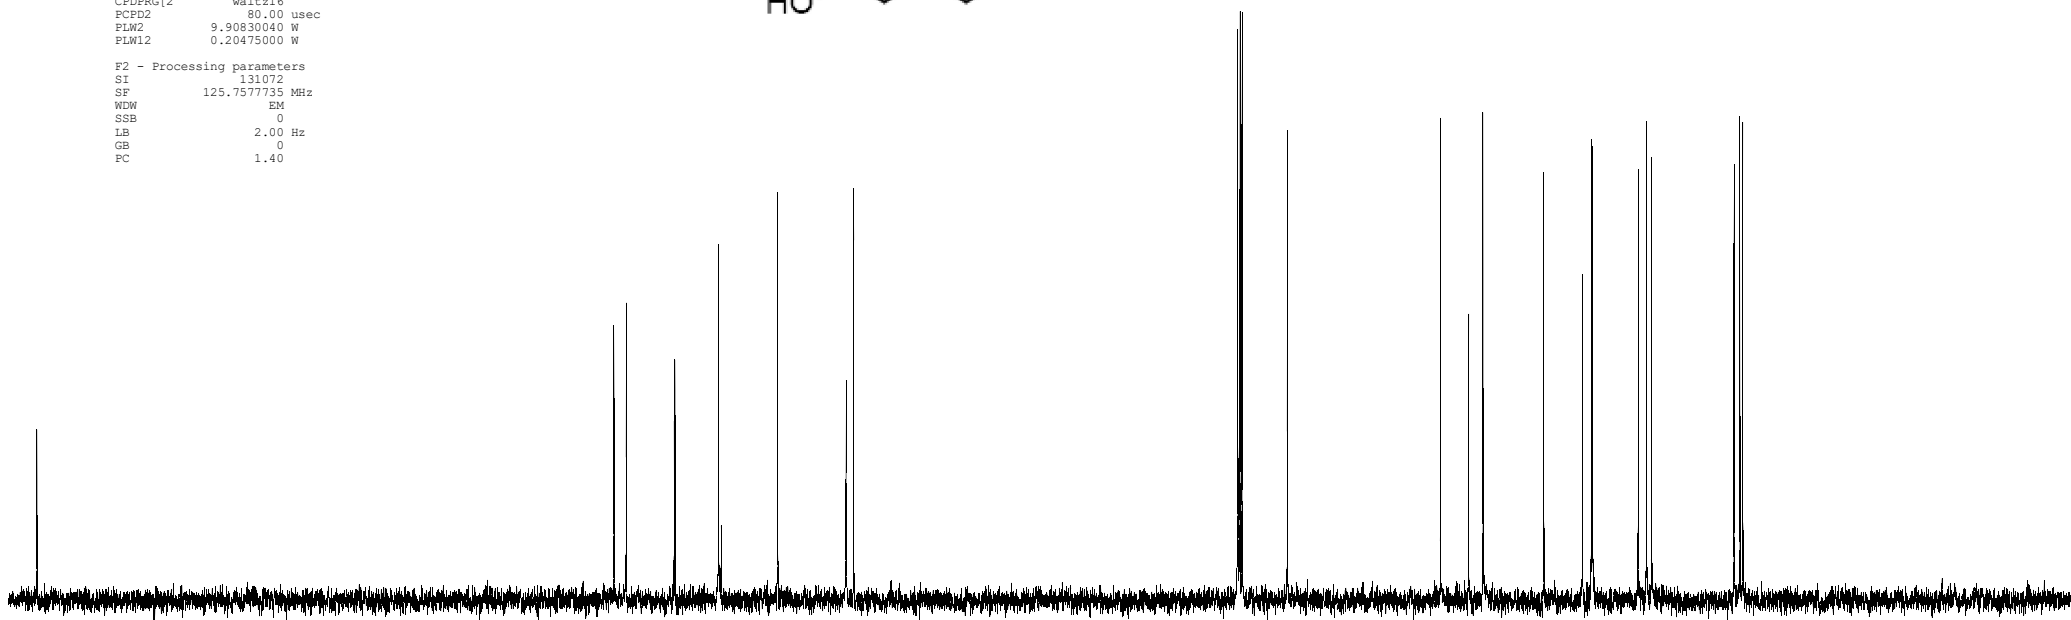

210 200 190 180 170 160 150 140 130 120 110 100 90 80 70 60 50 40 30 20 10 0 ppm



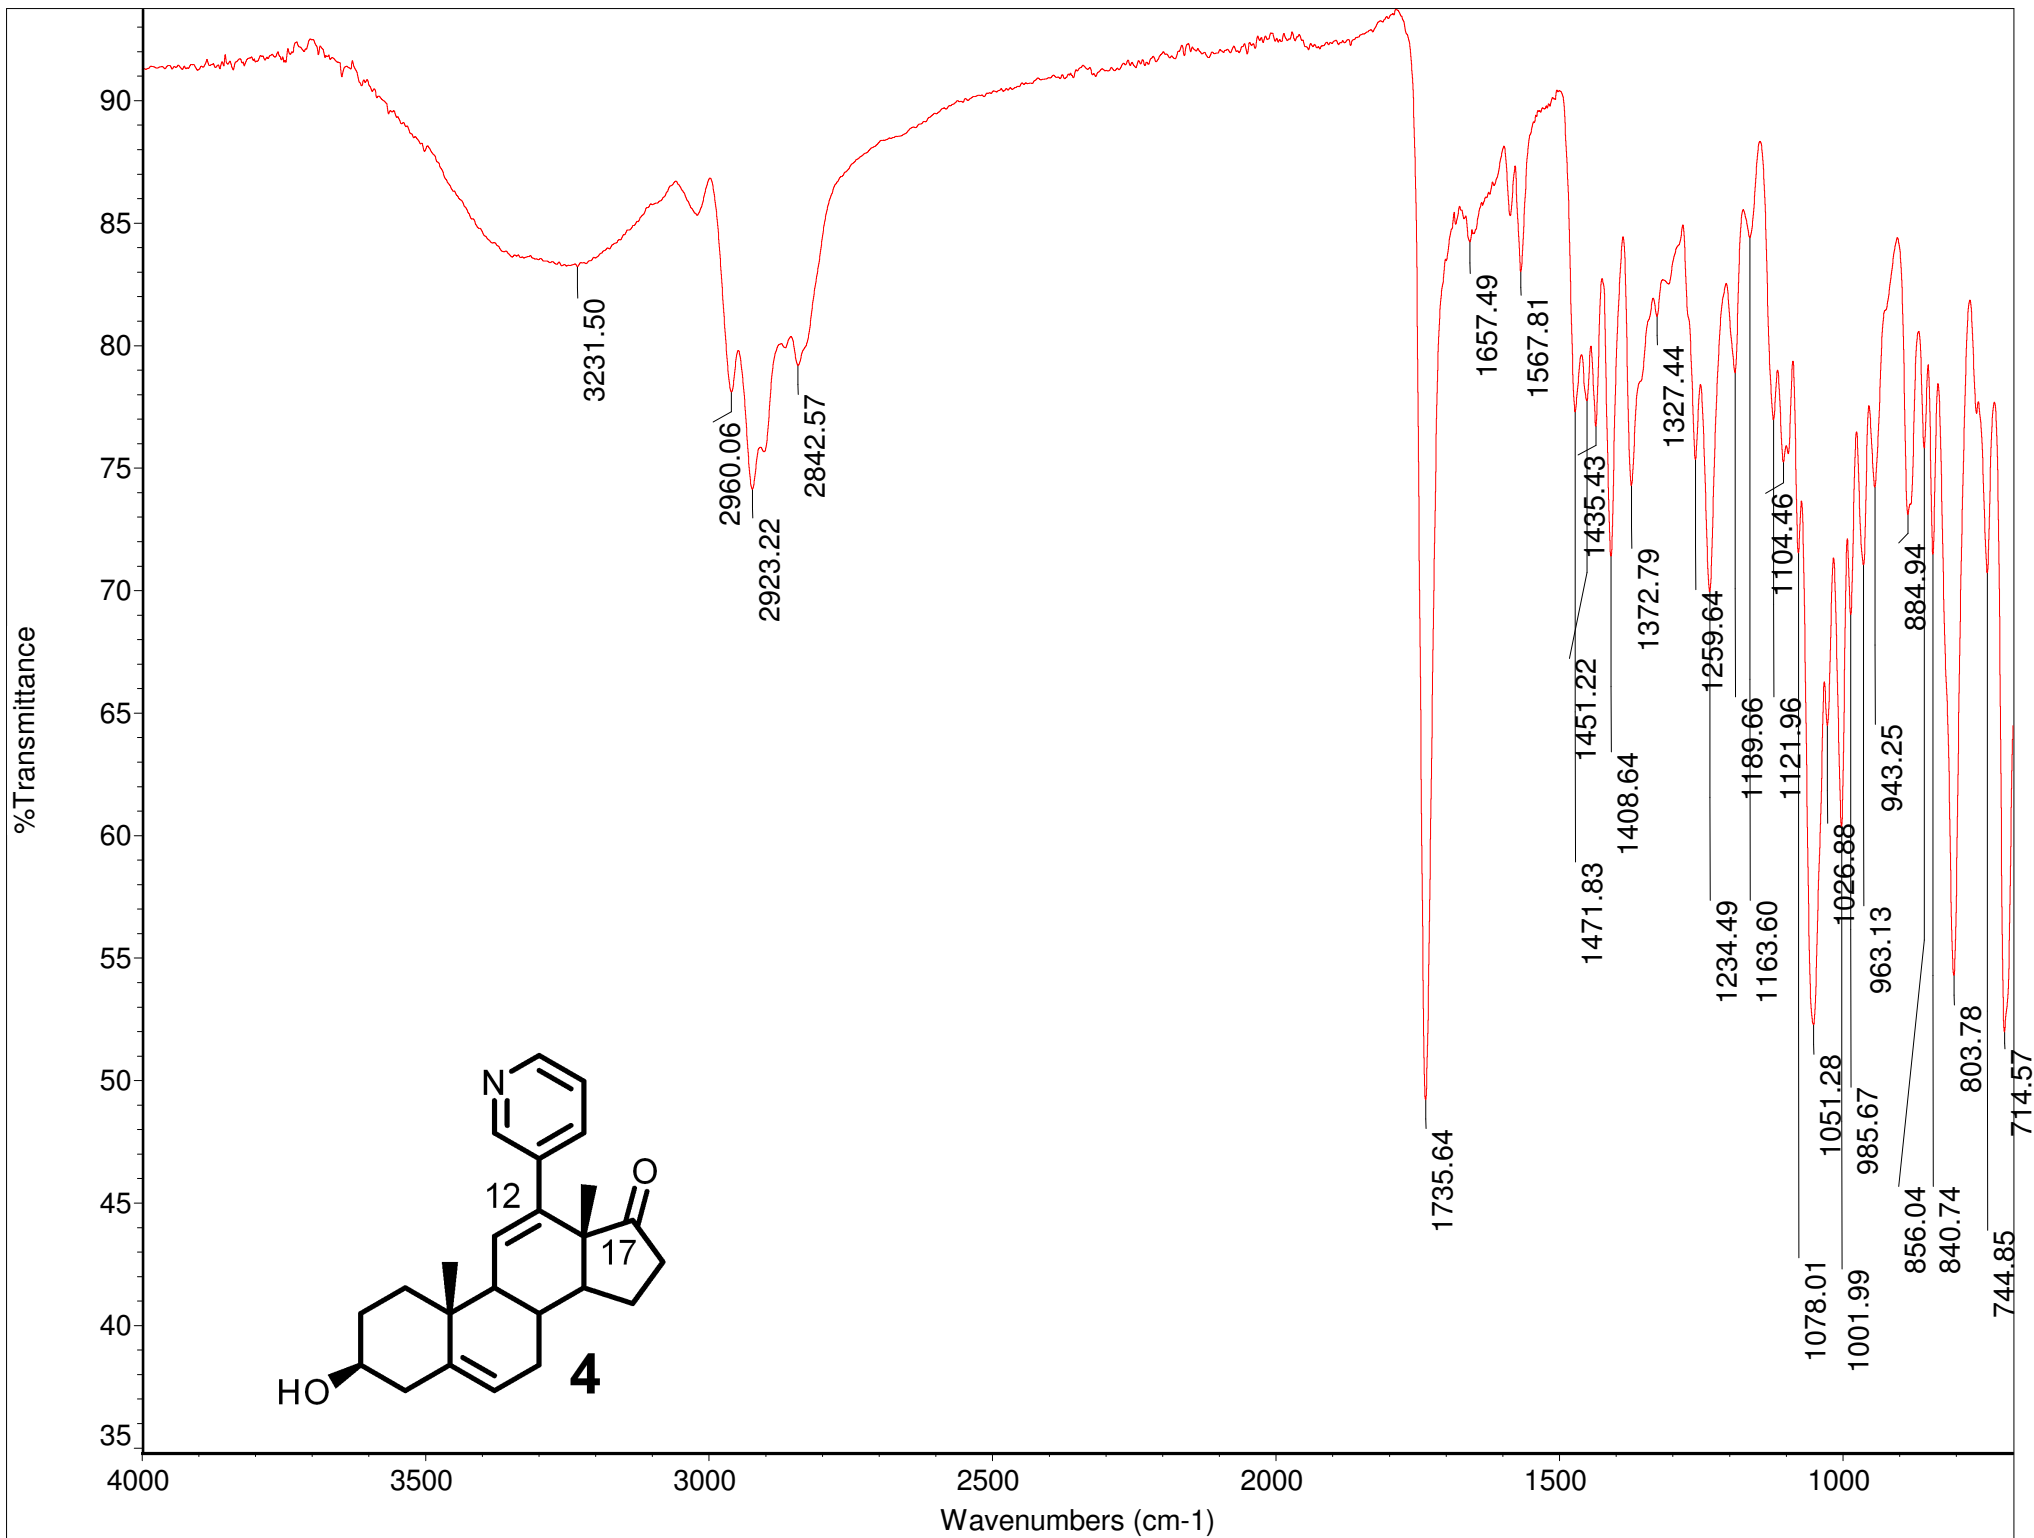

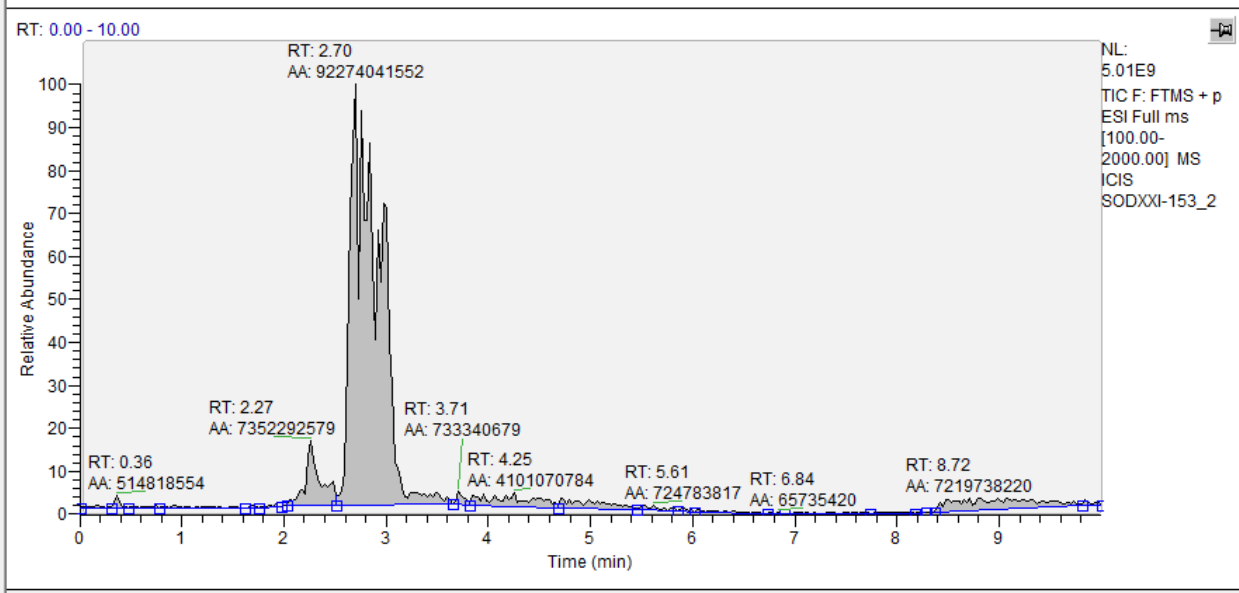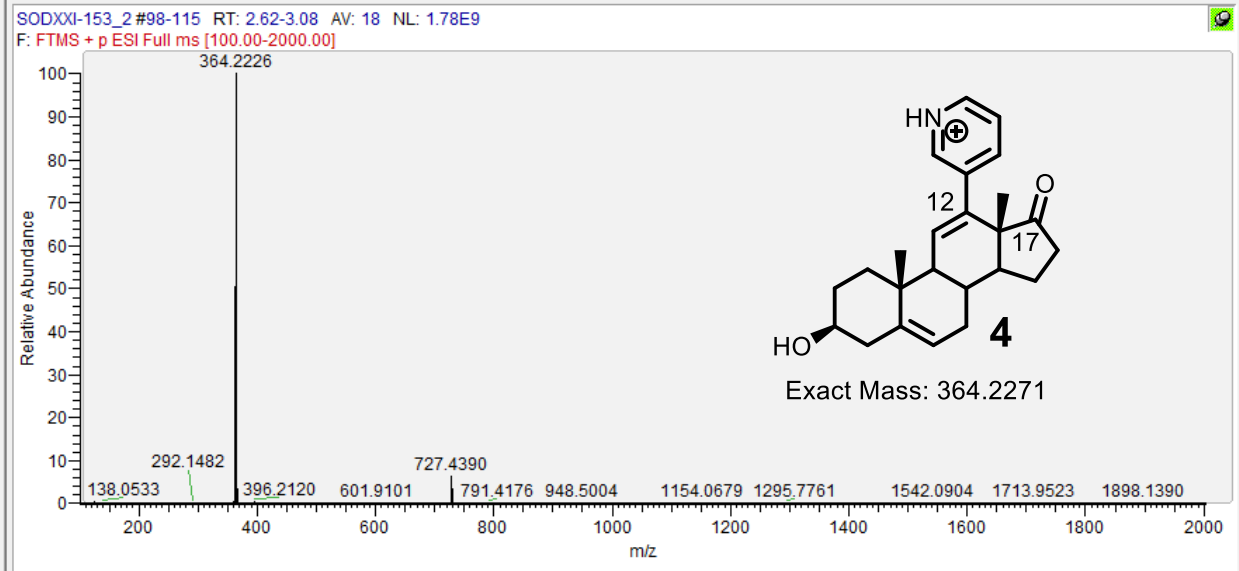

LAXCO

Optical Rotation

2021-10-03  
09:33:01

Original O.R. : -0.082°

O.R. °

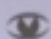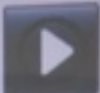**-0.082**0.2  
10-03 09:29  
ZERO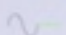

Temp. : 21.5°C ↓ 21.5°C

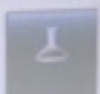

| WLG    | Cell     | ATC  |
|--------|----------|------|
| 280.44 | 1.0000cm | 20.0 |

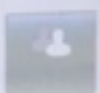

GLP

Off

SYSTEM

METHOD

LABUSE

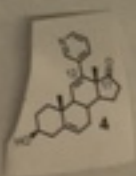

13.7mg

---

10 ml

-0.082

Current Data Parameters

NAME SODXXI\_153\_C12B\_OH\_PDT [1H 13C]\_10\_03\_2021  
PROCNO 1  
PROBHD zg30  
PULPROG zg30  
TD 32768  
SOLVENT CDCl3  
NS 8  
DS 0  
SWH 10000.000 Hz  
FIDRES 0.610352 Hz  
AQ 1.6384000 sec  
RG 28.76  
DW 50.000 usec  
DE 10.00 usec  
TE 298.2 K  
D1 1.00000000 sec  
TDO 1  
SFO1 500.1330883 MHz  
NUC1 1H  
PO 4.27 usec  
P1 12.81 usec  
PLW1 19.99900055 W

F2 - Processing parameters

SI 65536  
SF 500.1300123 MHz  
WDW EM  
SSB 0  
LB 0.30 Hz  
GB 0  
PC 1.00

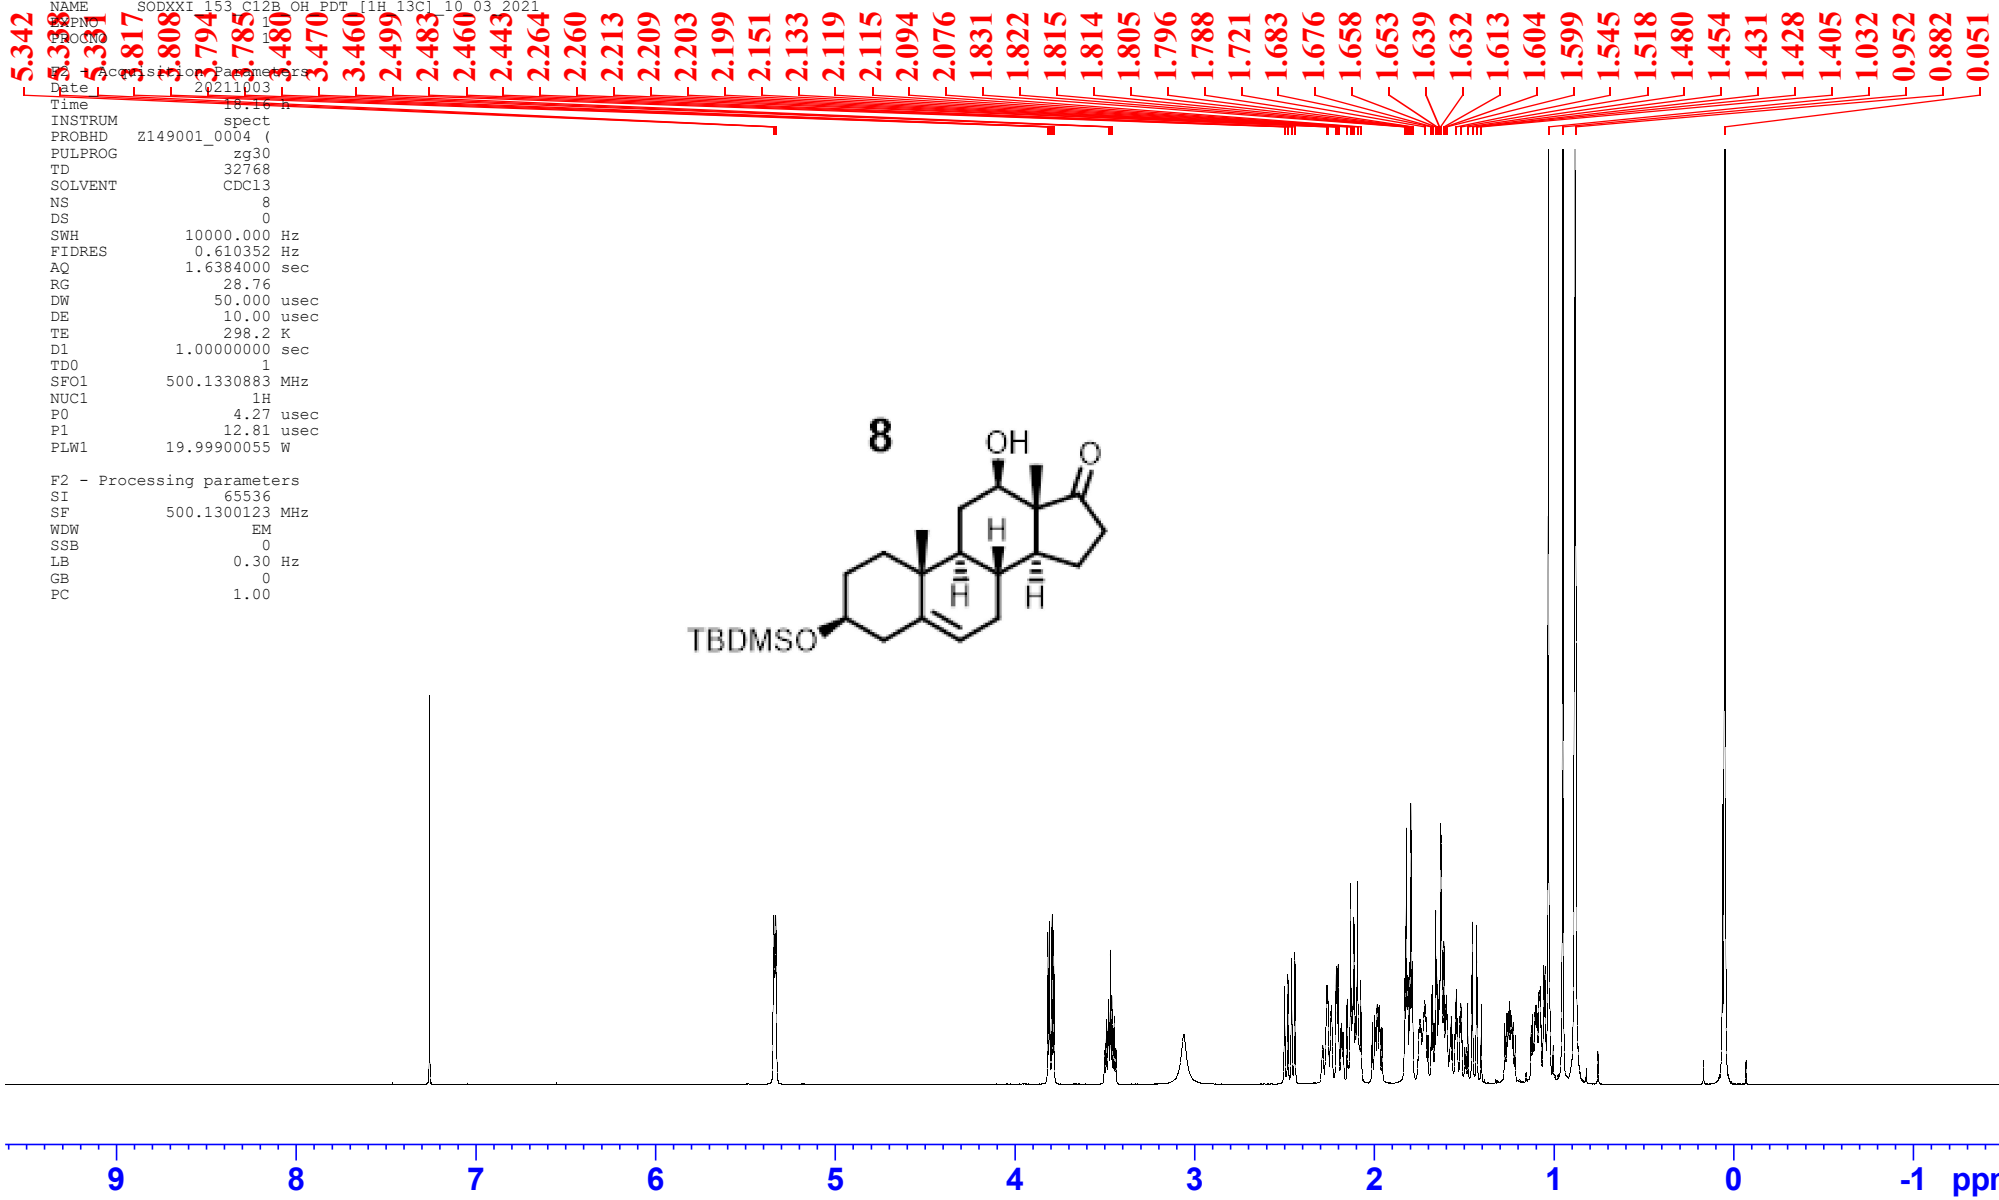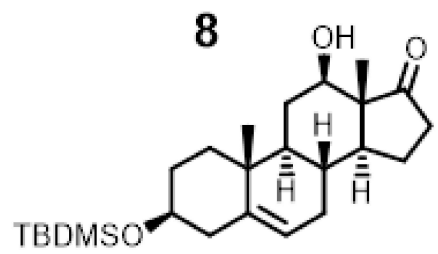

5.342  
5.338  
5.331  
5.317  
5.308  
5.294  
5.285  
5.278  
5.270  
5.264  
5.260  
5.253  
5.249  
5.243  
5.236  
5.230  
5.223  
5.219  
5.215  
5.209  
5.203  
5.199  
5.191  
5.185  
5.181  
5.176  
5.172  
5.168  
5.167  
5.166  
5.158  
5.153  
5.139  
5.132  
5.131  
5.113  
5.104  
5.099  
5.095  
5.088  
5.082  
5.051  
0.051

1.00  
1.02  
1.01  
0.87  
1.02  
4.14  
1.06  
1.76  
6.89  
1.16  
1.66  
3.50  
3.11  
9.13  
6.14

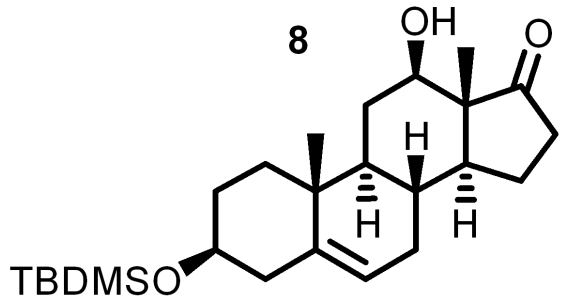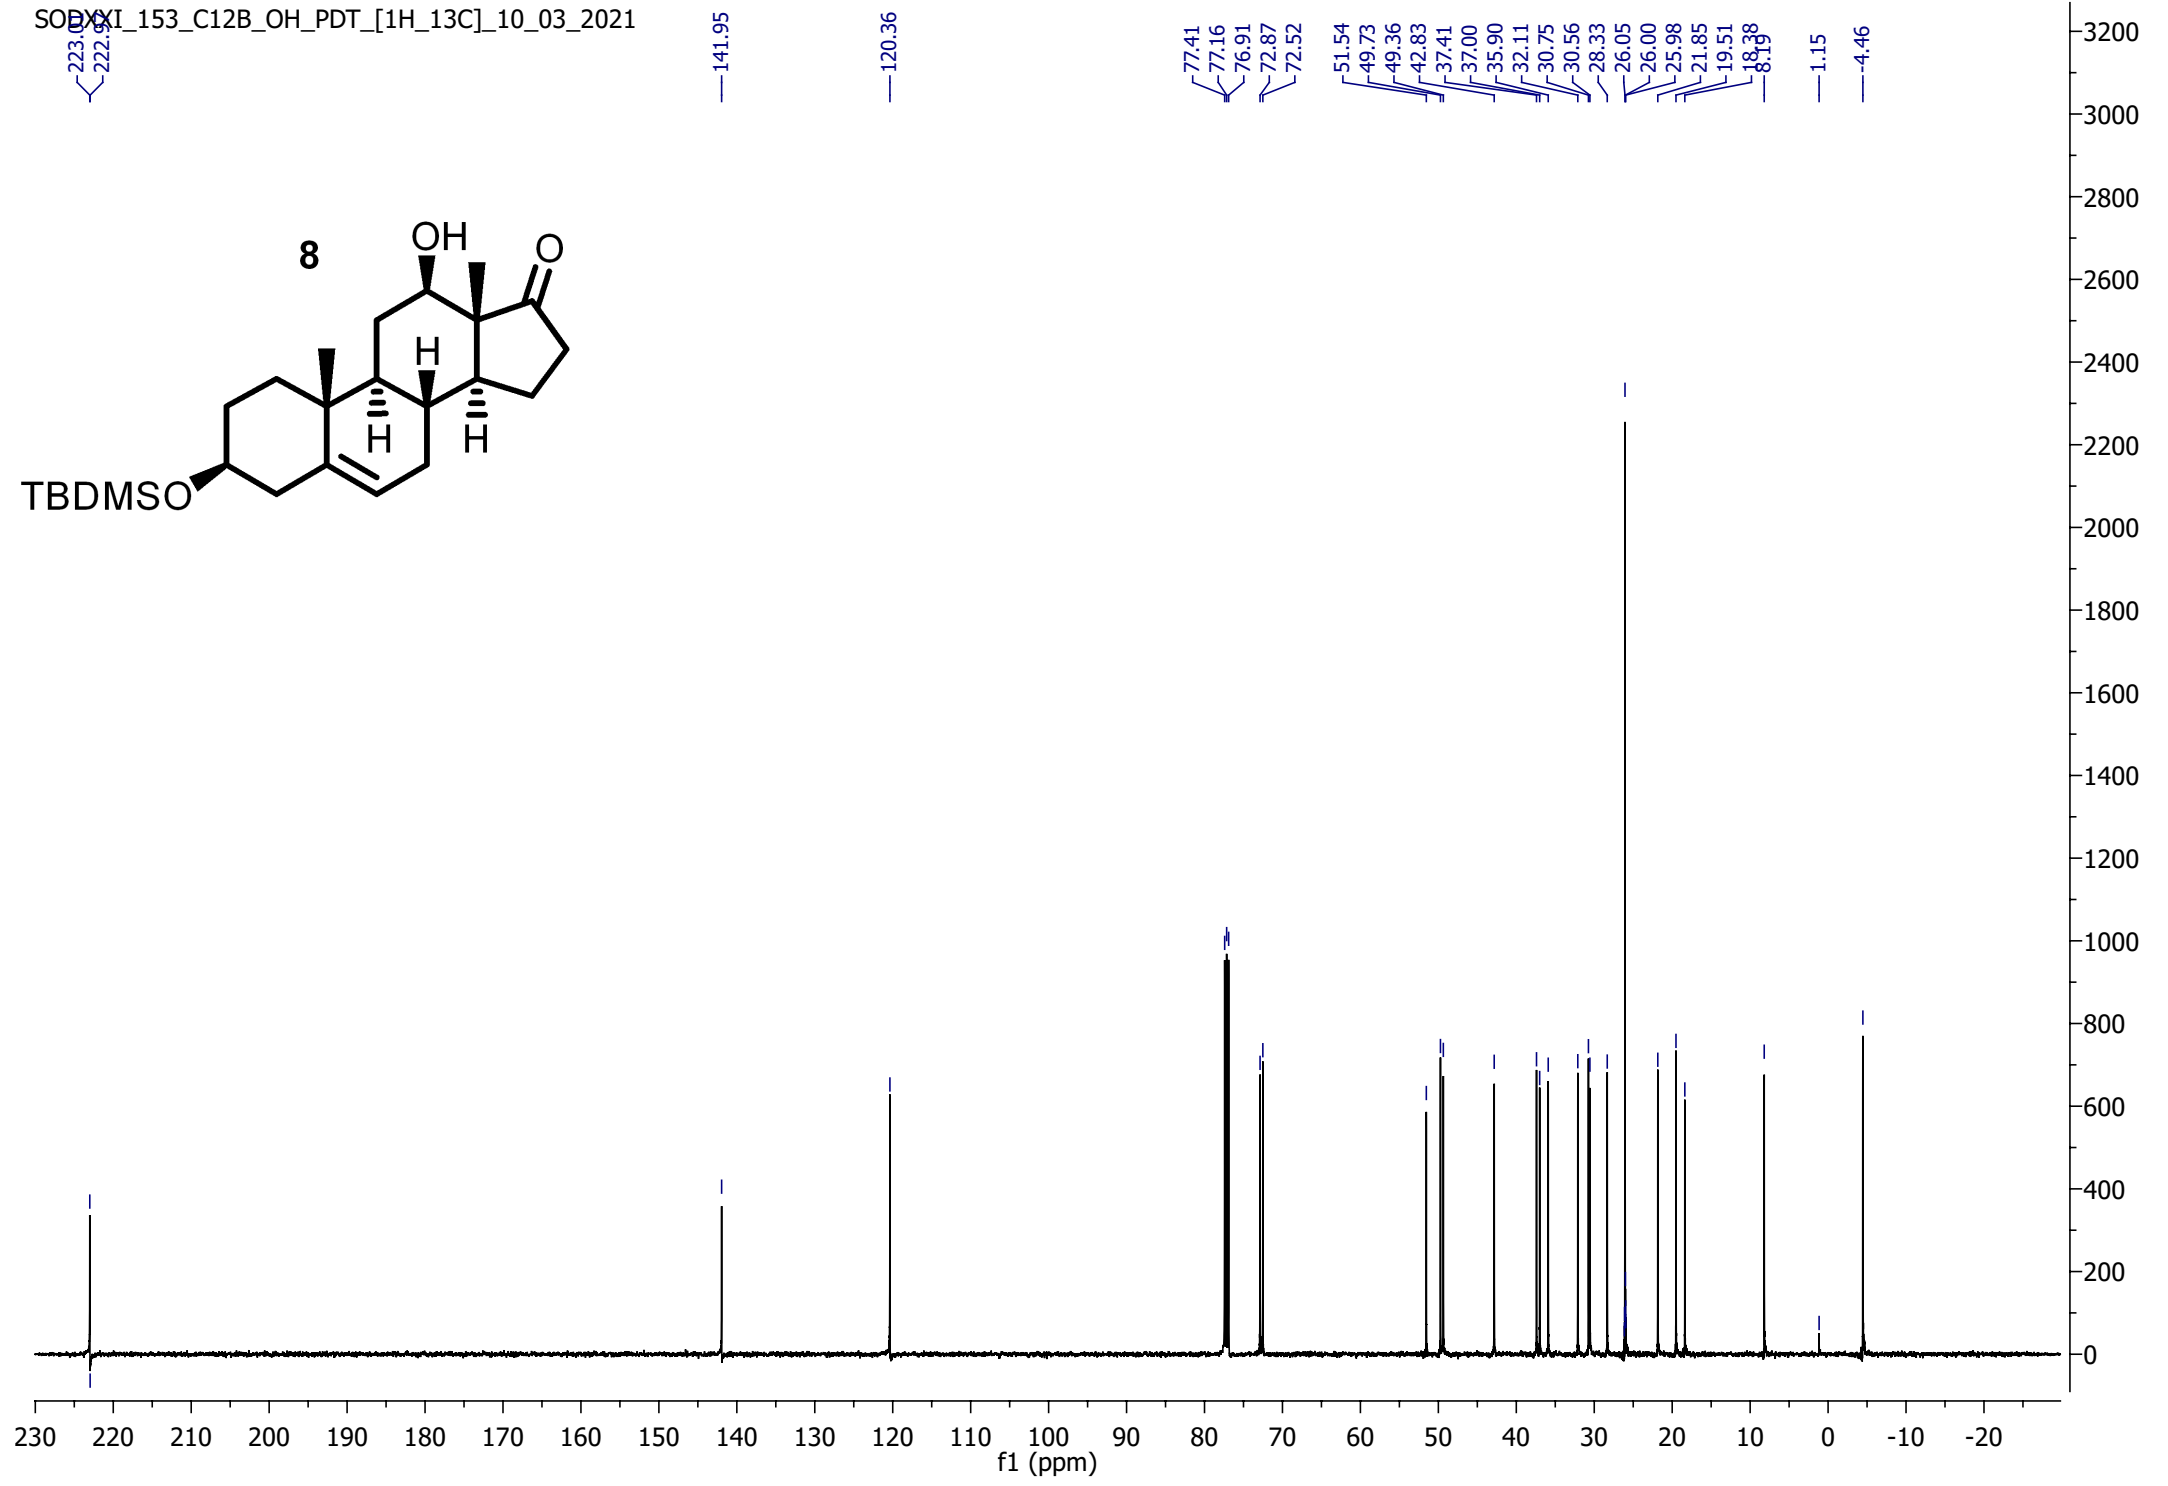

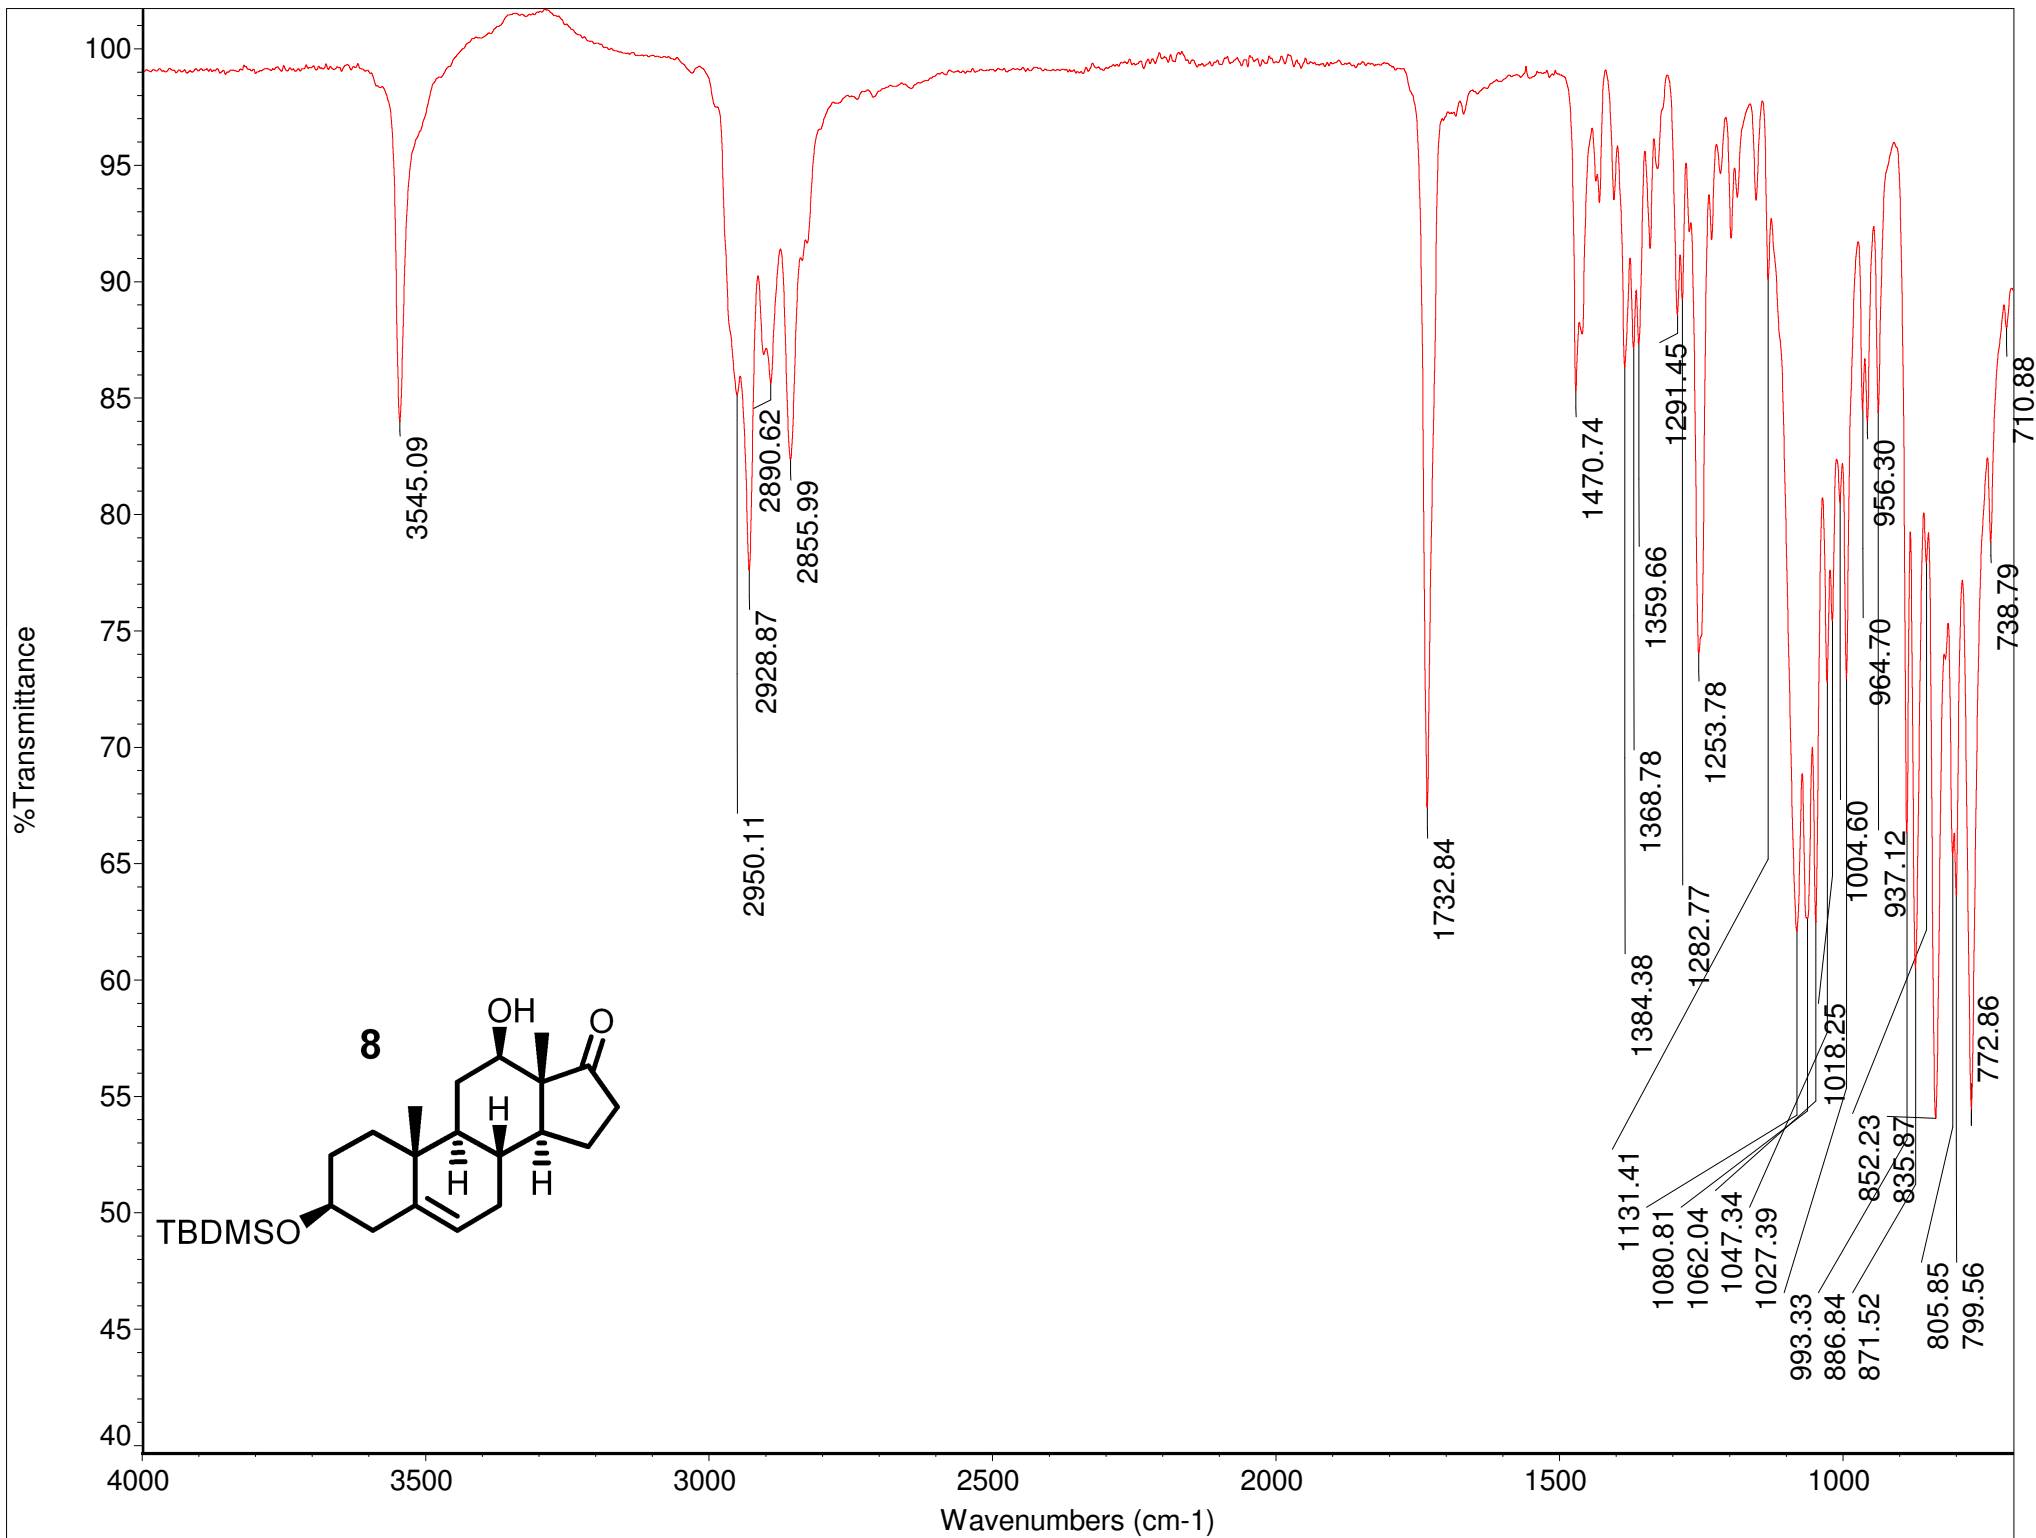

RT: 0.00 - 9.97

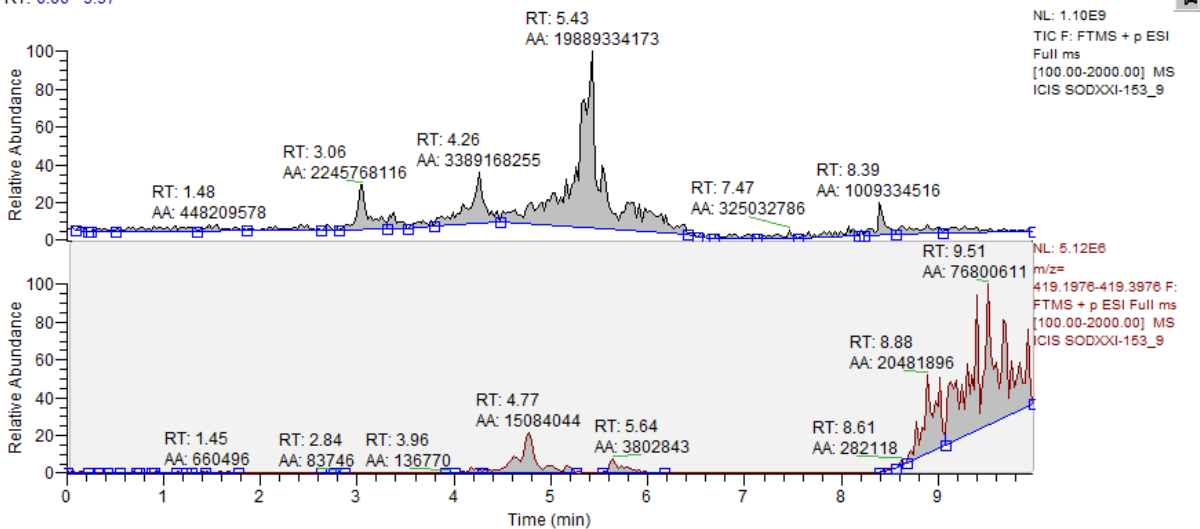

SODXXI-153\_9#163-192 RT: 4.39-5.18 AV: 30 NL: 3.23E5  
F: FTMS + p ESI Full ms [100.00-2000.00]

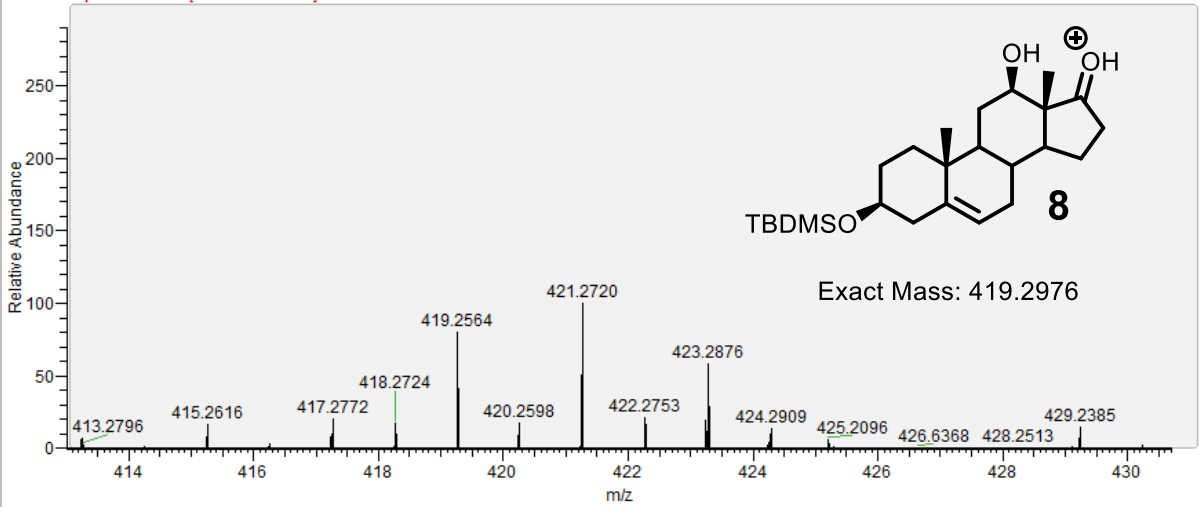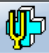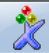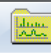

**LAXCO** Optical Rotation 2023-09-09  
08:51:36

Original O.R. : 0.038°      O.R. ° 

**0.038**

Temp. : 21.7°C ↓ 21.6°C

| WLC    | Cell      | ATC  |
|--------|-----------|------|
| D89.44 | 1.00000cm | 20.0 |

| Mode   | Times | GLP |
|--------|-------|-----|
| single | 1     | off |

database      save

  
  
  


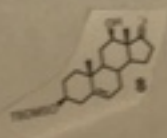

21.8mg  


---

 10ml

0-038



7.260  
 5.374  
 5.306  
 3.818  
 3.809  
 3.795  
 3.786  
 3.515  
 2.500  
 2.484  
 2.461  
 2.445  
 2.320  
 2.316  
 2.310  
 2.306  
 2.229  
 2.152  
 2.134  
 2.116  
 2.113  
 2.095  
 2.077  
 1.868  
 1.861  
 1.857  
 1.837  
 1.834  
 1.826  
 1.809  
 1.799  
 1.790  
 1.686  
 1.679  
 1.661  
 1.643  
 1.636  
 1.618  
 1.490  
 1.486  
 1.463  
 1.461  
 1.438  
 1.435  
 1.412  
 1.120  
 1.115  
 1.111  
 1.095  
 1.086  
 1.040  
 0.955

Operator: [unreadable]  
 Date: 20211002  
 Time: 18:59:11  
 INSTRUM spect  
 PROBHD 2149001\_0004  
 PULPROG zg30  
 TD 32768  
 SOLVENT CDCl3  
 NS 8  
 DS 0  
 SWH 10000.000 Hz  
 FIDRES 0.610352 Hz  
 AQ 1.6384000 sec  
 RG 69.17  
 DW 50.000 usec  
 DE 10.000 usec  
 TE 298.2 K  
 D1 1.00000000 sec  
 TDO 1  
 SFO1 500.1330883 MHz  
 NUC1 1H  
 PO 4.27 usec  
 P1 12.81 usec  
 PLW1 19.99900055 W  
 F2 - Processing parameters  
 SI 65536  
 SF 500.1300120 MHz  
 WDW EM  
 SSB 0  
 LB 0.30 Hz  
 GB 0  
 PC 1.00

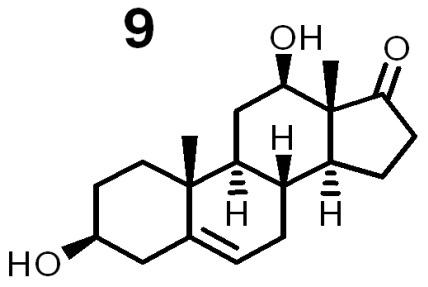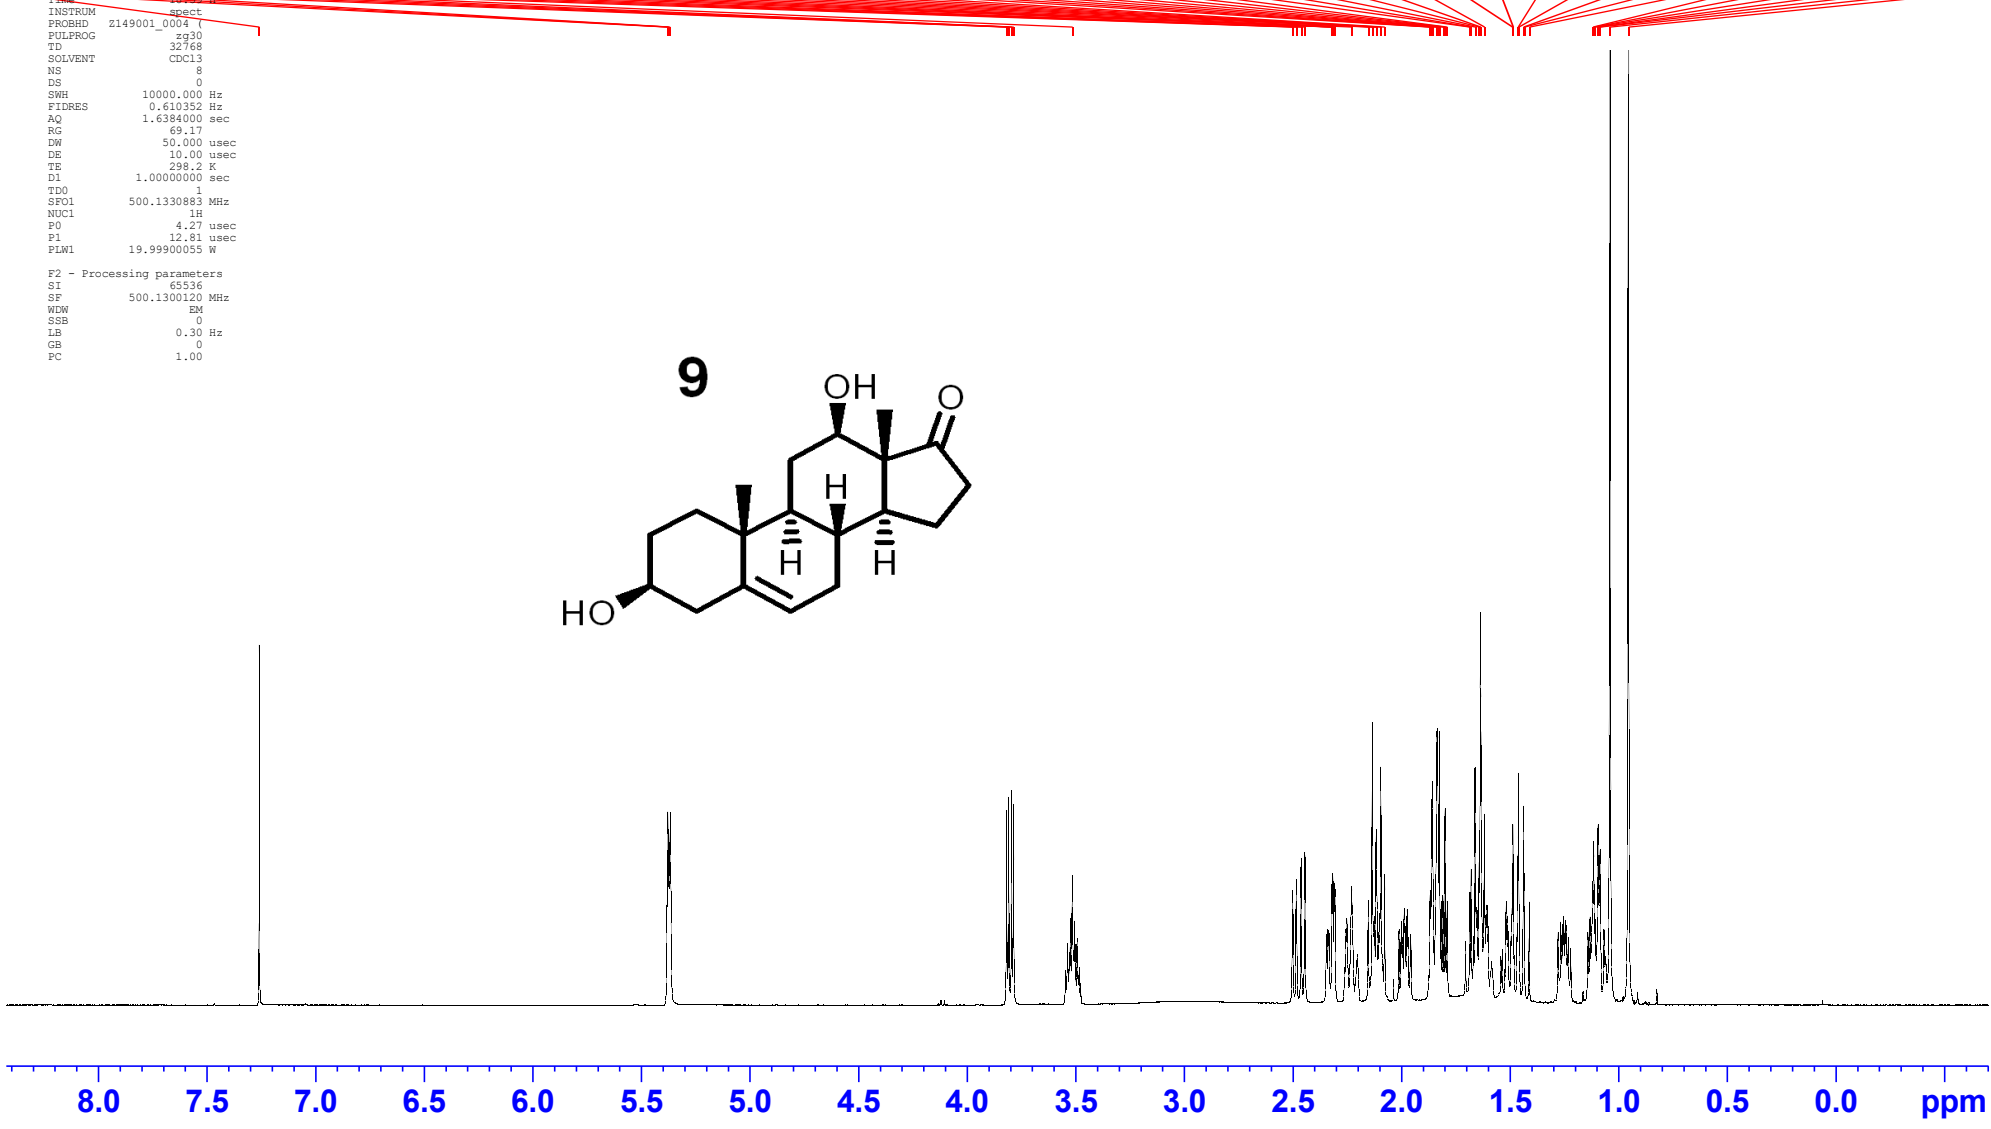

1.00  
 1.01  
 1.04  
 1.16  
 1.10  
 1.04  
 2.13  
 1.22  
 3.42  
 3.50  
 2.32  
 1.10  
 1.91  
 3.27  
 3.04

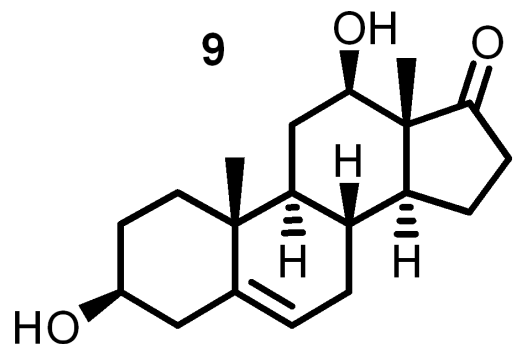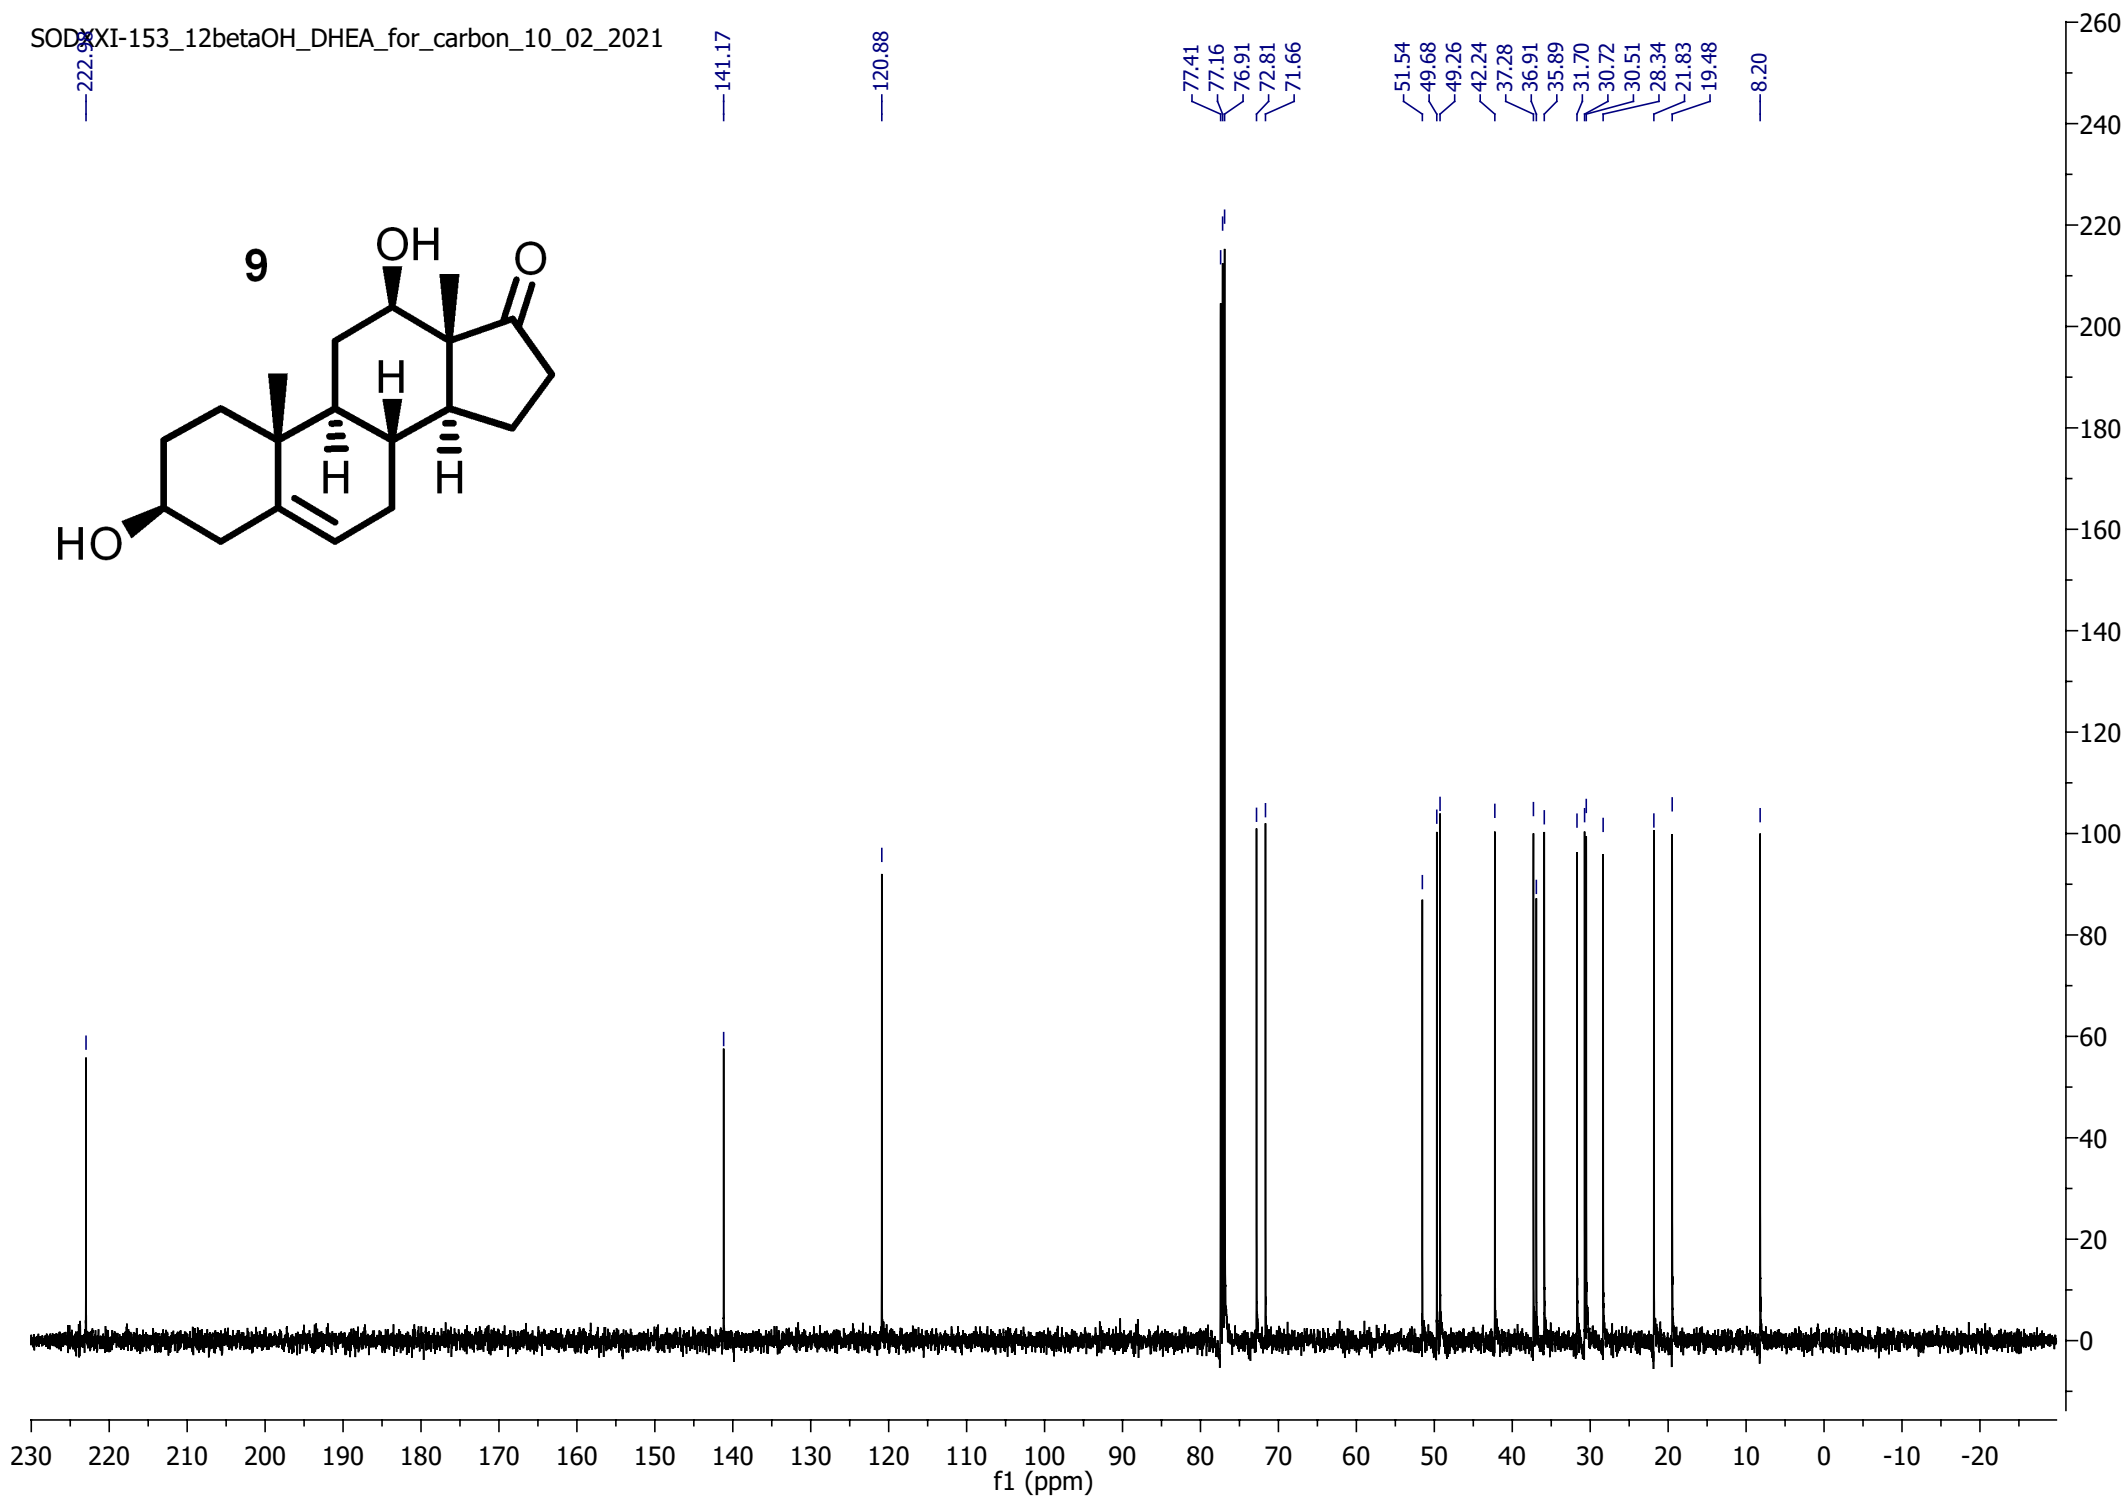

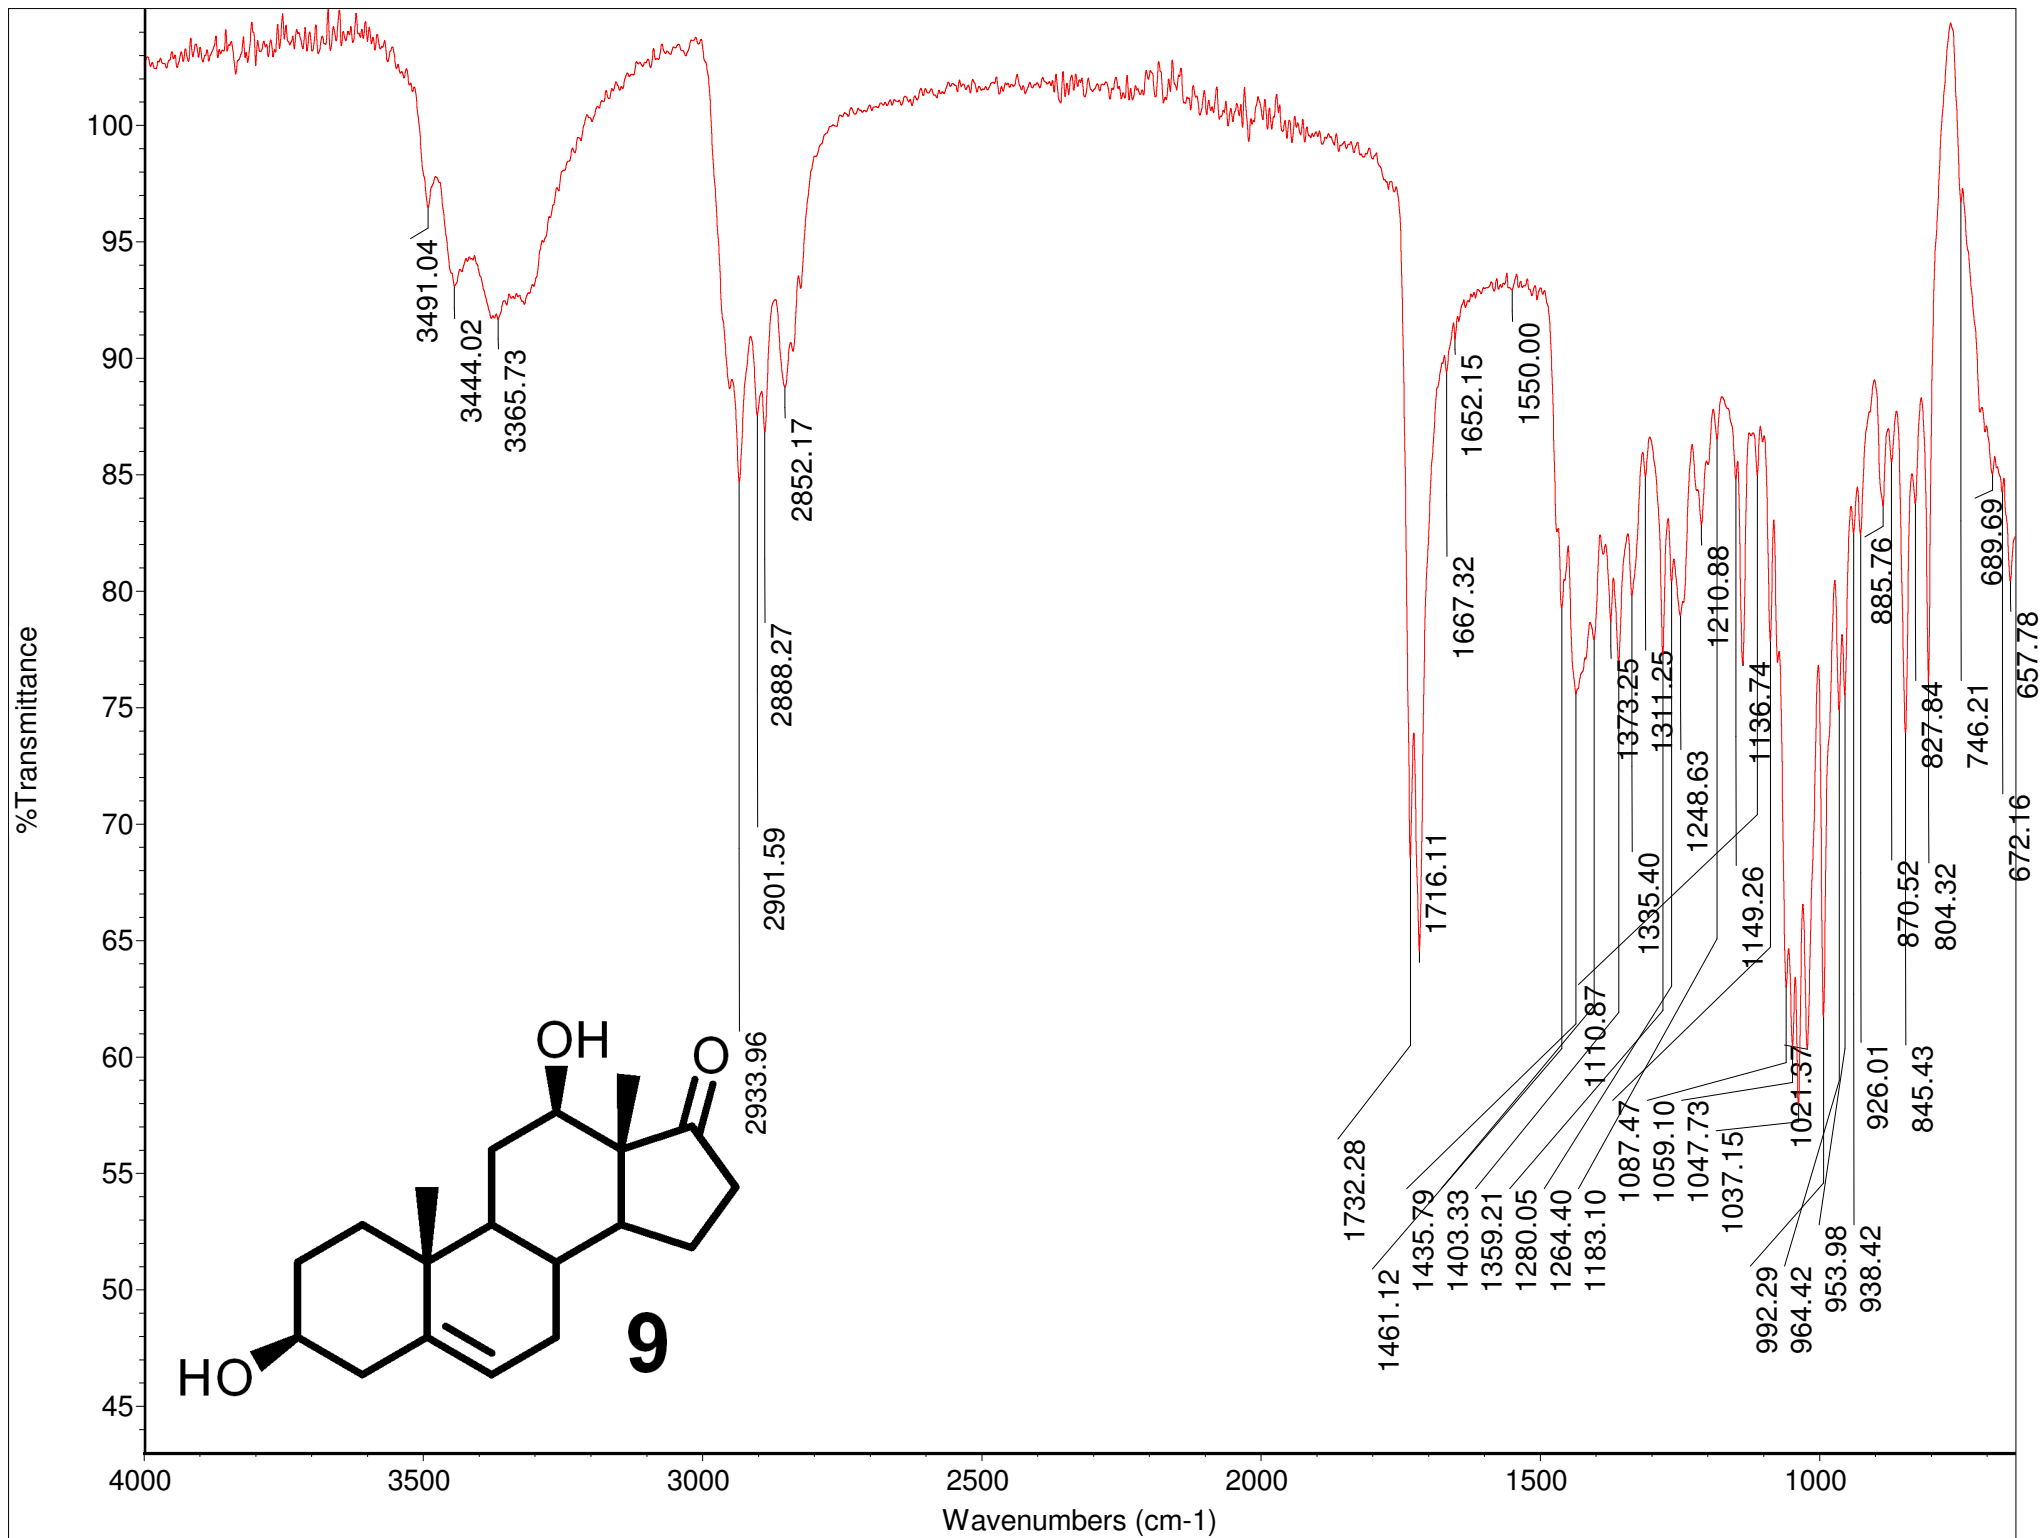

RT: 0.00 - 9.98

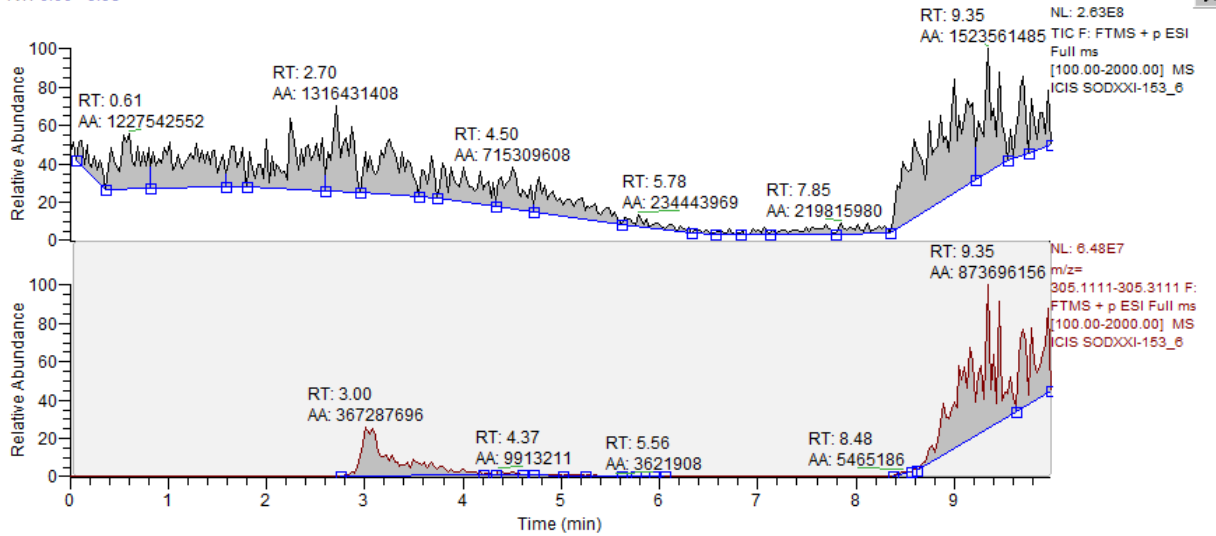

SODXXI-153\_6 #102-130 RT: 2.73-3.49 AV: 29 NL: 6.27E6  
F: FTMS + p ESI Full ms [100.00-2000.00]

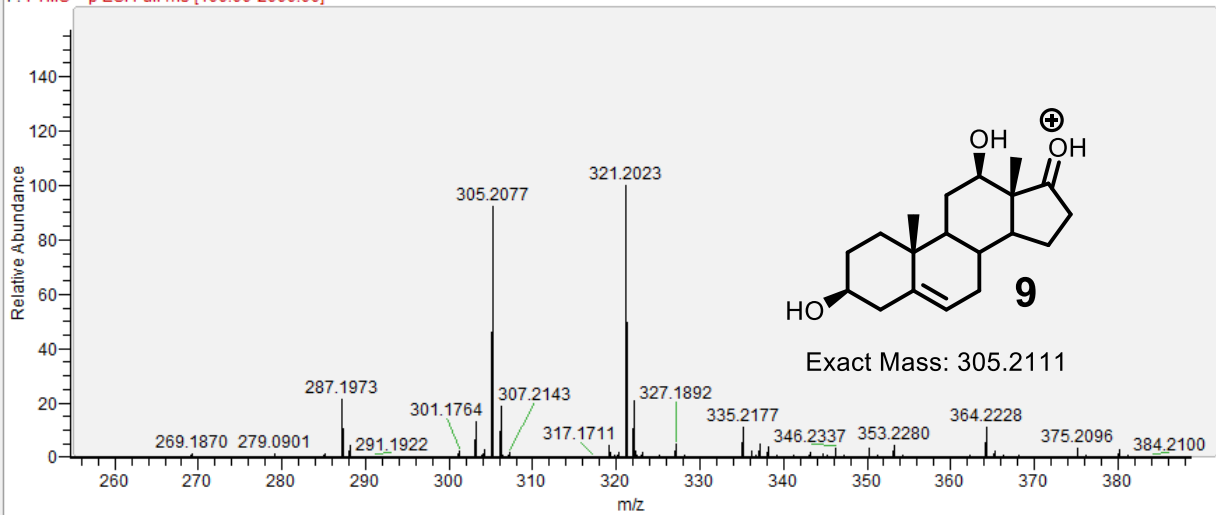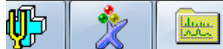

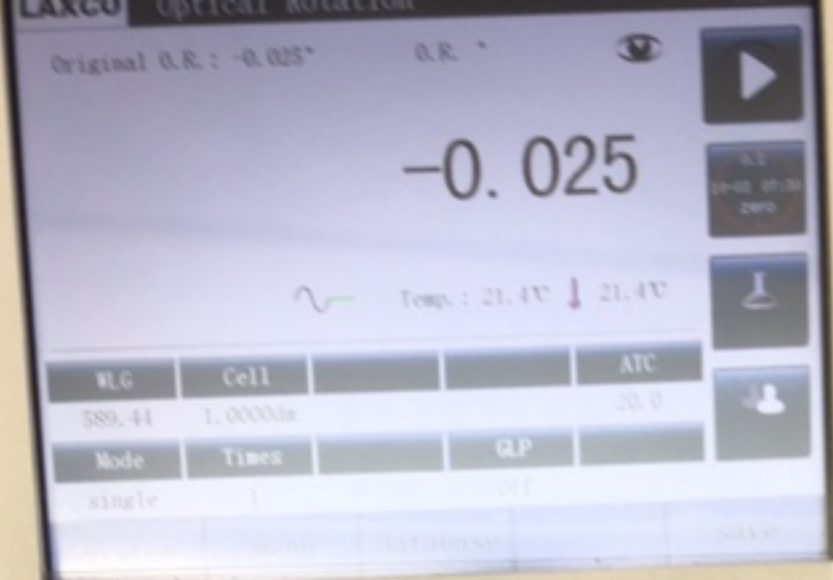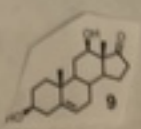

$$\frac{12.8 \text{ mg}}{10 \text{ mL}} = 1.28 \text{ mg/mL}$$

CaCl<sub>2</sub> -0.025

5.351  
 4.446  
 3.540  
 3.020  
 2.010  
 1.999  
 1.994  
 1.991  
 1.987  
 1.983  
 1.979  
 1.976  
 1.971  
 1.960  
 1.957  
 1.898  
 1.889  
 1.885  
 1.882  
 1.873  
 1.859  
 1.829  
 1.824  
 1.921  
 1.864  
 1.858  
 1.846  
 1.838  
 1.836  
 1.828  
 1.816  
 1.800  
 1.792  
 1.766  
 1.712  
 1.704  
 1.701  
 1.694  
 1.533  
 1.520  
 1.515  
 1.511  
 1.505  
 1.487  
 1.483  
 1.465  
 1.457  
 1.432  
 1.408  
 1.390  
 1.383  
 1.375  
 1.361  
 1.028  
 0.931

F2 - Acquisition Parameters  
 Date\_ 20210221  
 Time\_ 5.08 h  
 INSTRUM spect  
 PROBHD z143298\_0003 (  
 PULPROG zg30  
 TD 32768  
 SOLVENT CDCl3  
 NS 8  
 DS 0  
 SWH 10000.000 Hz  
 FIDRES 0.610352 Hz  
 AQ 1.6384000 sec  
 RG 103.84  
 DW 50.000 usec  
 DE 6.50 usec  
 TE 298.1 K  
 D1 1.00000000 sec  
 TD0 1  
 SFO1 500.1330883 MHz  
 NUC1 1H  
 PO 3.83 usec  
 P1 11.50 usec  
 PLW1 9.90830040 W

F2 - Processing parameters  
 SI 65536  
 SF 500.1300000 MHz  
 MDW EM  
 SSB 0  
 LB 0.30 Hz  
 GB 0  
 PC 1.00

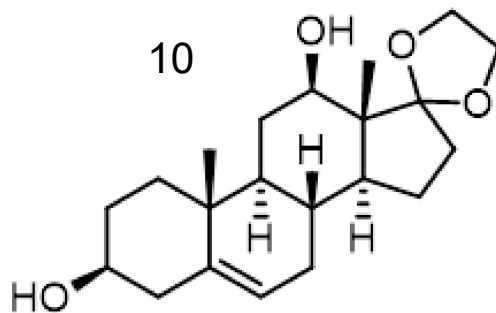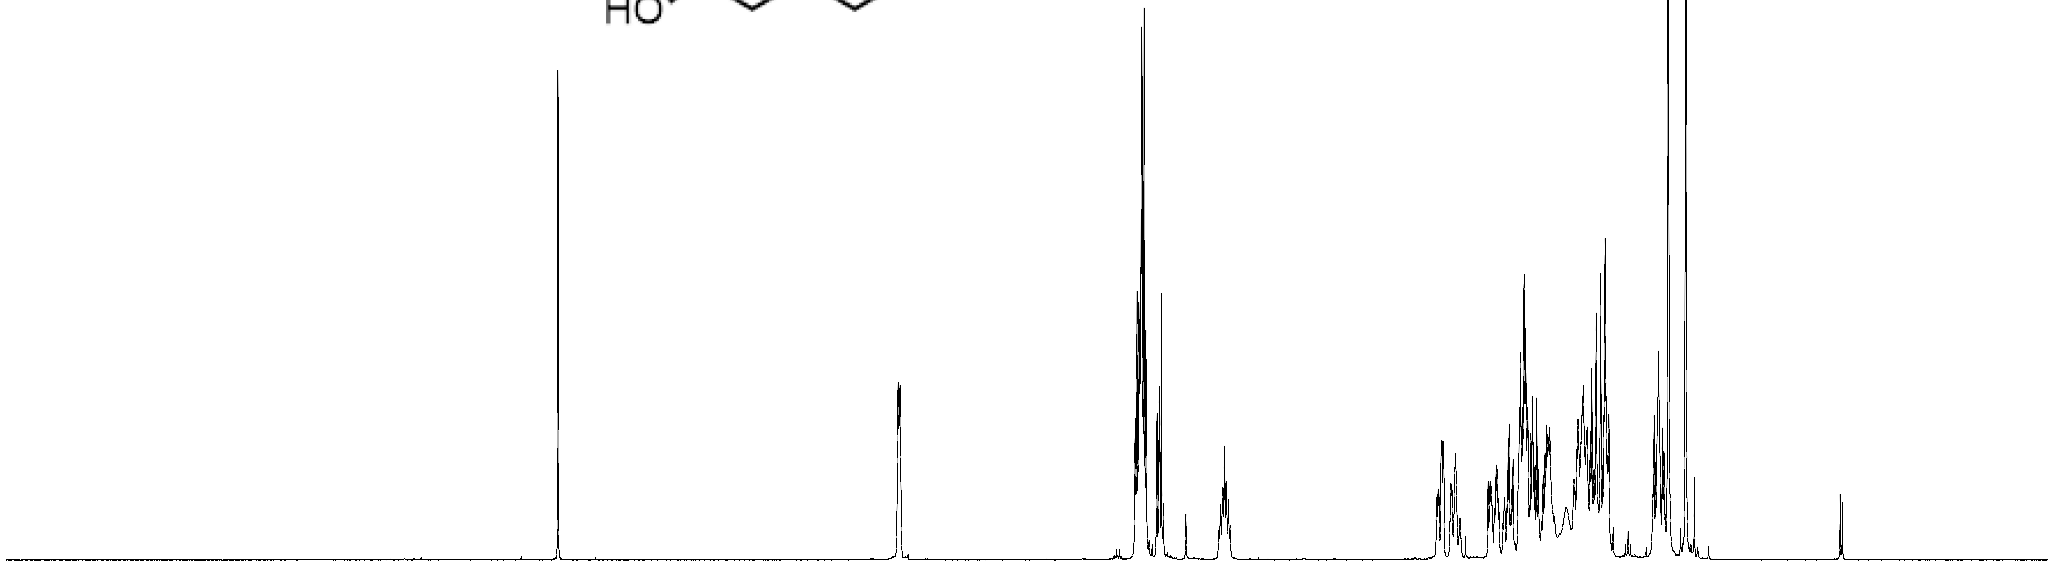

10 9 8 7 6 5 4 3 2 1 0 ppm

1.00  
 4.09  
 1.08  
 1.00  
 1.04  
 1.07  
 1.13  
 1.10  
 4.37  
 1.92  
 7.16  
 2.11  
 3.14  
 3.02

Current Data Parameters  
NAME SODXIX\_065B\_DIOL\_KETAL\_FU\_02\_20\_2021  
EXPNO 2  
PROCNO 1

F2 - Acquisition Parameters

Date\_ 20210221  
Time 9.51 h  
INSTRUM spect  
PROBHD Z143298\_0003 (  
PULPROG udefn  
TD 21424  
SOLVENT CDCl3  
NS 512  
DS 0  
SWH 29761.904 Hz  
FIDRES 2.778370 Hz  
AQ 0.3599232 sec  
RG 185.92  
DW 16.800 usec  
DE 8.31 usec  
TE 298.1 K  
D1 4.00000000 sec  
D12 0.00002000 sec  
D20 20.00000000 sec  
TDO 1  
SFO1 125.7703643 MHz  
NUC1 13C  
P1 18.25 usec  
P13 2000.00 usec  
P26 500.00 usec  
PLW1 115.08000183 W  
SPNAM[5] Crp60comp.4  
SPOAL5 0.500  
SPOFFS5 0 Hz  
SPW5 58.56200027 W  
SPNAM[8] Crp60,0.5,20.1  
SPOAL8 0.500  
SPOFFS8 0 Hz  
SPW8 58.56200027 W  
SFO2 500.1320005 MHz  
NUC2 1H  
CPDPRG[2] waltz16  
PCPD2 80.00 usec  
PLW2 9.90830040 W  
PLW12 0.20475000 W

F2 - Processing parameters  
SI 131072  
SF 125.7577725 MHz  
WDW EM  
SSB 0  
LB 2.00 Hz  
GB 0  
PC 1.40

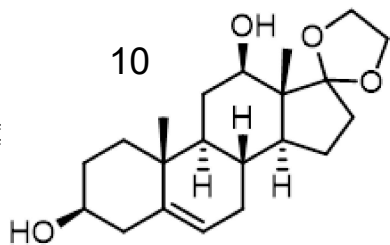

140.86

121.42

119.21

77.41

77.15

76.90

71.76

71.46

64.72

64.22

49.37

49.18

48.86

42.30

37.36

36.75

33.91

31.74

31.36

30.93

29.53

22.46

19.52

9.01

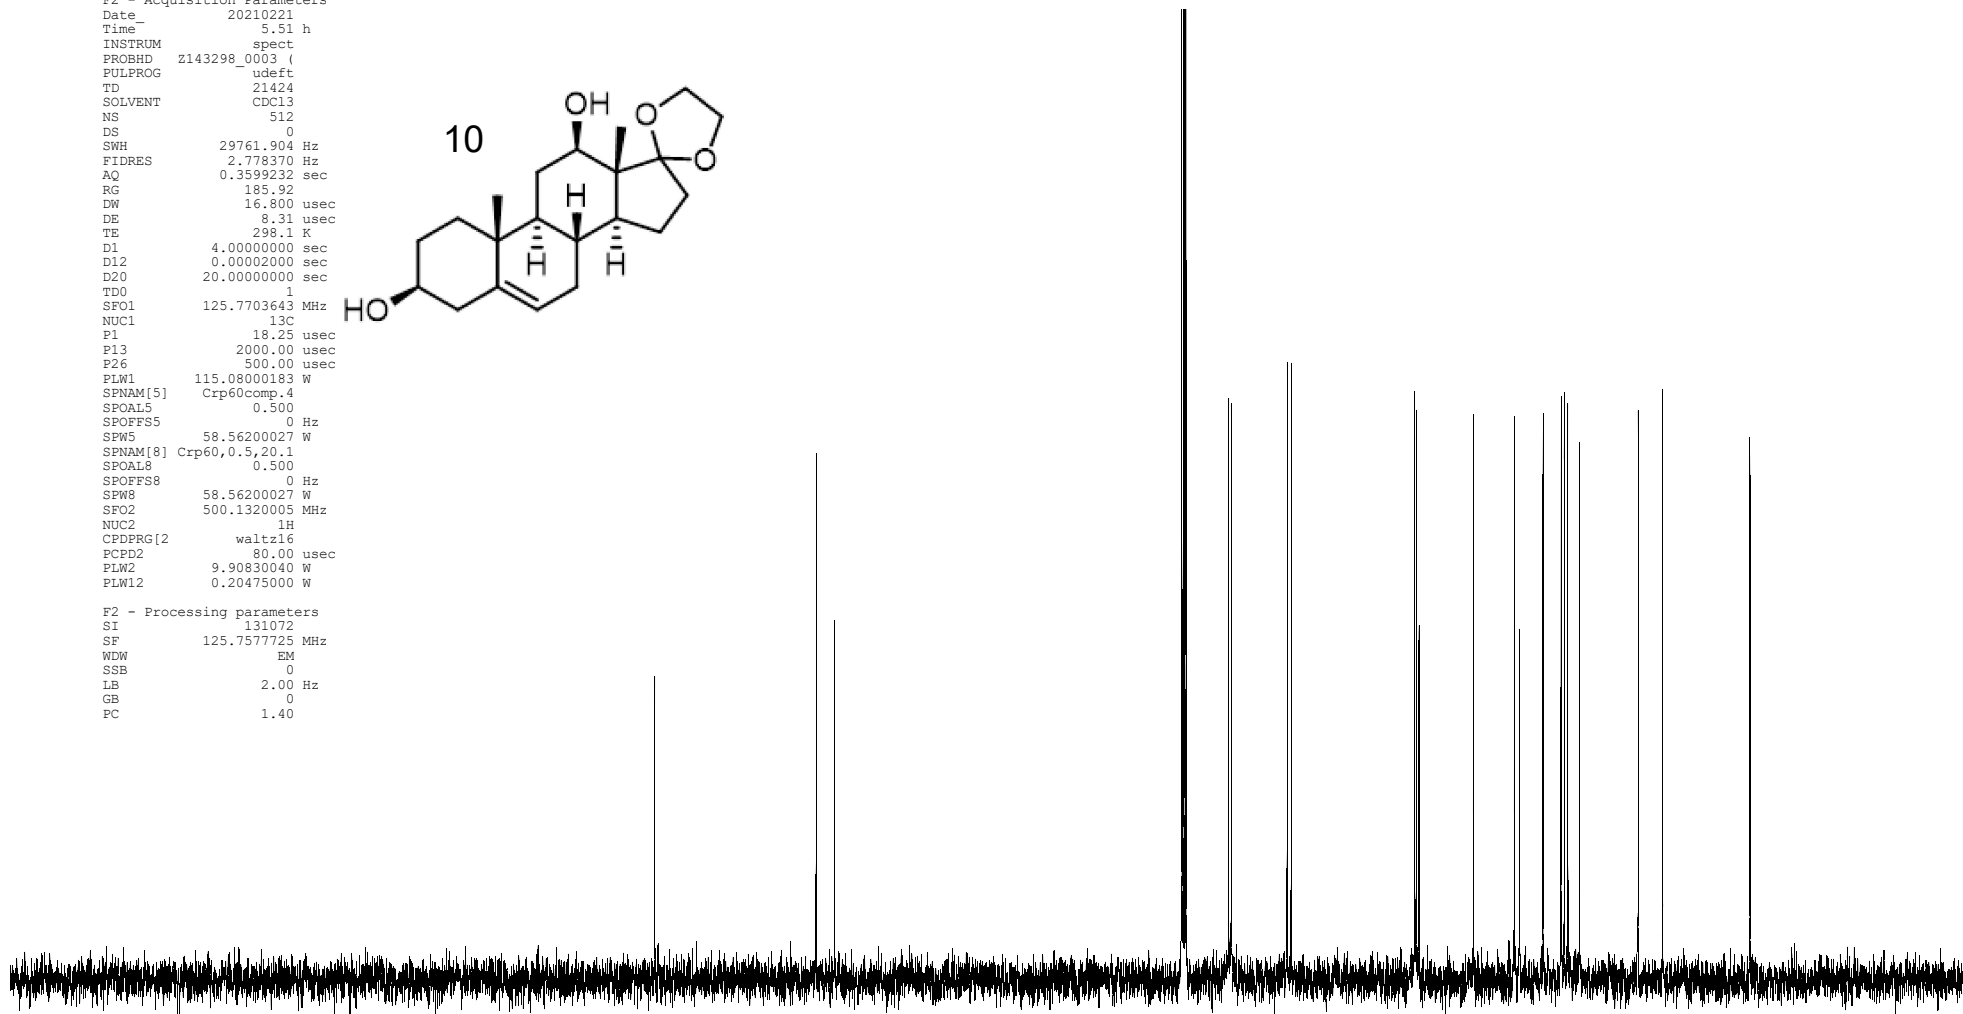

210 200 190 180 170 160 150 140 130 120 110 100 90 80 70 60 50 40 30 20 10 0 ppm

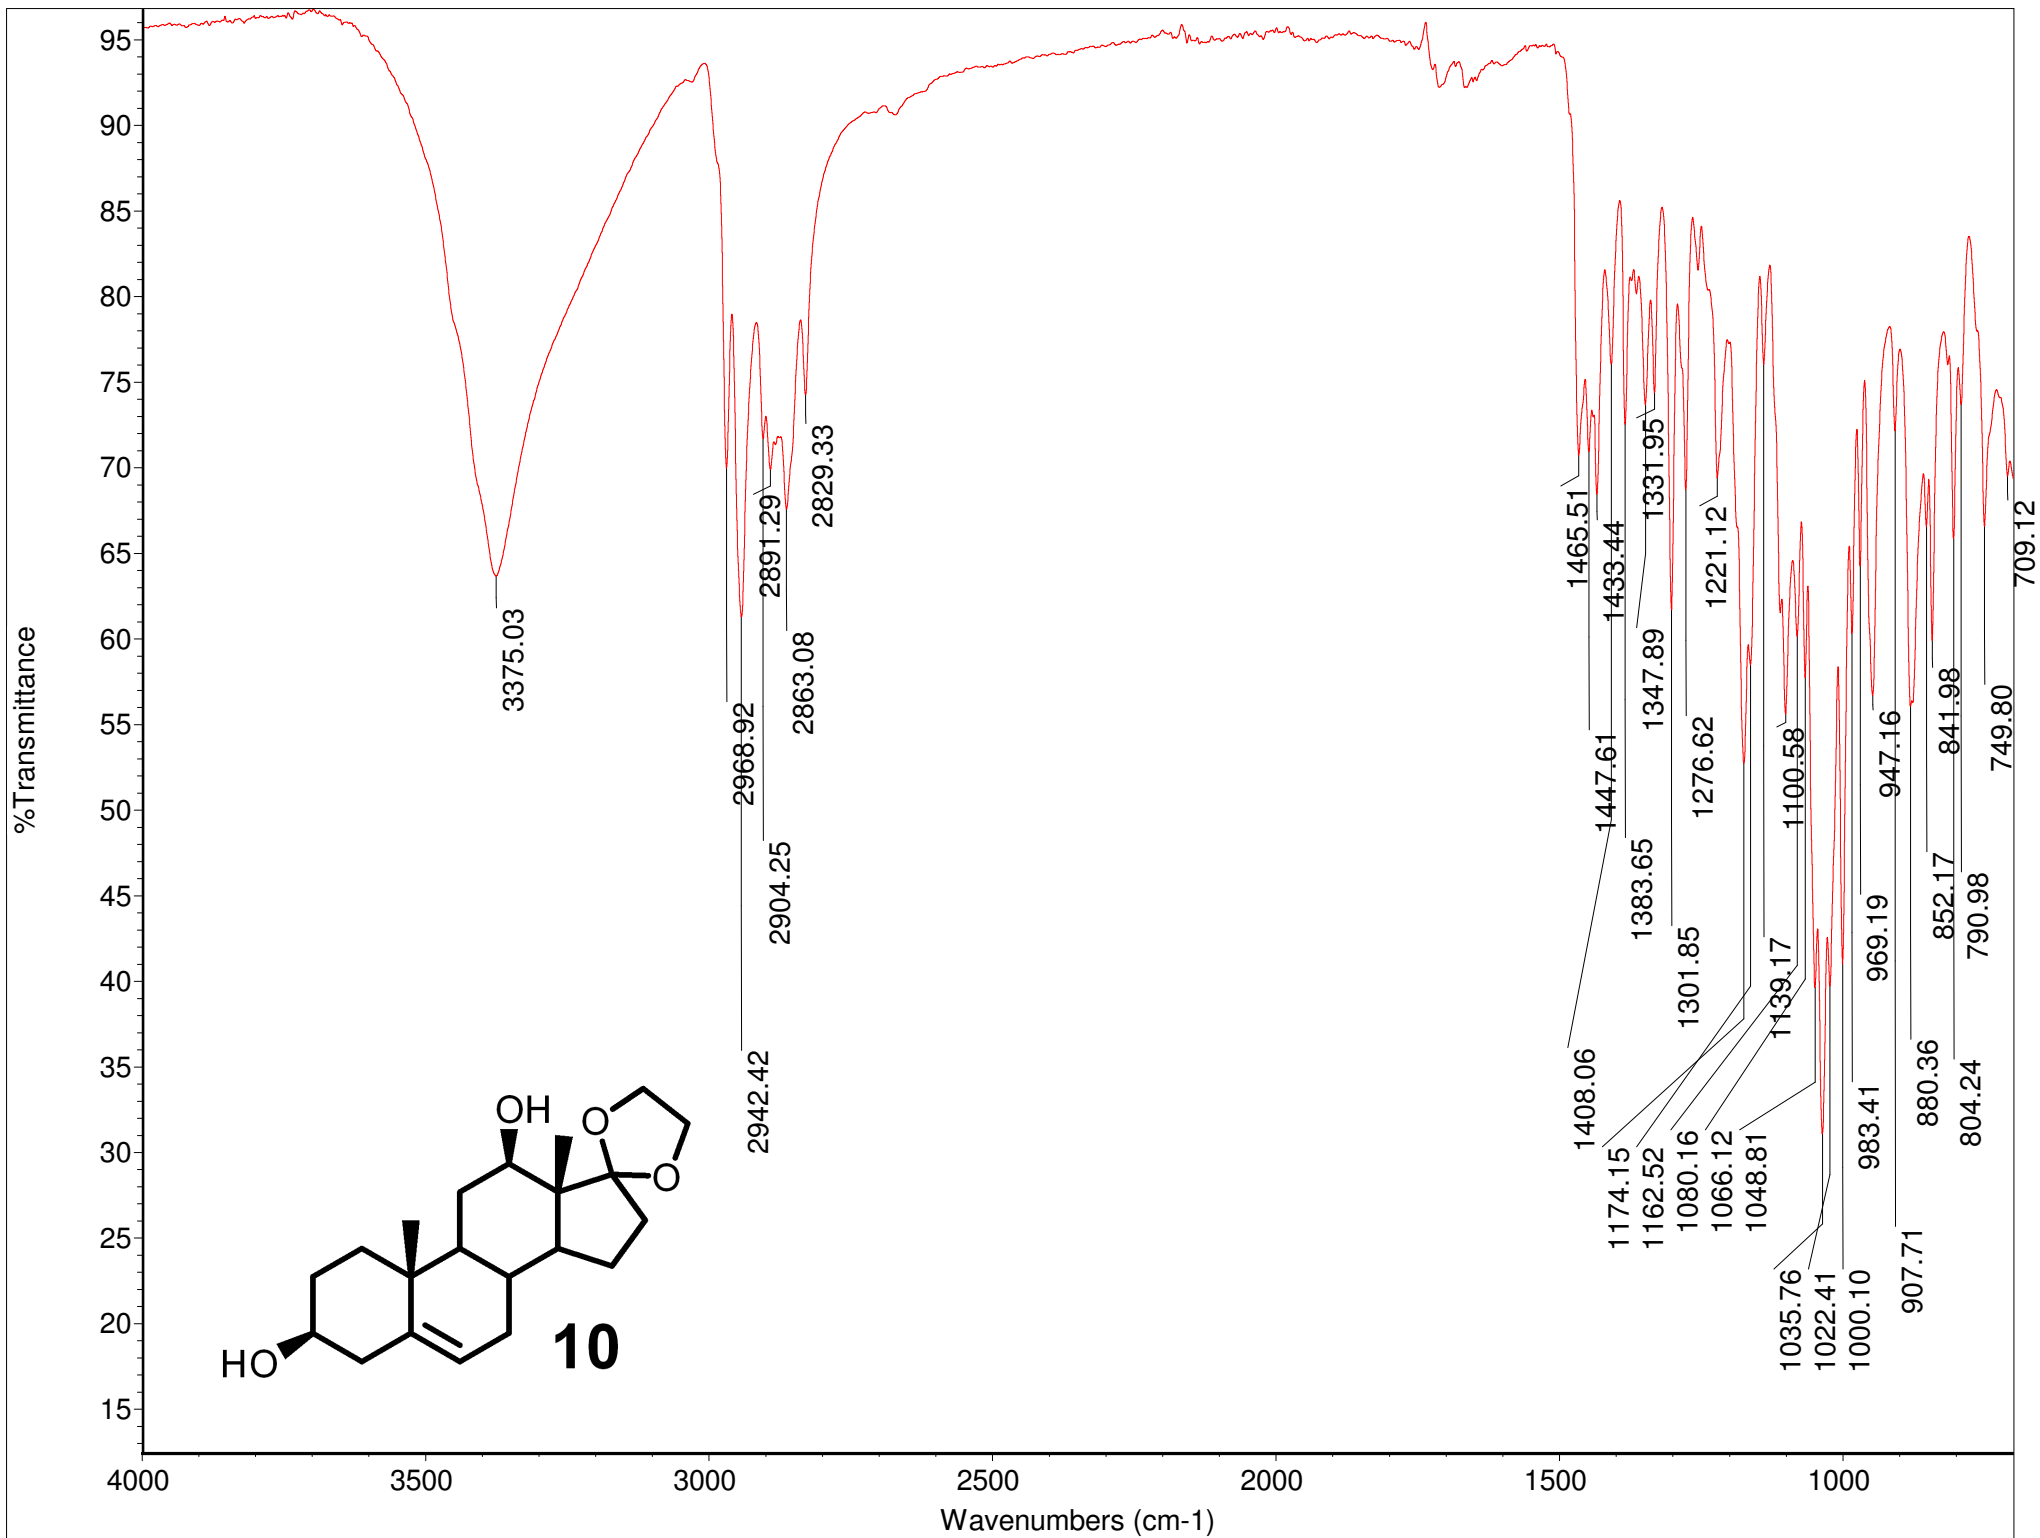



RT: 0.00 - 9.97

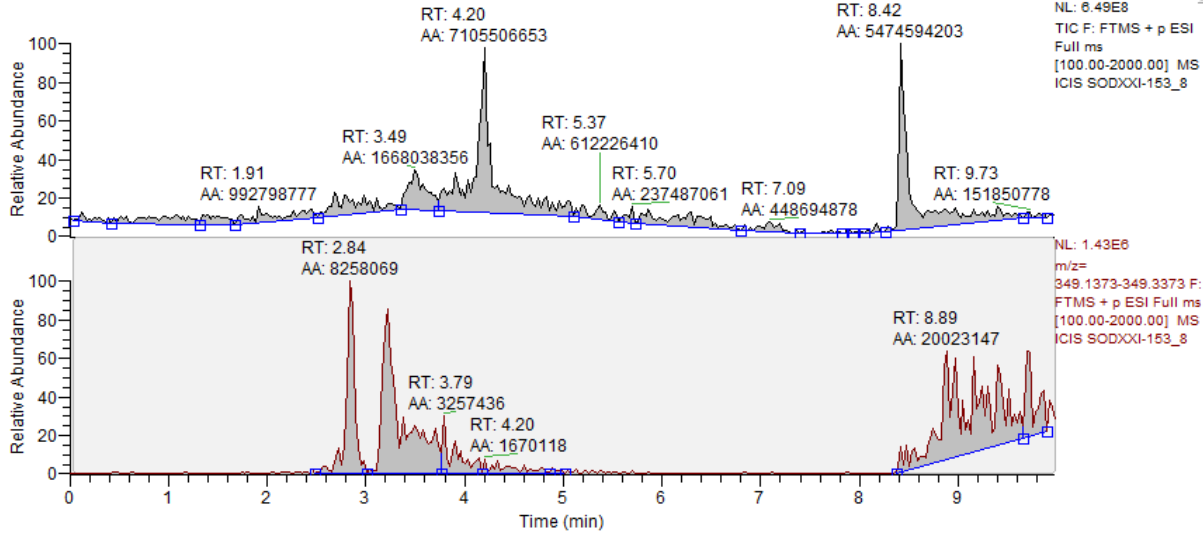

SODXXI-153\_8 #98-138 RT: 2.62-3.71 AV: 41 NL: 7.06E5  
F: FTMS + p ESI Full ms [100.00-2000.00]

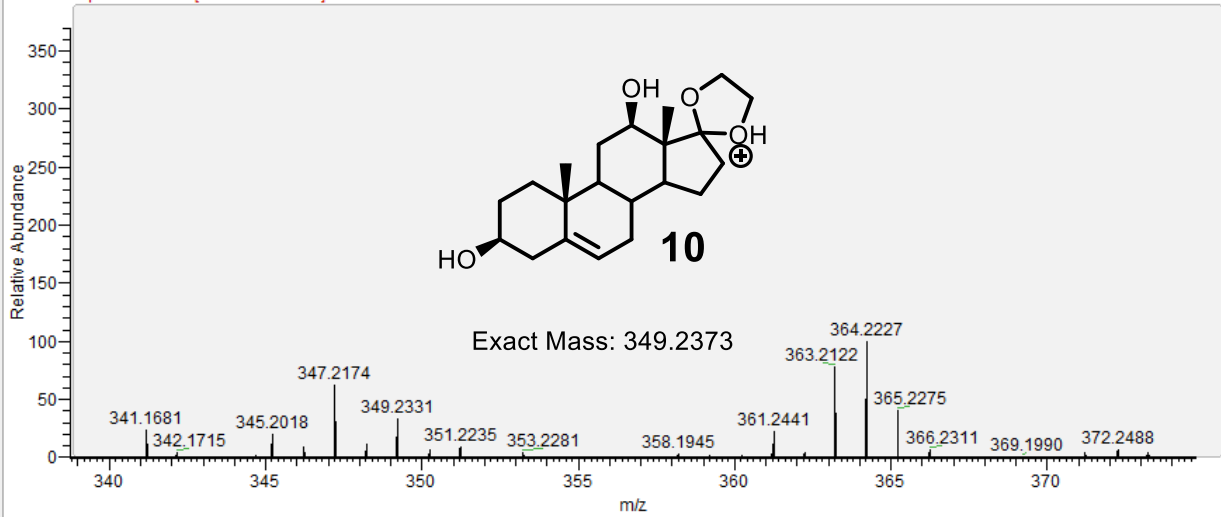

NUM

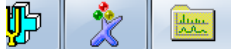

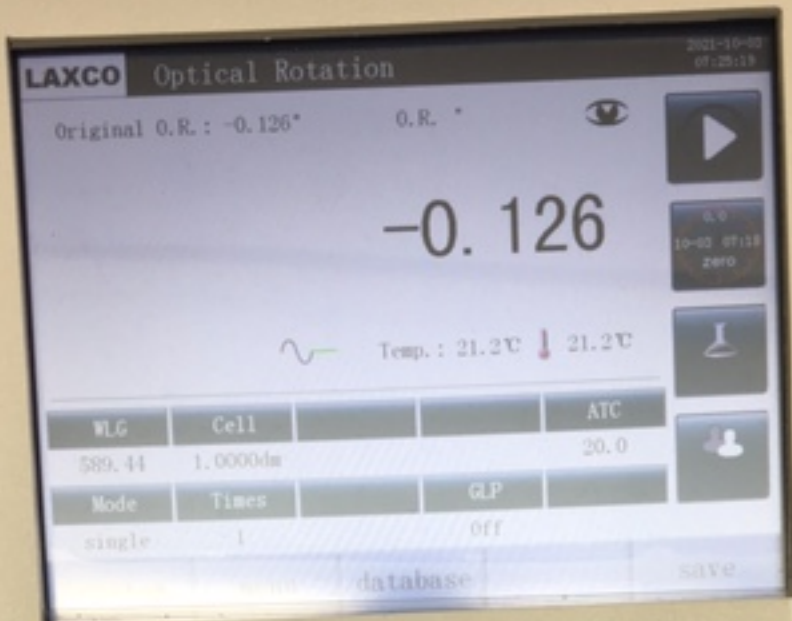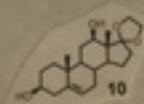

Diol-ketol

103 mg

10 ml of  $CCl_4$

$\Rightarrow -0.126$

Current Data Parameters  
NAME SODXXI\_153\_C12B\_OH\_KETAL\_C3\_OTBS\_[1H,13C]\_10\_04\_2021

EXPNO 1  
PROCNO 1  
Date\_ 20240404  
Time 13.51 h  
INSTRUM spect  
PROBHD z149001\_0004  
PULPROG zg30  
TD 32768  
SOLVENT CDCl3  
NS 8  
DS 0  
SWH 10000.000 Hz  
FIDRES 0.610352 Hz  
AQ 1.6384000 sec  
RG 28.76  
DW 50.000 usec  
DE 10.00 usec  
TE 298.1 K  
D1 1.00000000 sec  
TD0 1  
SF01 500.1330883 MHz  
NUC1 1H  
PO 4.27 usec  
P1 12.81 usec  
PLW1 19.99900055 W

F2 - Processing parameters  
SI 65536  
SF 500.1300121 MHz  
WDW EM  
SSB 0  
LB 0.30 Hz  
GB 0  
PC 1.00

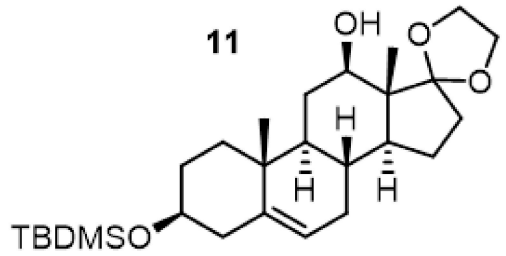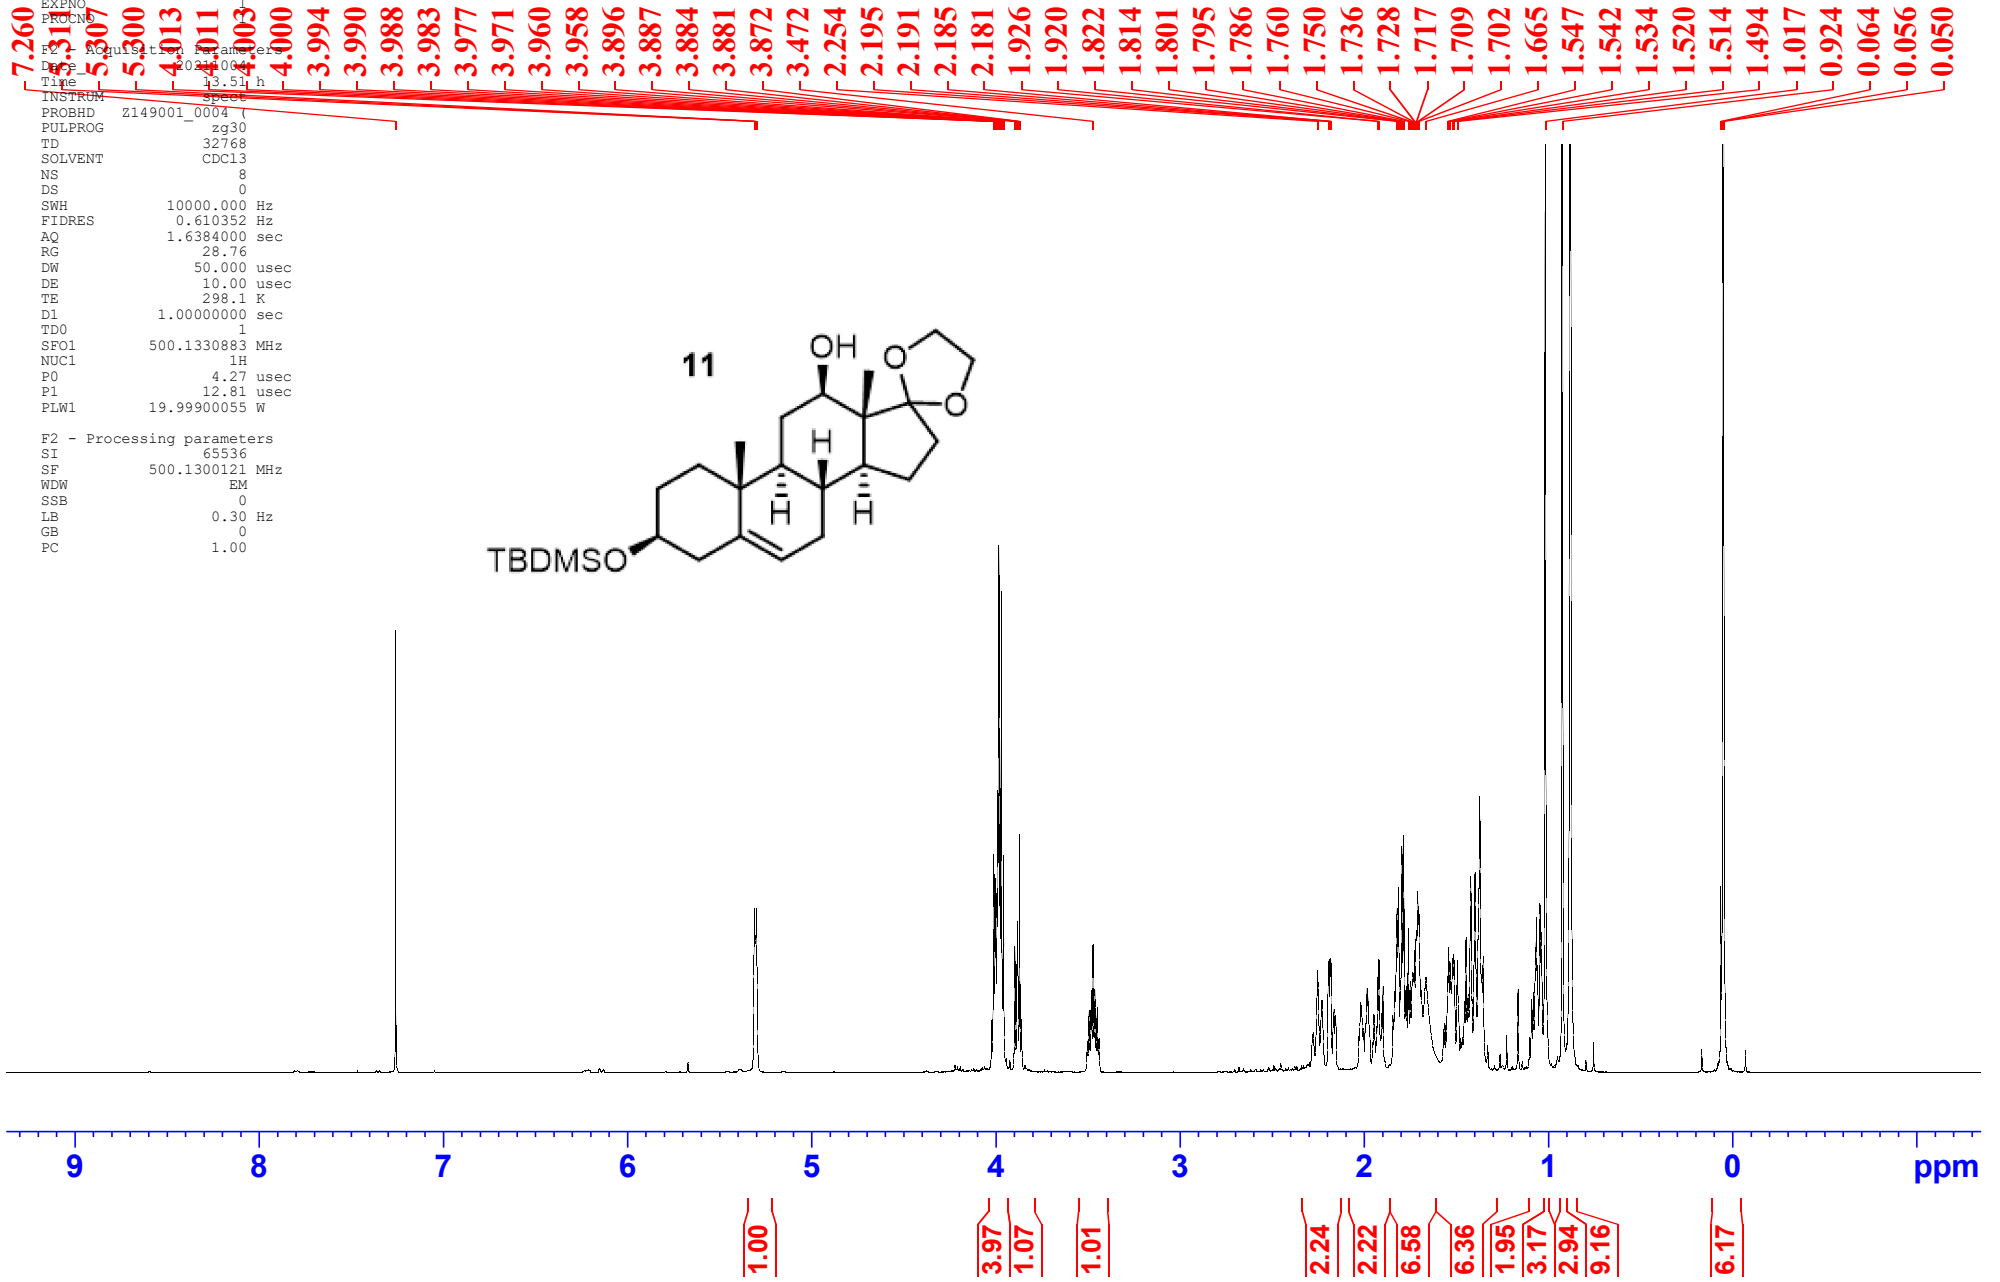

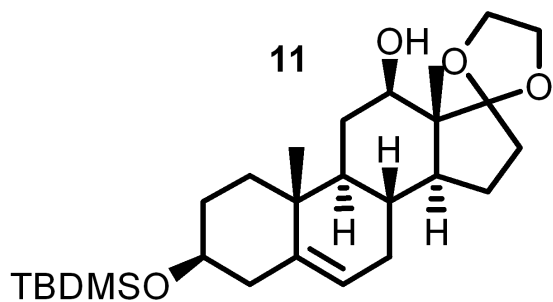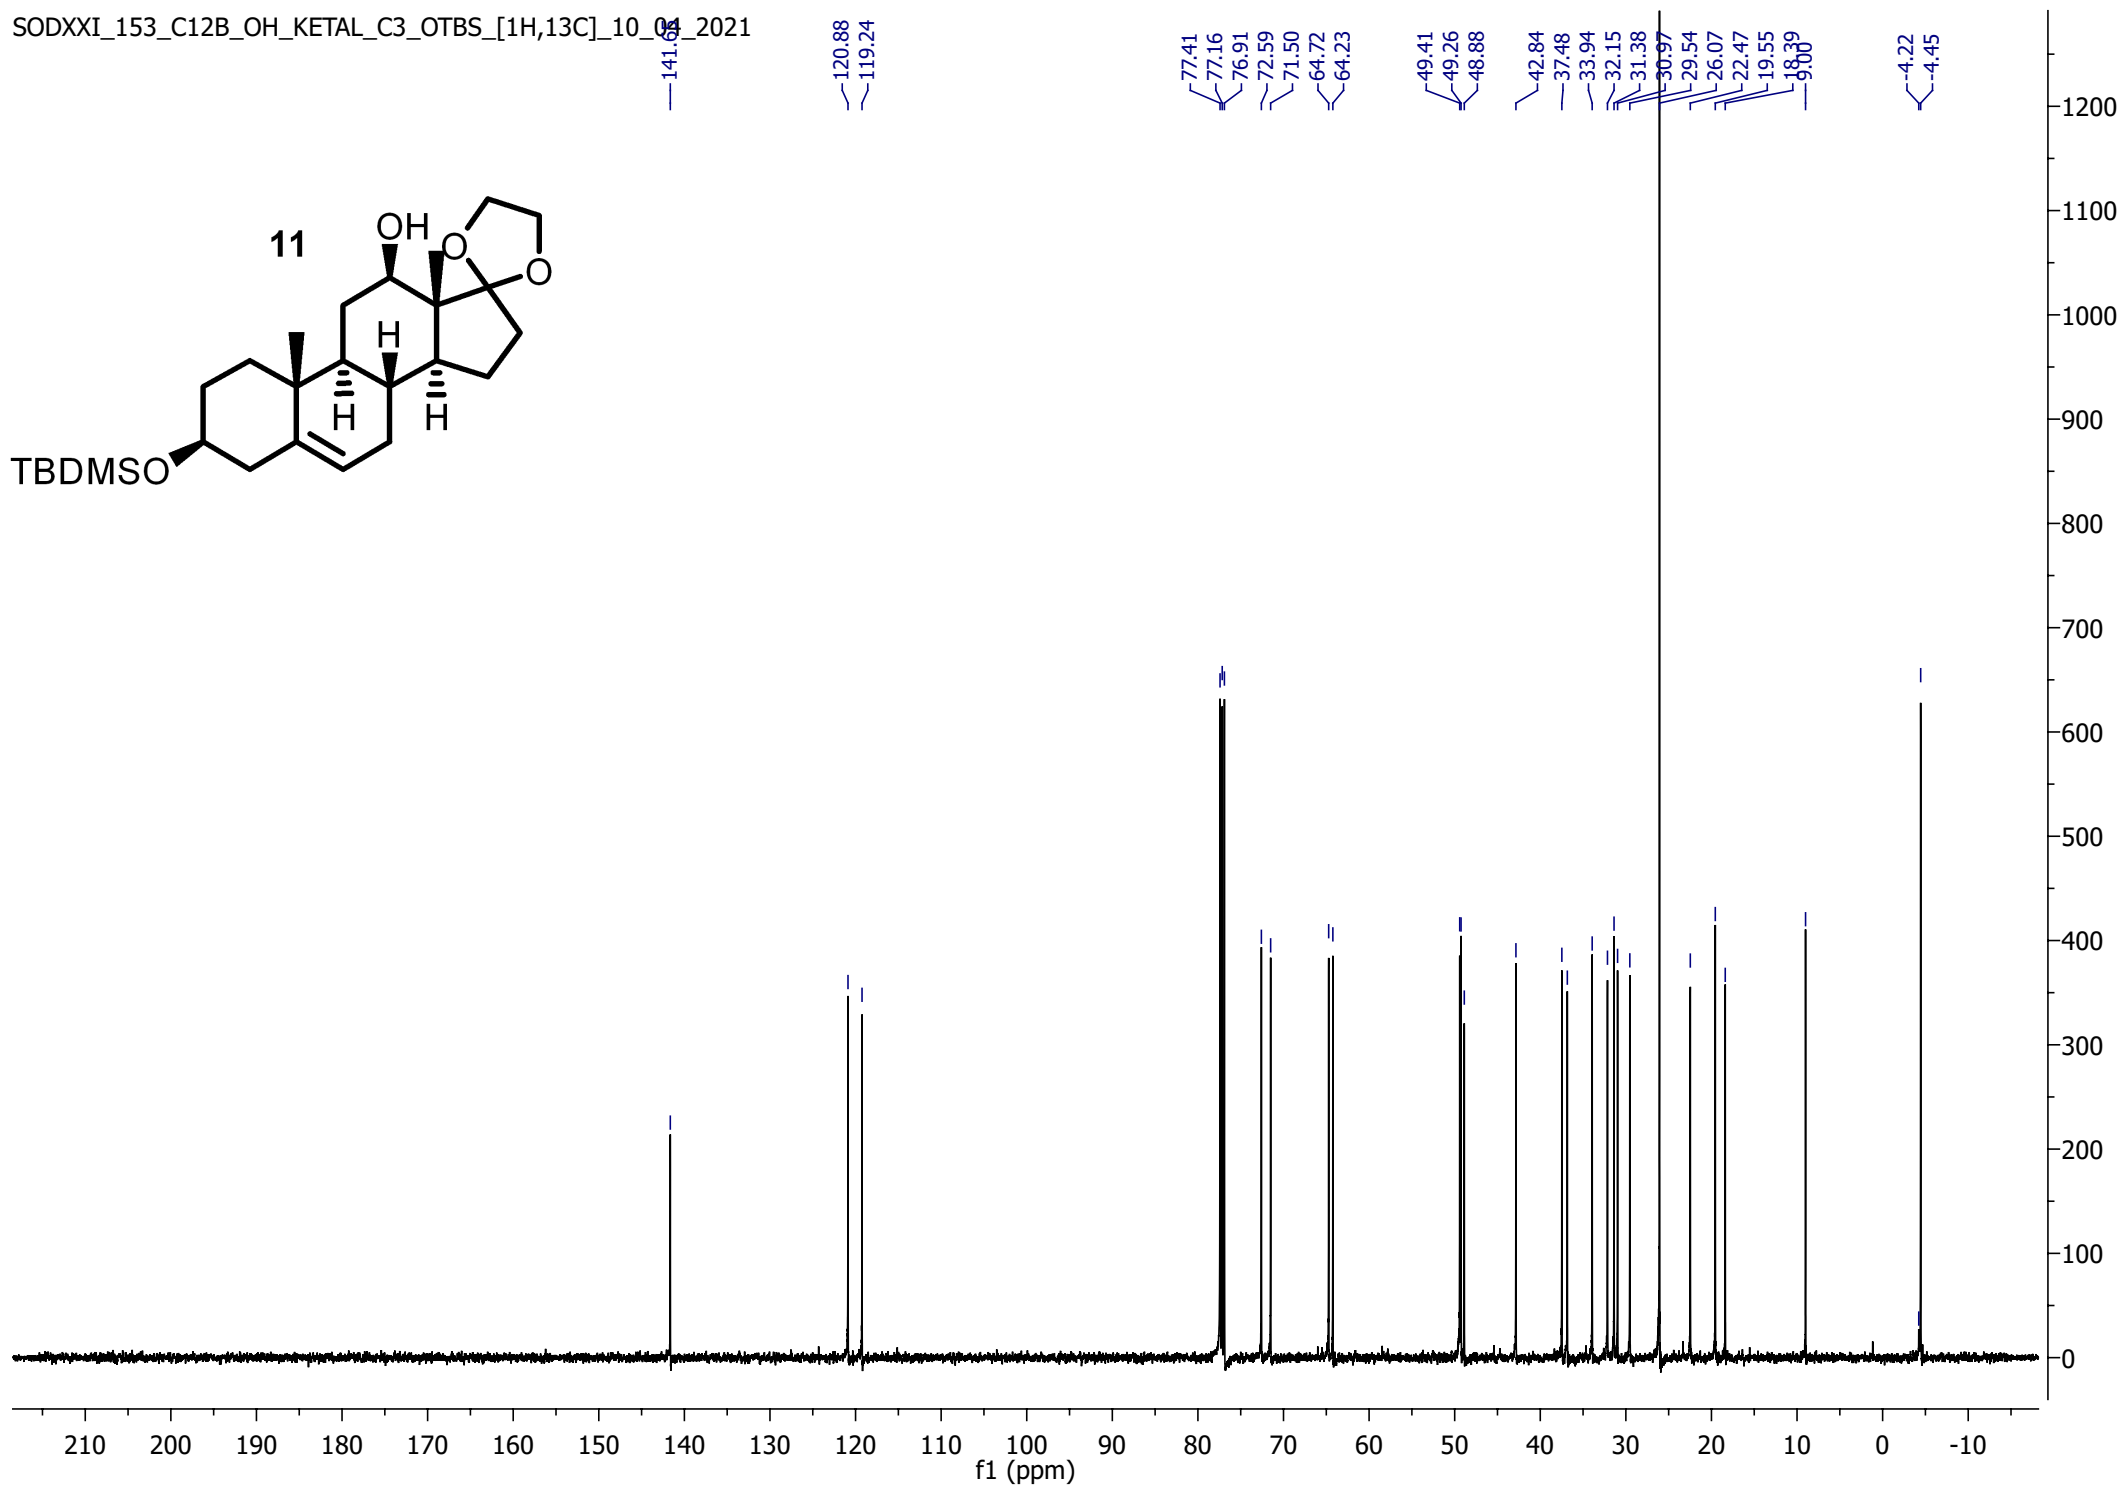

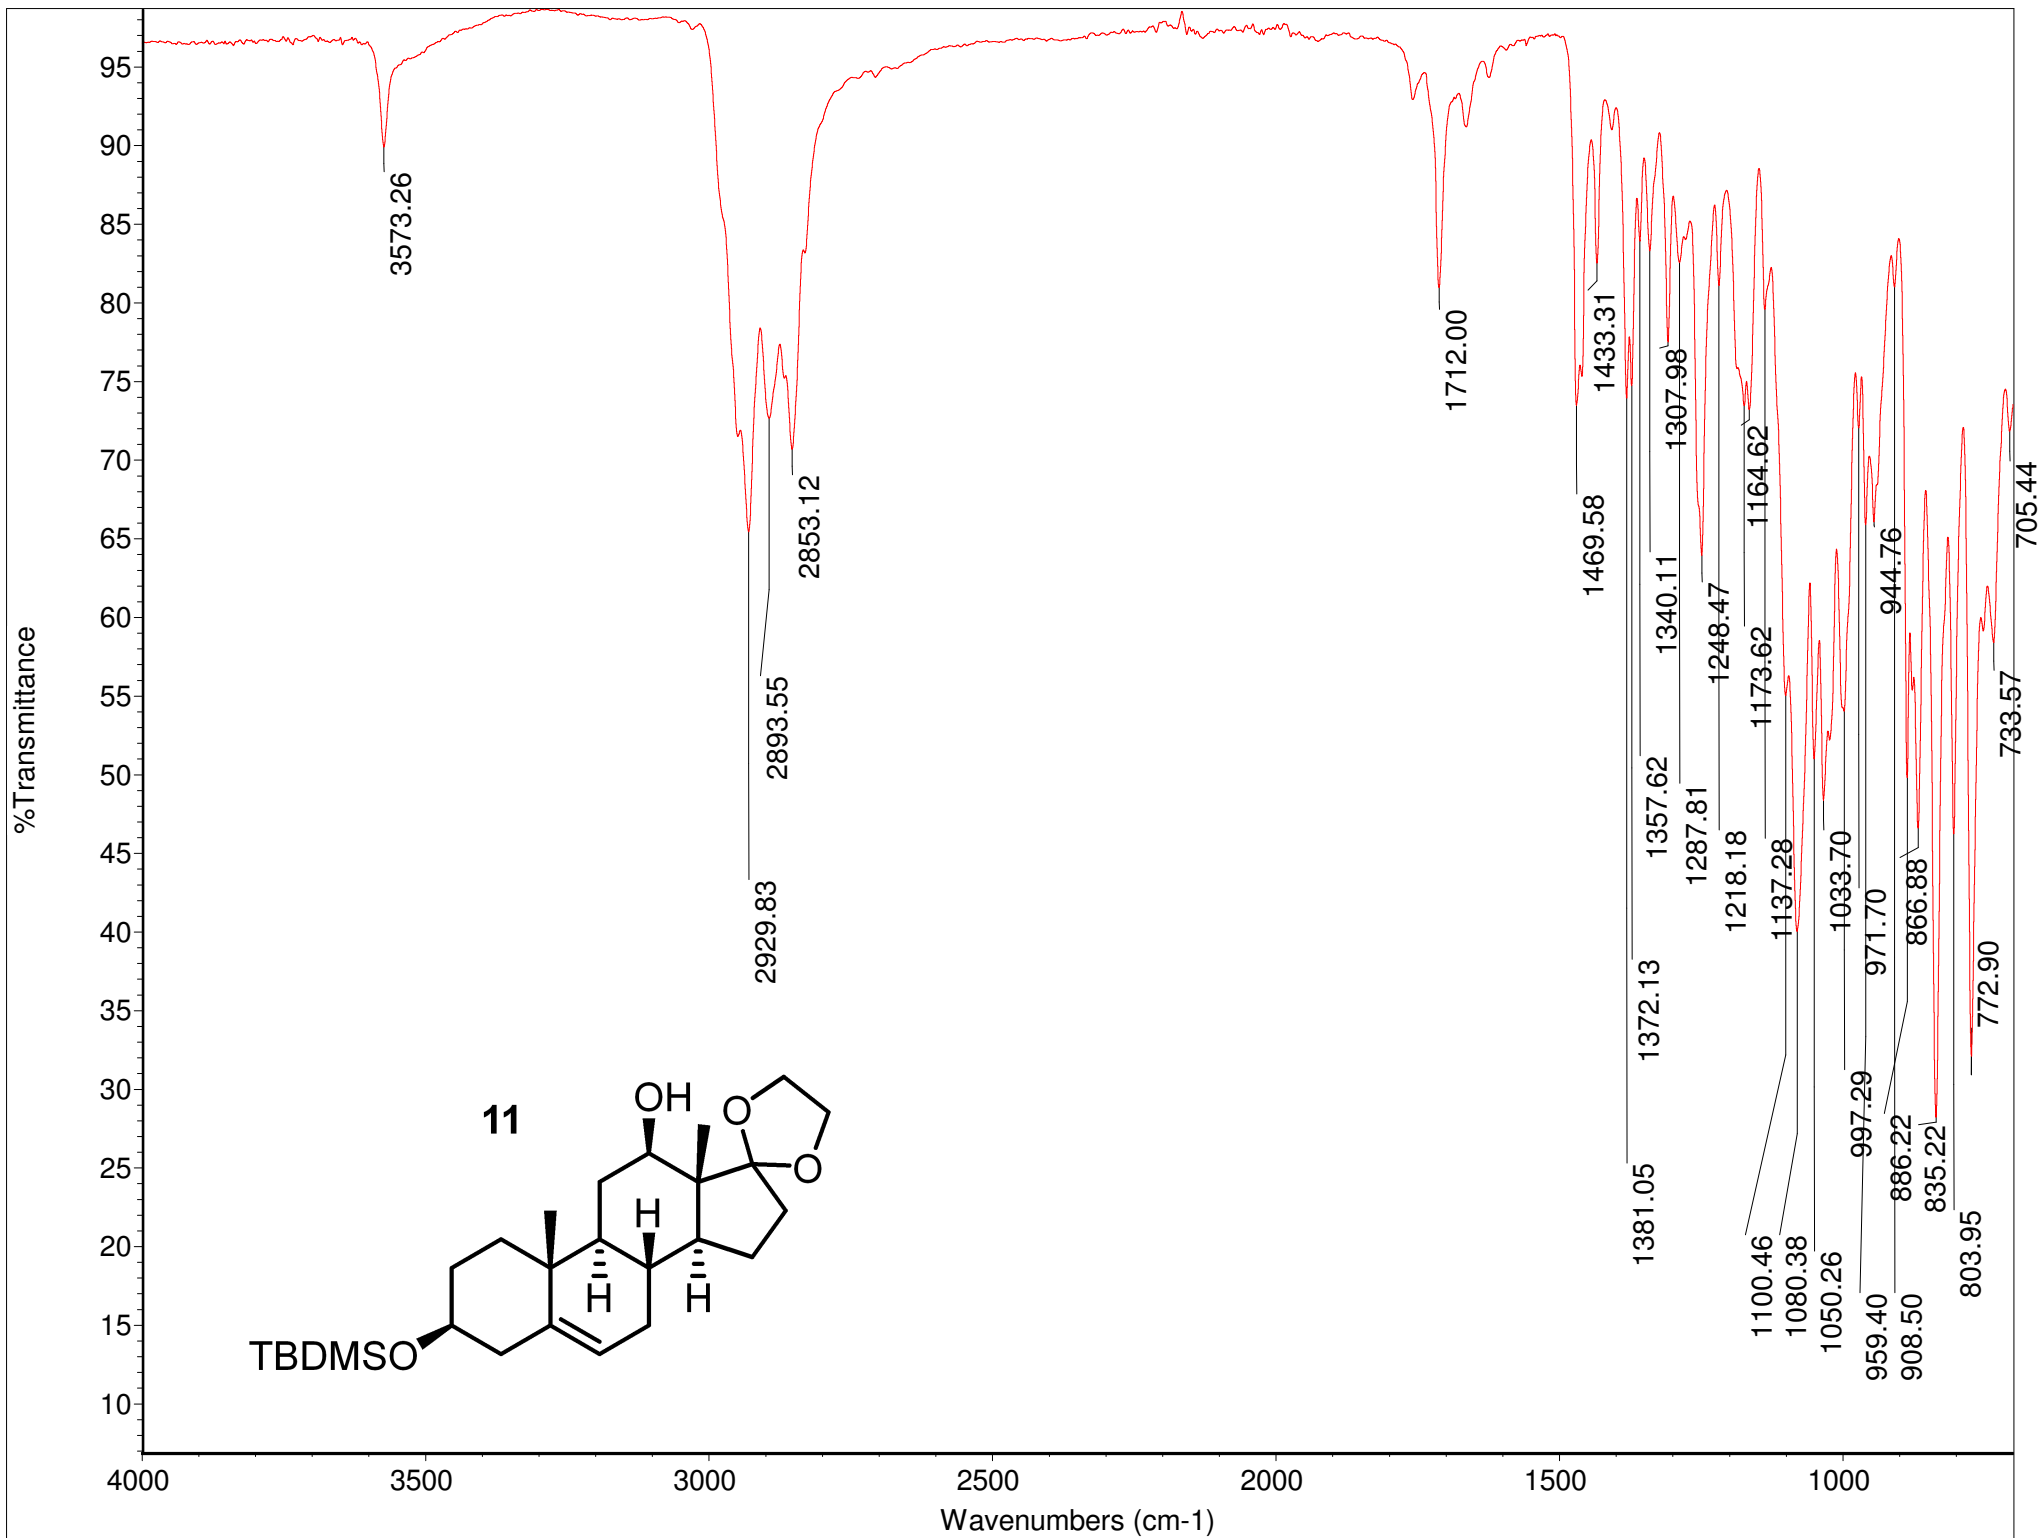

RT: 0.00 - 6.02

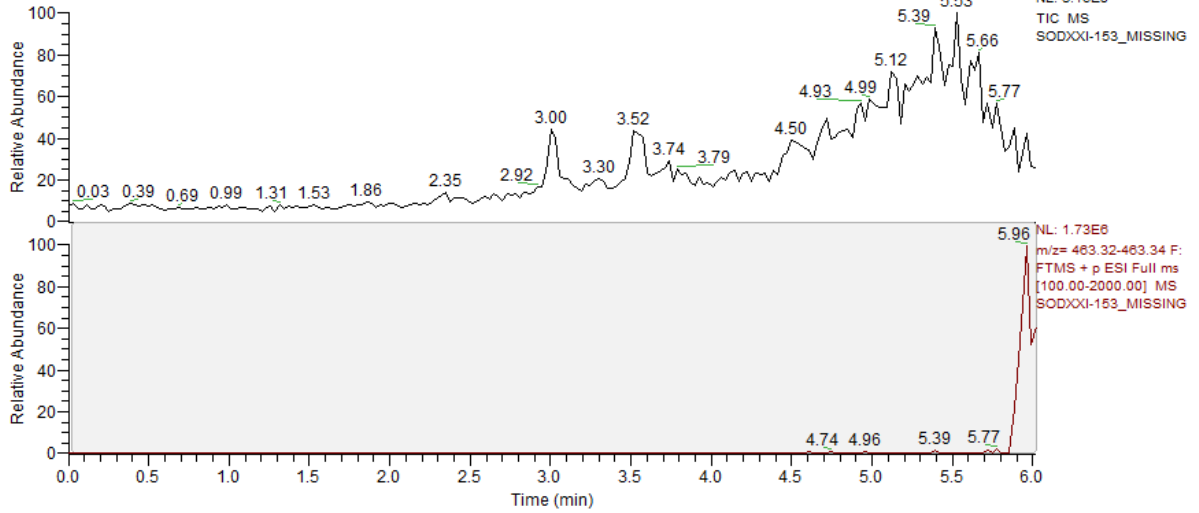

SODXXI-153\_MISSING #217-223 RT: 5.85-6.02 AV: 7 NL: 8.08E5  
F: FTMS + p ESI Full ms [100.00-2000.00]

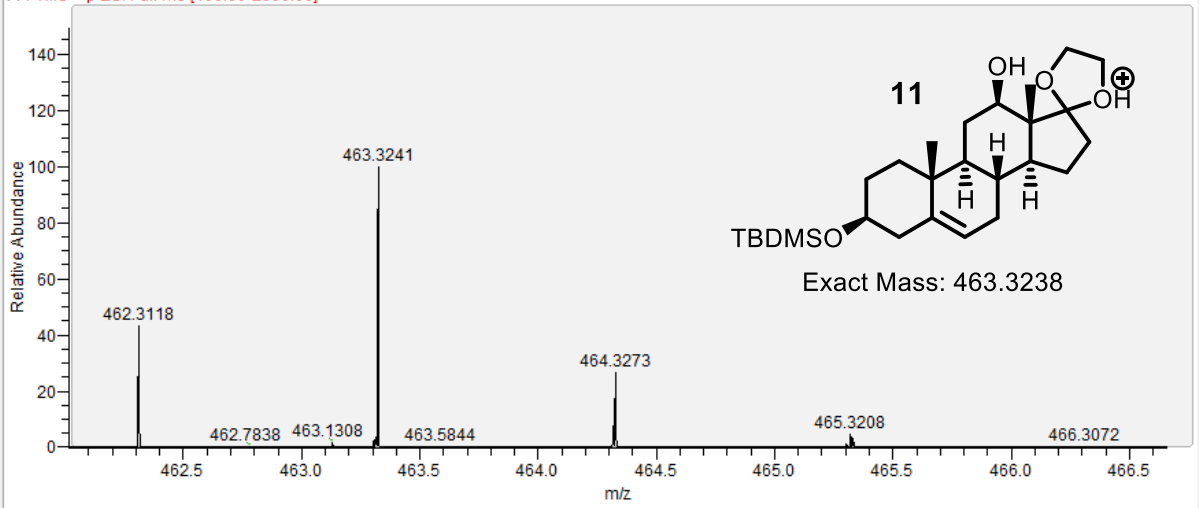

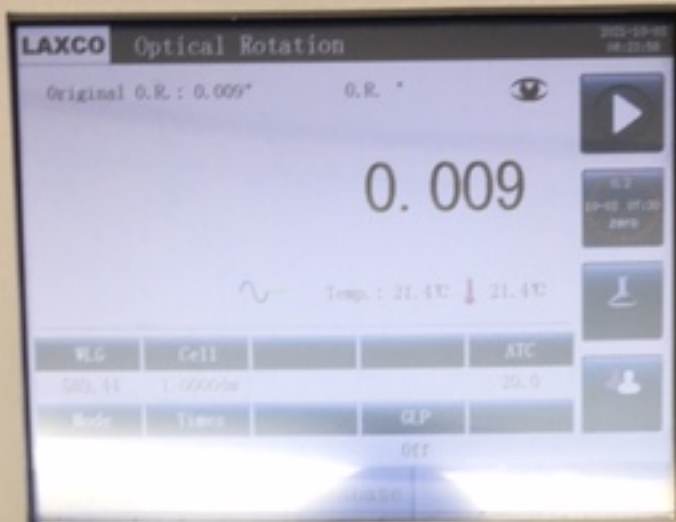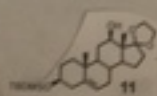

192mg

10 mL CHCl<sub>3</sub>

0.009

Current Data Parameters  
 NAME sbdxxr\_153\_612\_KETO [1H,13C] 10\_03\_2021  
 EXPNO 1  
 PROCNO 1

F2 - Acquisition Parameters  
 Date\_ 20211003  
 Time\_ 10.37 h  
 INSTRUM spect  
 PROBHD z149001\_0004 (zg30)  
 PULPROG 32768  
 TD 1  
 SOLVENT CDC13  
 NS 8  
 DS 0  
 SWH 10000.000 Hz  
 FIDRES 0.610352 Hz  
 AQ 1.6384000 sec  
 RG 28.76  
 DW 50.000 usec  
 DE 10.00 usec  
 TE 298.2 K  
 D1 1.00000000 sec  
 TD0 1  
 SFO1 500.1330883 MHz  
 NUC1 1H  
 P0 4.27 usec  
 P1 12.81 usec  
 PLW1 19.99900055 W

F2 - Processing parameters  
 SI 65536  
 SF 500.1300021 MHz  
 WDW EM  
 SSB 0  
 LB 0.30 Hz  
 GB 0  
 PC 1.00

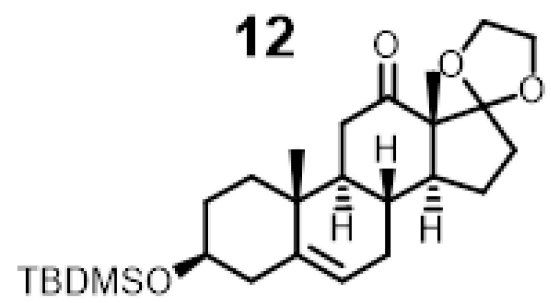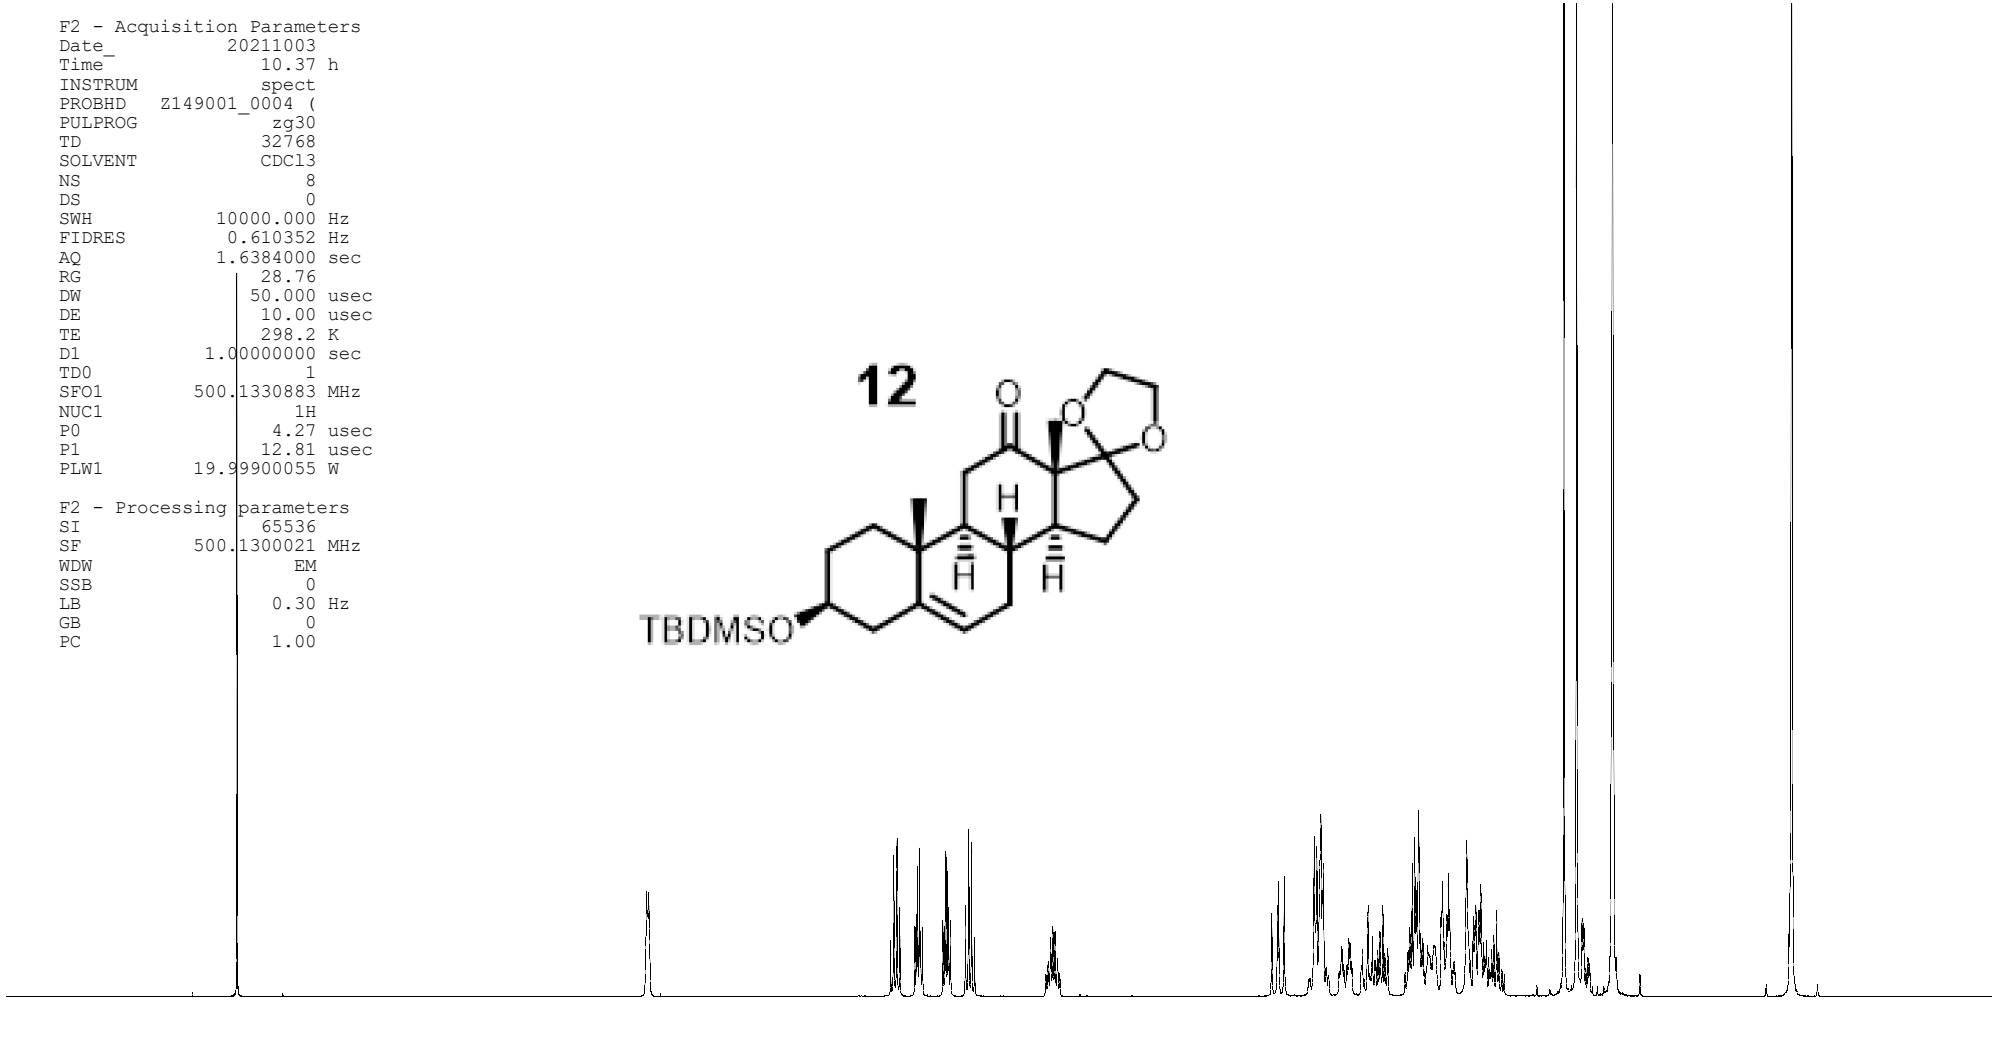

8.0 7.5 7.0 6.5 6.0 5.5 5.0 4.5 4.0 3.5 3.0 2.5 2.0 1.5 1.0 0.5 0.0 ppm

1.00  
 1.03  
 1.02  
 1.03  
 1.04  
 1.00  
 1.04  
 3.04  
 3.20  
 5.97  
 4.26  
 3.06  
 4.15  
 9.23  
 6.09



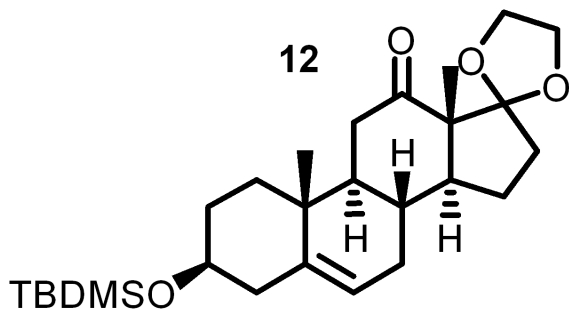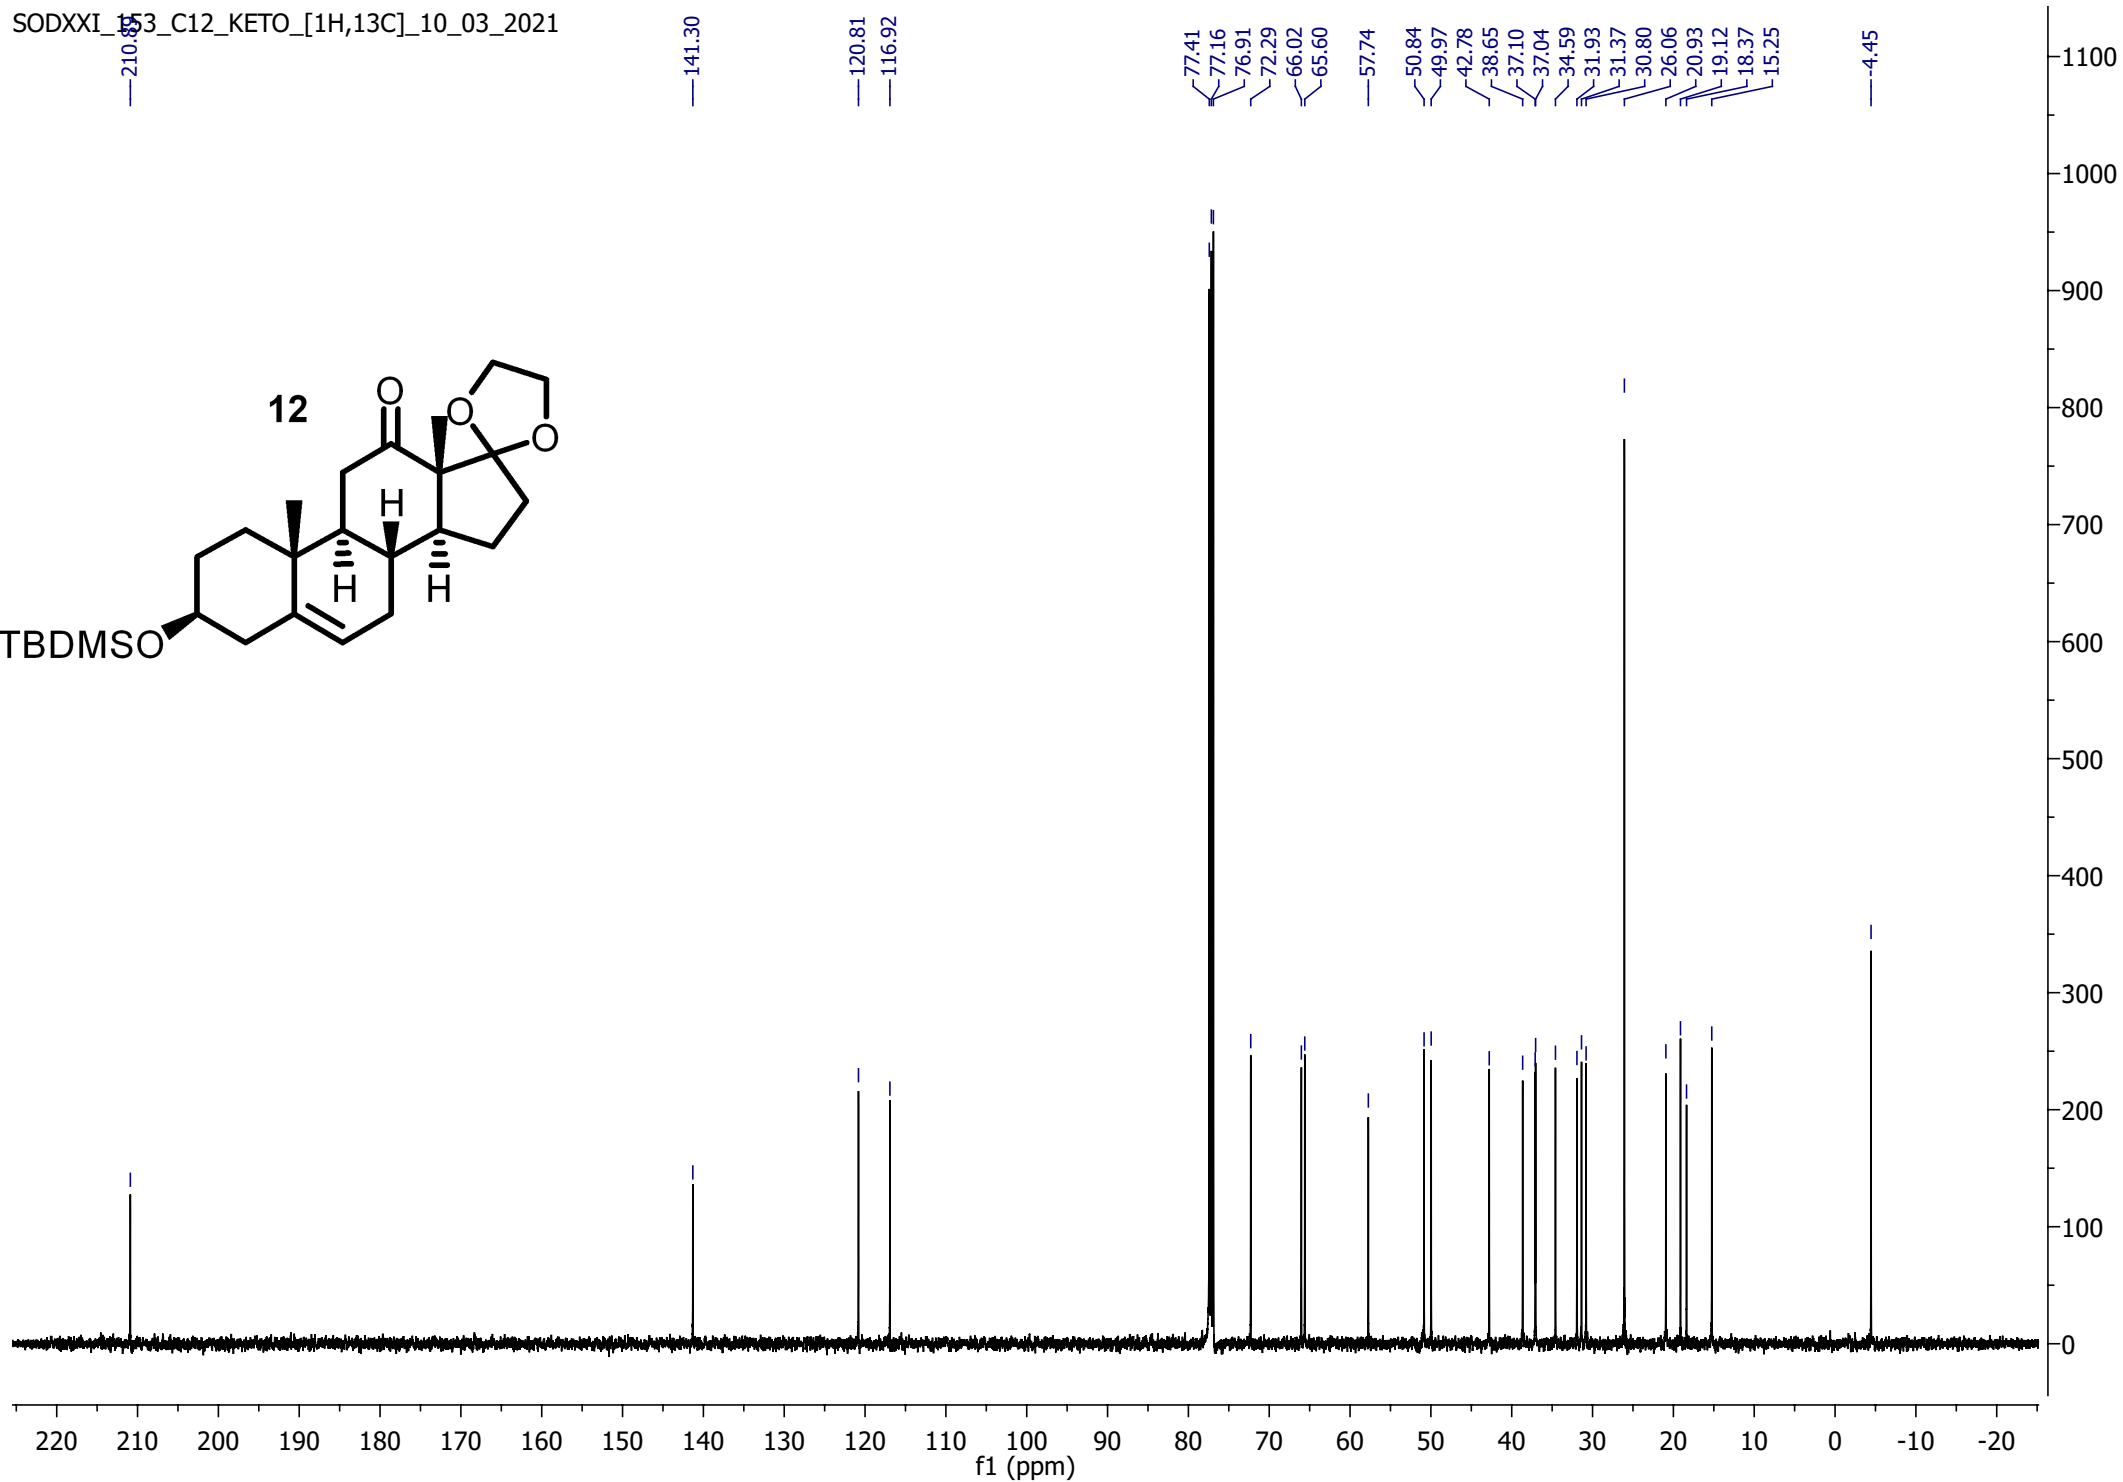

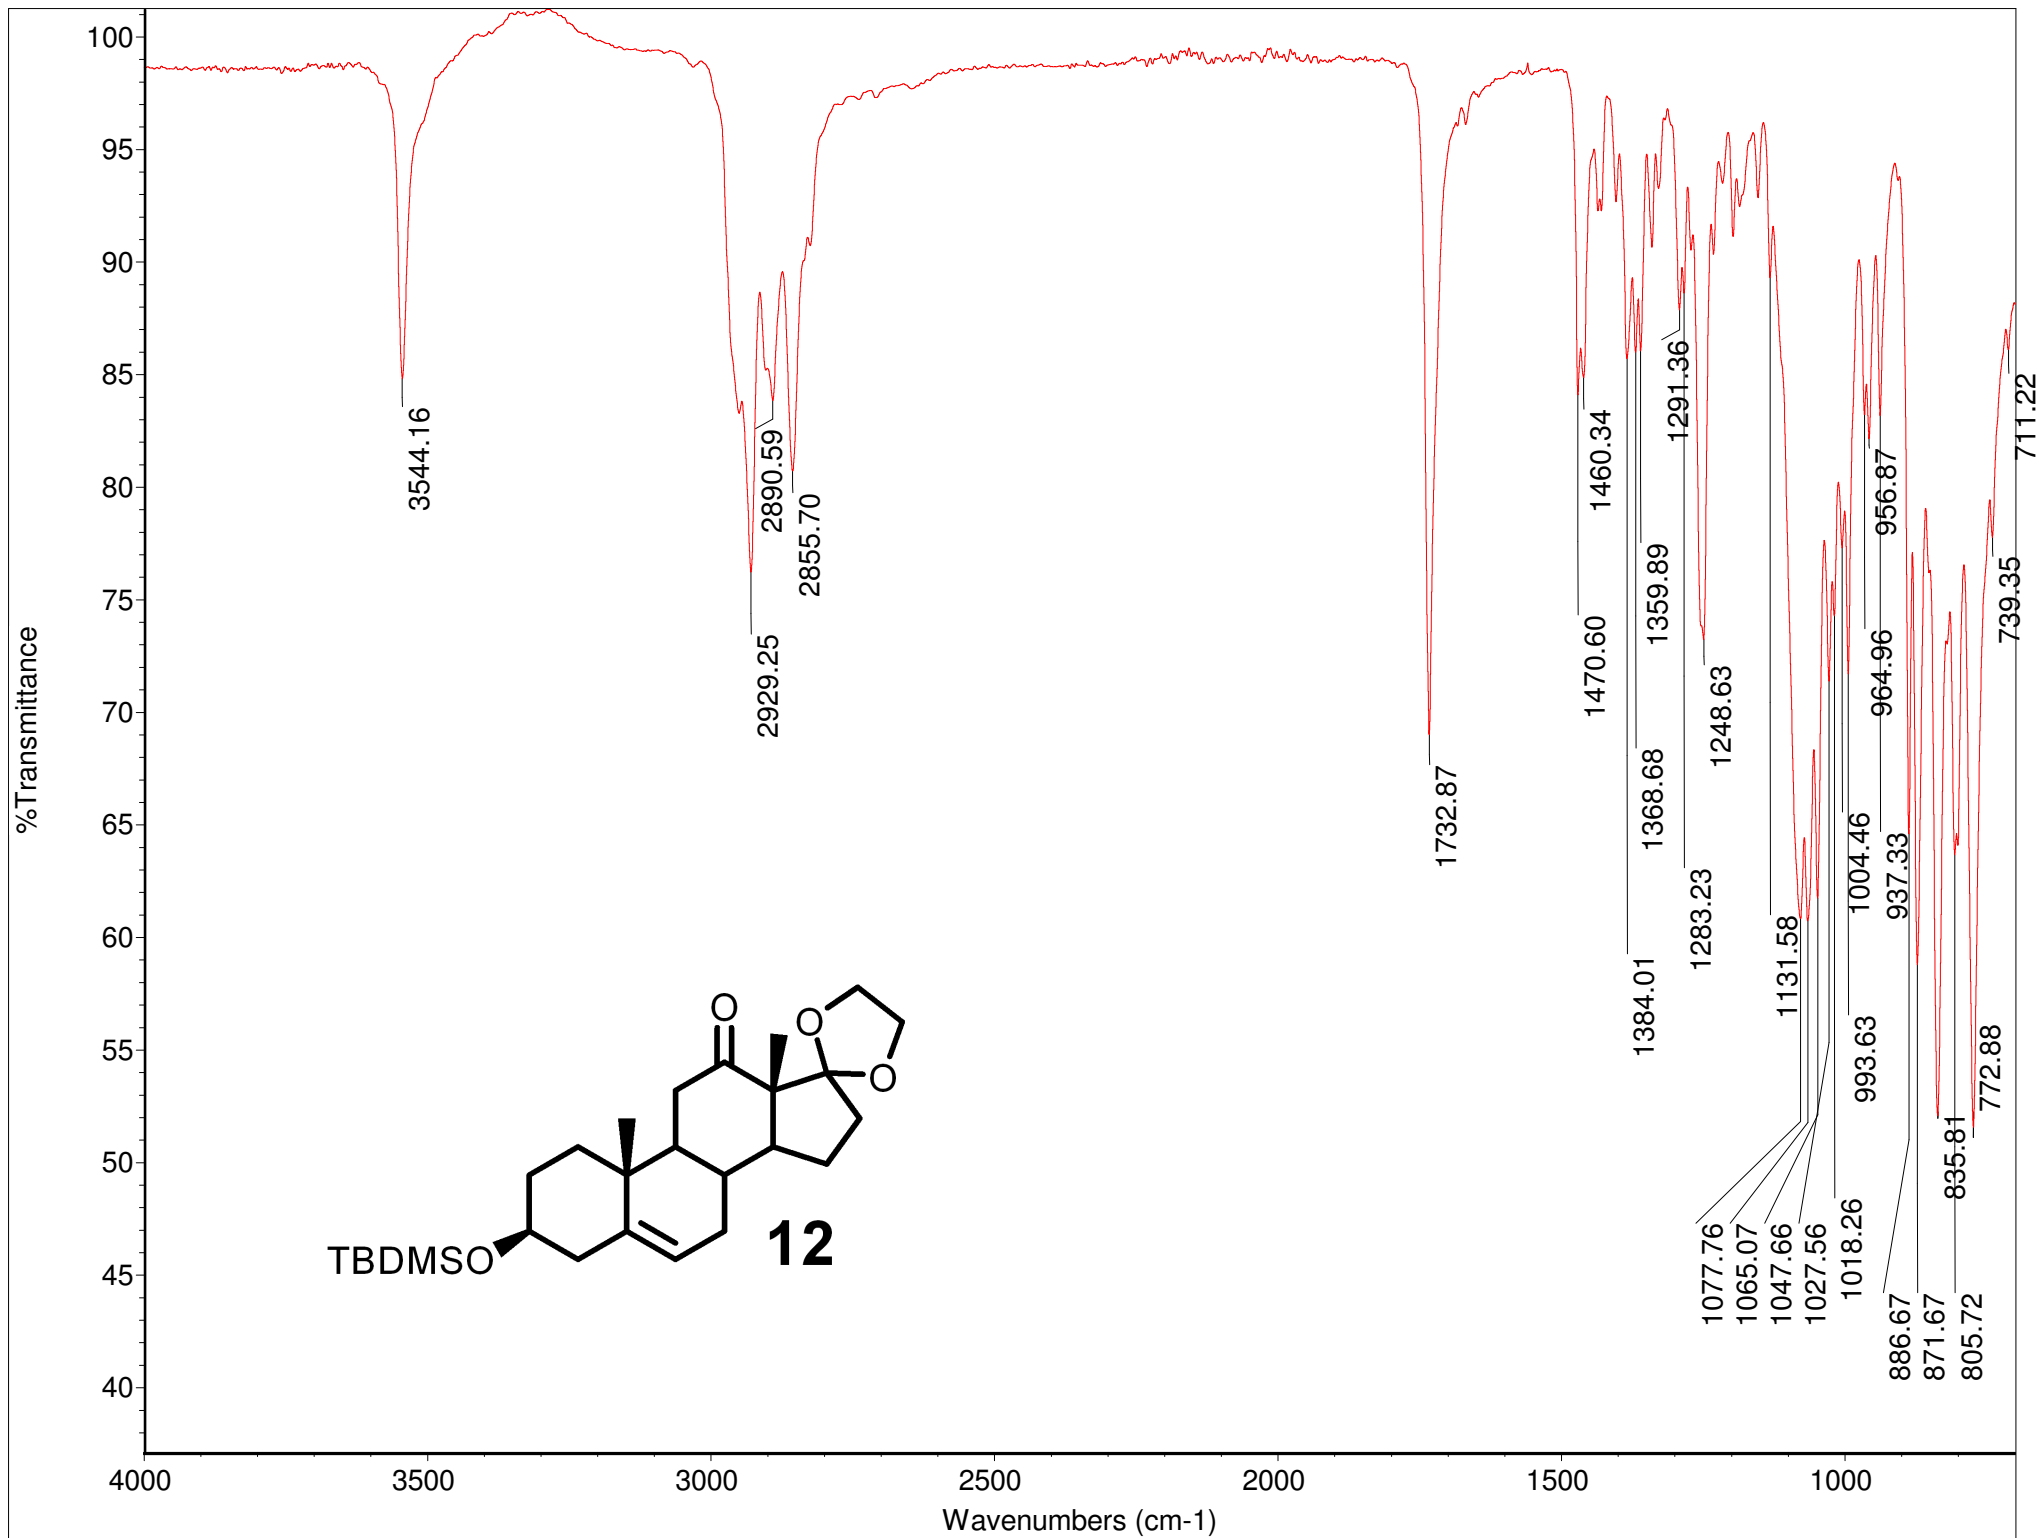

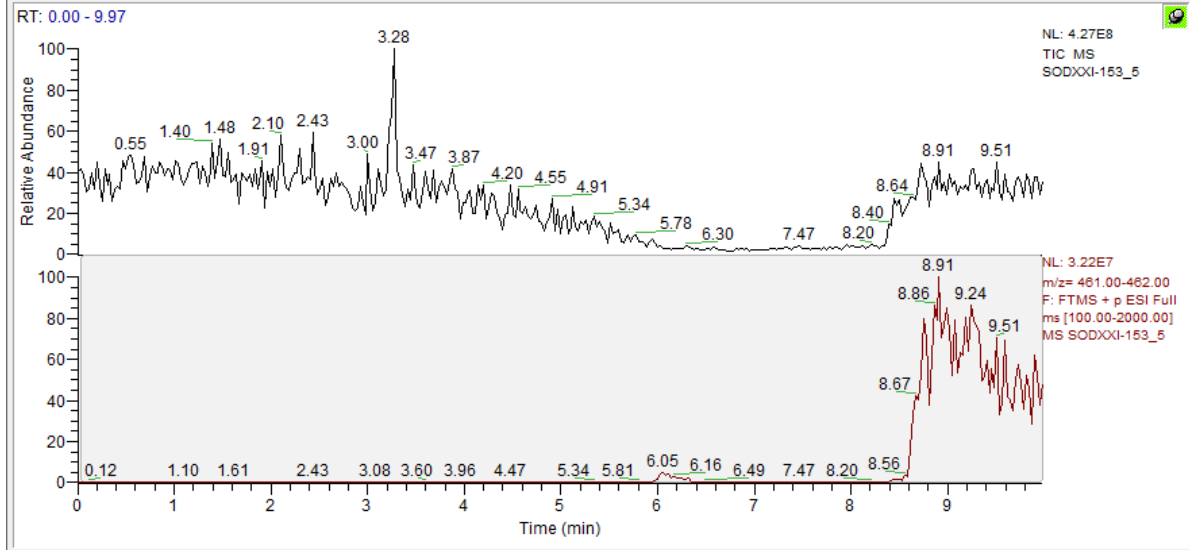

SODXXI-153\_5 #217-234 RT: 5.86-6.33 AV: 18 NL: 6.23E5  
F: FTMS + p ESI Full ms [100.00-2000.00]

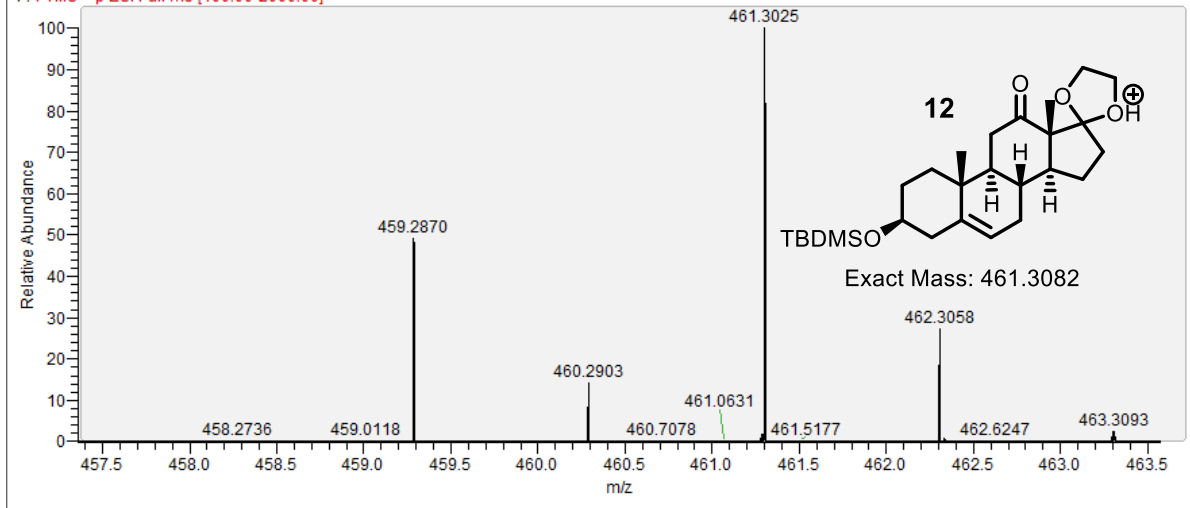

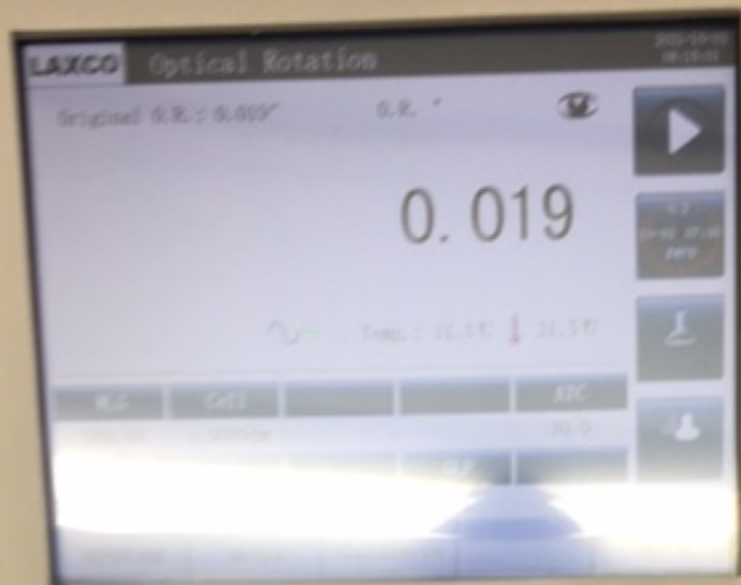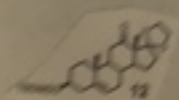

153mg  
 10 ml 0.09  
 CHCl<sub>3</sub>

Current Data Parameters  
 NAME SODXIX 174 FULL CLEAN HYDRAZONE 04 17 2021  
 EXPNO 1  
 PROCNO 1  
 F2 - Acquisition Parameters  
 Date\_ 20210417  
 Time 19.05 h  
 INSTRUM spect  
 PROBHD Z143298\_0003 (1  
 PULPROG zg30  
 TD 32768  
 SOLVENT CDCl3  
 NS 8  
 DS 0  
 SWH 10000.000 Hz  
 FIDRES 0.610352 Hz  
 AQ 1.6384000 sec  
 RG 61.72  
 DW 50.000 usec  
 DE 6.50 usec  
 TE 298.1 K  
 D1 1.00000000 sec  
 TDO 1  
 SFO1 500.1330883 MHz  
 NUC1 1H  
 FO 3.83 usec  
 F1 11.50 usec  
 PLWL 9.90830040 W  
 F2 - Processing parameters  
 SI 65536  
 SF 500.1300122 MHz  
 WDW EM  
 SSB 0  
 LB 0.30 Hz  
 GB 0  
 EC 1.00

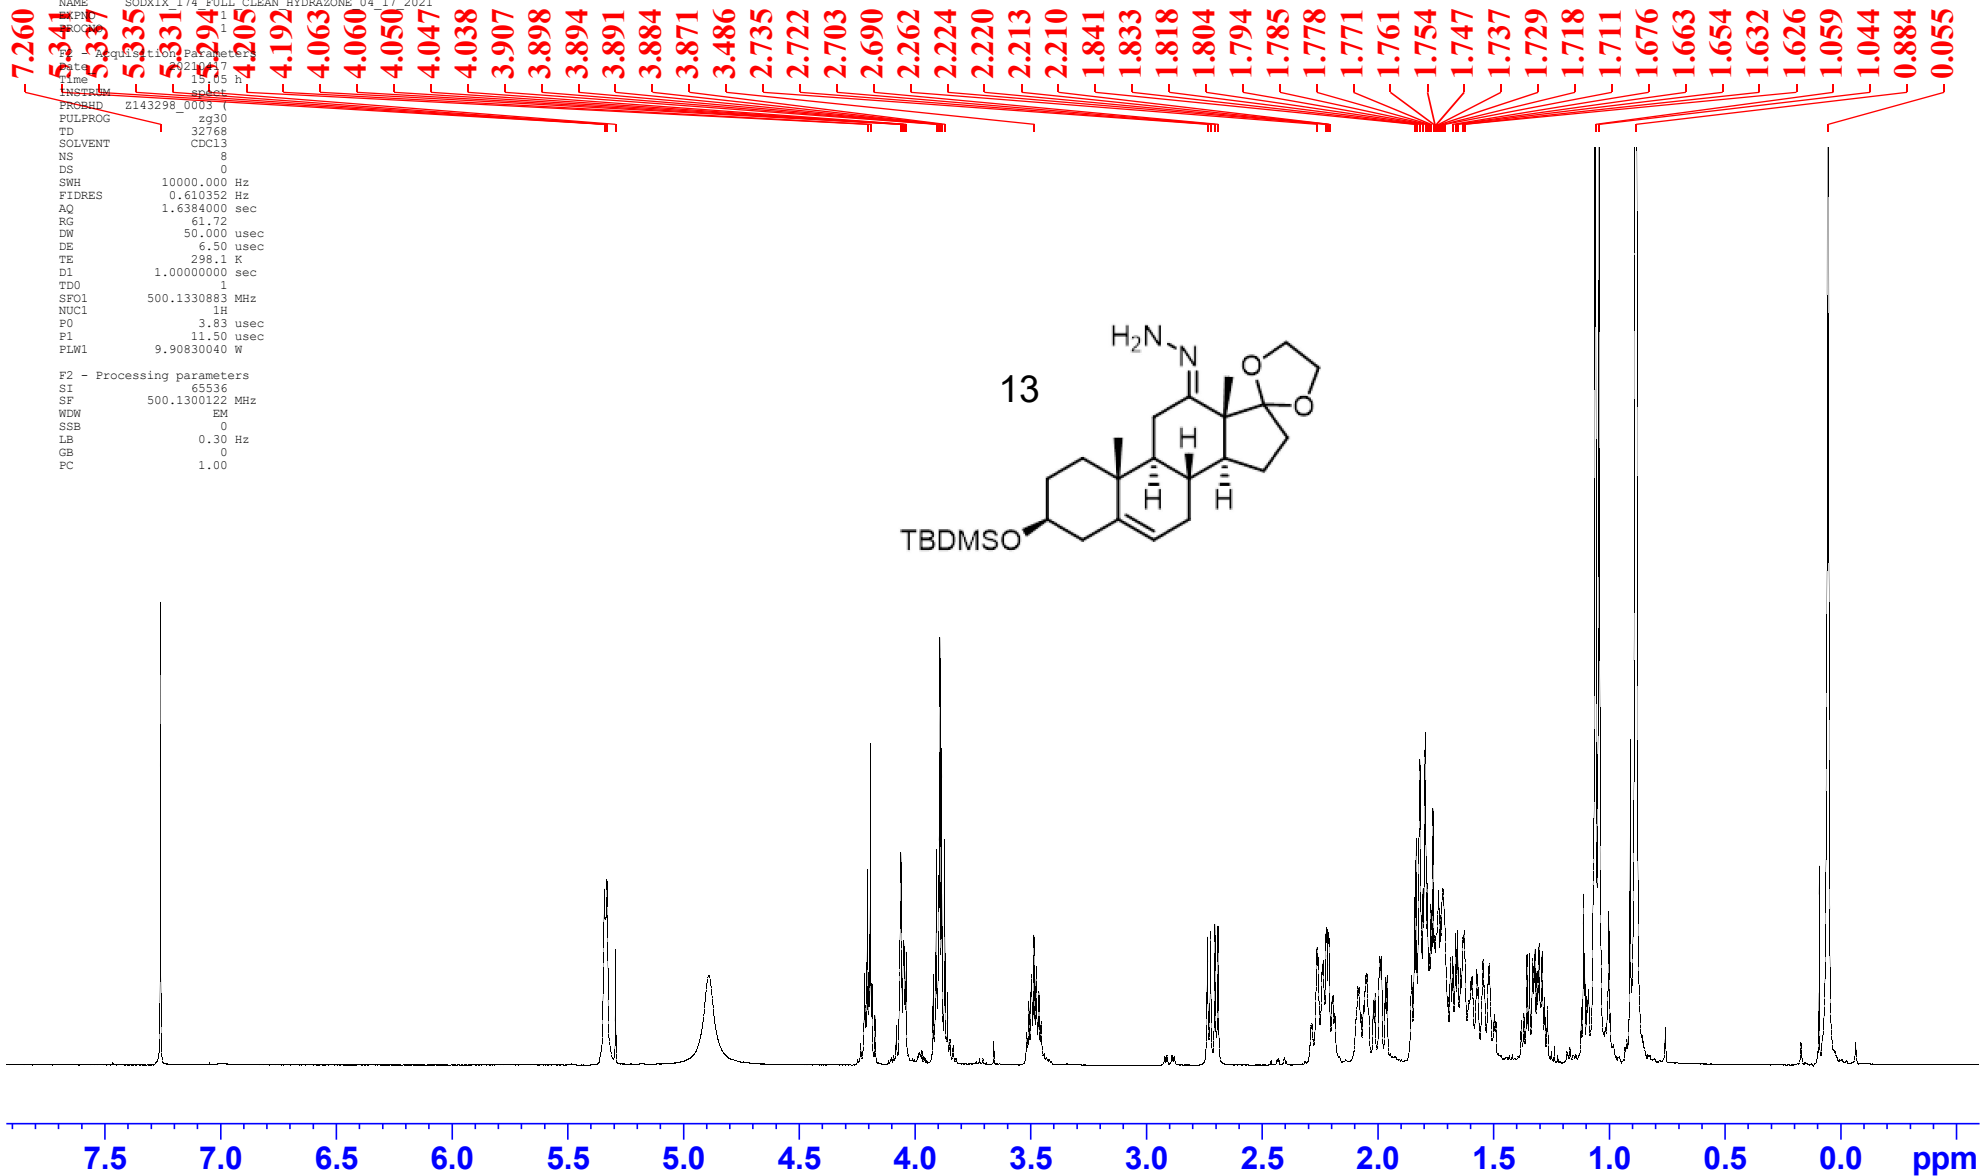

1.00  
1.54  
1.02  
1.03  
2.02  
1.04  
0.88  
2.18  
2.17  
10.35  
1.95  
0.72  
3.01  
2.94  
9.38  
6.17

Current Data Parameters  
NAME S0DXIX\_174\_FULL\_CLEAN\_HYDRAZONE\_04\_17\_2021  
EXPNO 3  
PROCNO 1

F2 - Acquisition Parameters  
Date\_ 20210417  
Time\_ 15.54 h  
INSTRUM spect  
PROBHD z143298\_0003 ( udefc  
FULPROG 21424  
TD 21424  
SOLVENT CDCl3  
NS 512  
DS 0  
SWH 29761.904 Hz  
FIDRES 2.778370 Hz  
AQ 0.3599232 sec  
RG 185.92  
DW 16.800 usec  
DE 8.31 usec  
TE 298.2 K  
D1 4.0000000 sec  
D12 0.0002000 sec  
D20 20.0000000 sec  
TDO 1  
SFO1 125.7703643 MHz  
NUC1 13C  
P1 18.25 usec  
P13 2000.00 usec  
PZ6 500.00 usec  
PLW1 115.08000183 W  
SPNAM[5] Crp60comp.4  
SPOAL5 0.500  
SPOFFS5 0 Hz  
SPW5 58.56200027 W  
SPNAM[8] Crp60,0.5,20.1  
SPOAL8 0.500  
SPOFFS8 0 Hz  
SPW8 58.56200027 W  
SFO2 500.1320005 MHz  
NUC2 1H  
CPDPRG[2] waltz16  
PCPD2 80.00 usec  
PLW2 9.90830040 W  
PLW12 0.20475000 W

F2 - Processing parameters  
SI 131072  
SF 125.7577750 MHz  
WDW EM  
SSB 0  
LB 2.00 Hz  
GB 0  
PC 1.40

154.79

141.33

121.03

118.48

77.39

72.27

65.75

65.29

51.53

49.81

49.02

42.80

37.27

37.25

35.14

31.98

31.55

31.03

26.04

21.25

20.08

19.08

18.34

17.03

-4.47

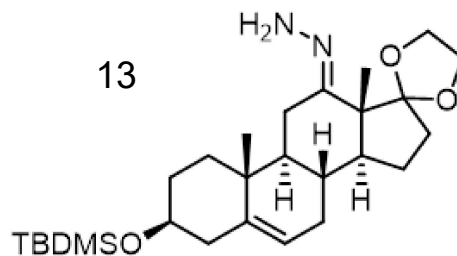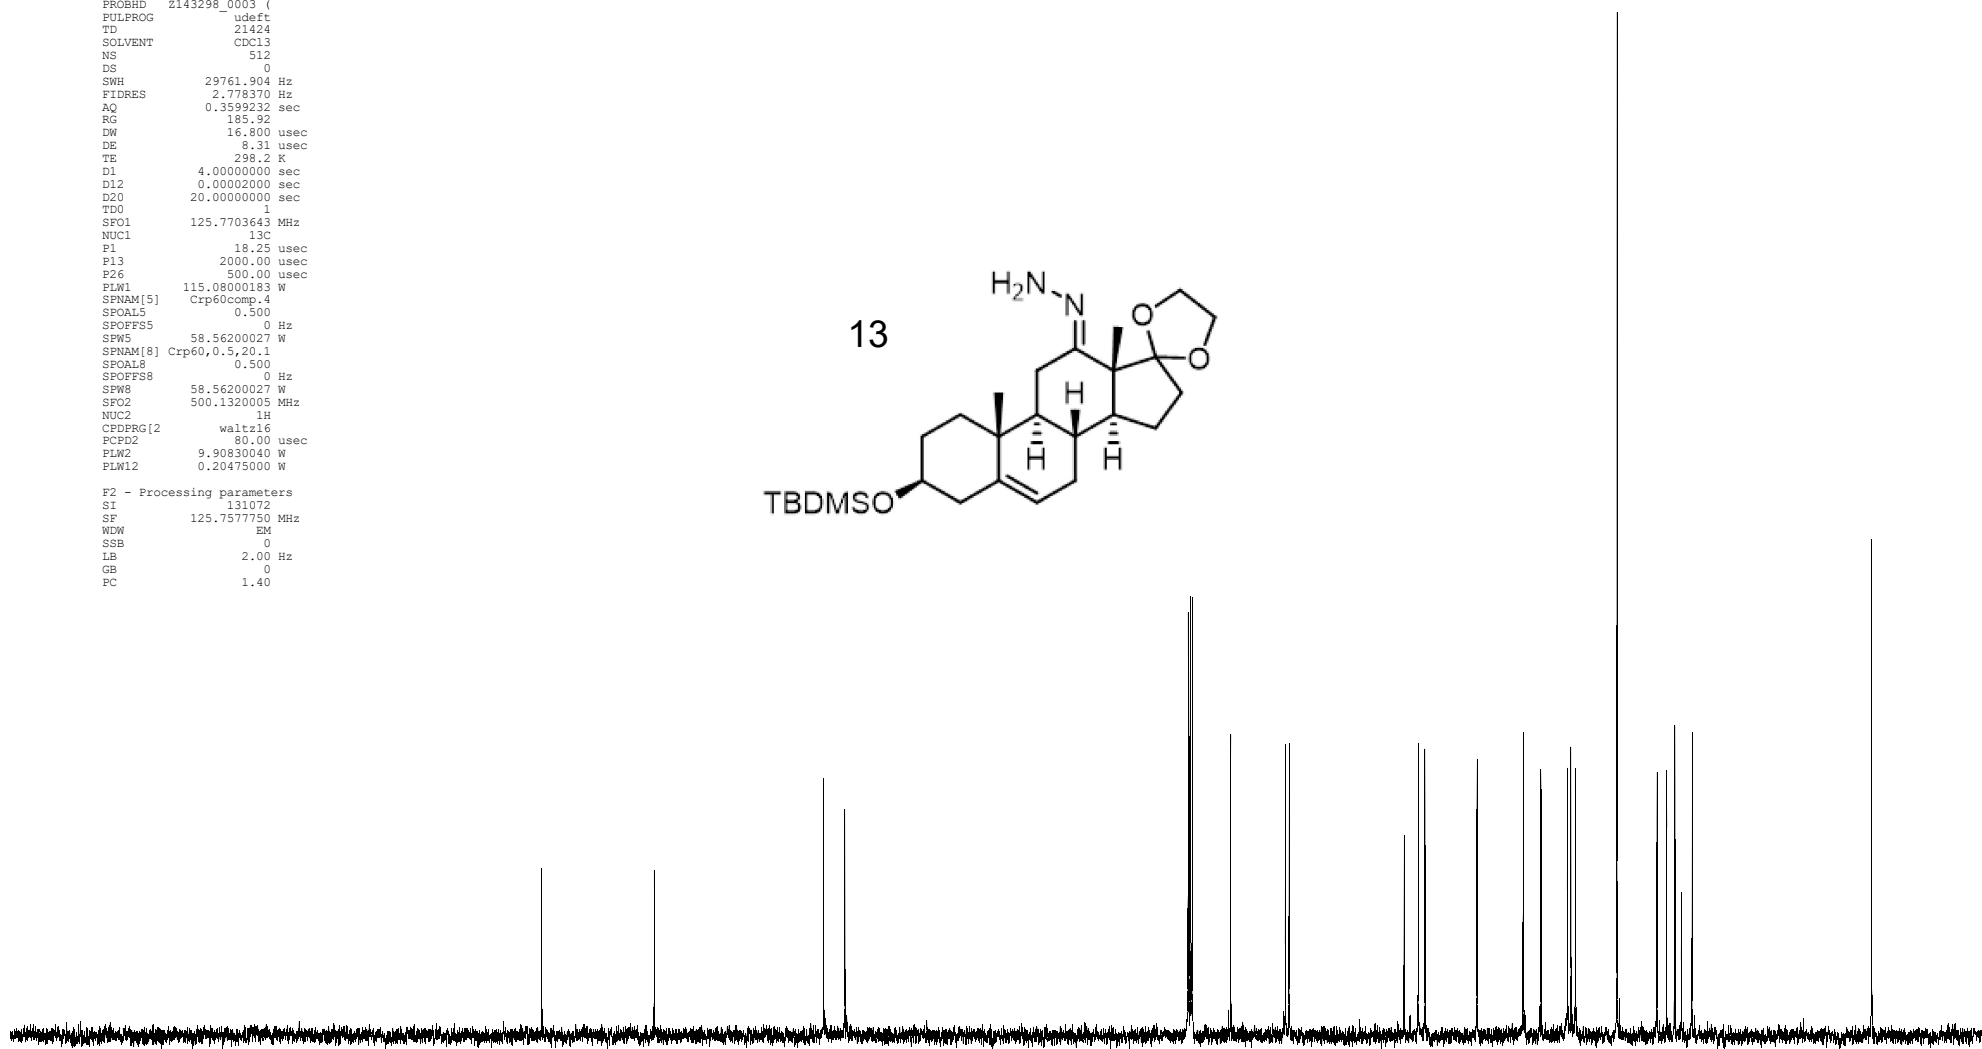

210 200 190 180 170 160 150 140 130 120 110 100 90 80 70 60 50 40 30 20 10 0 ppm

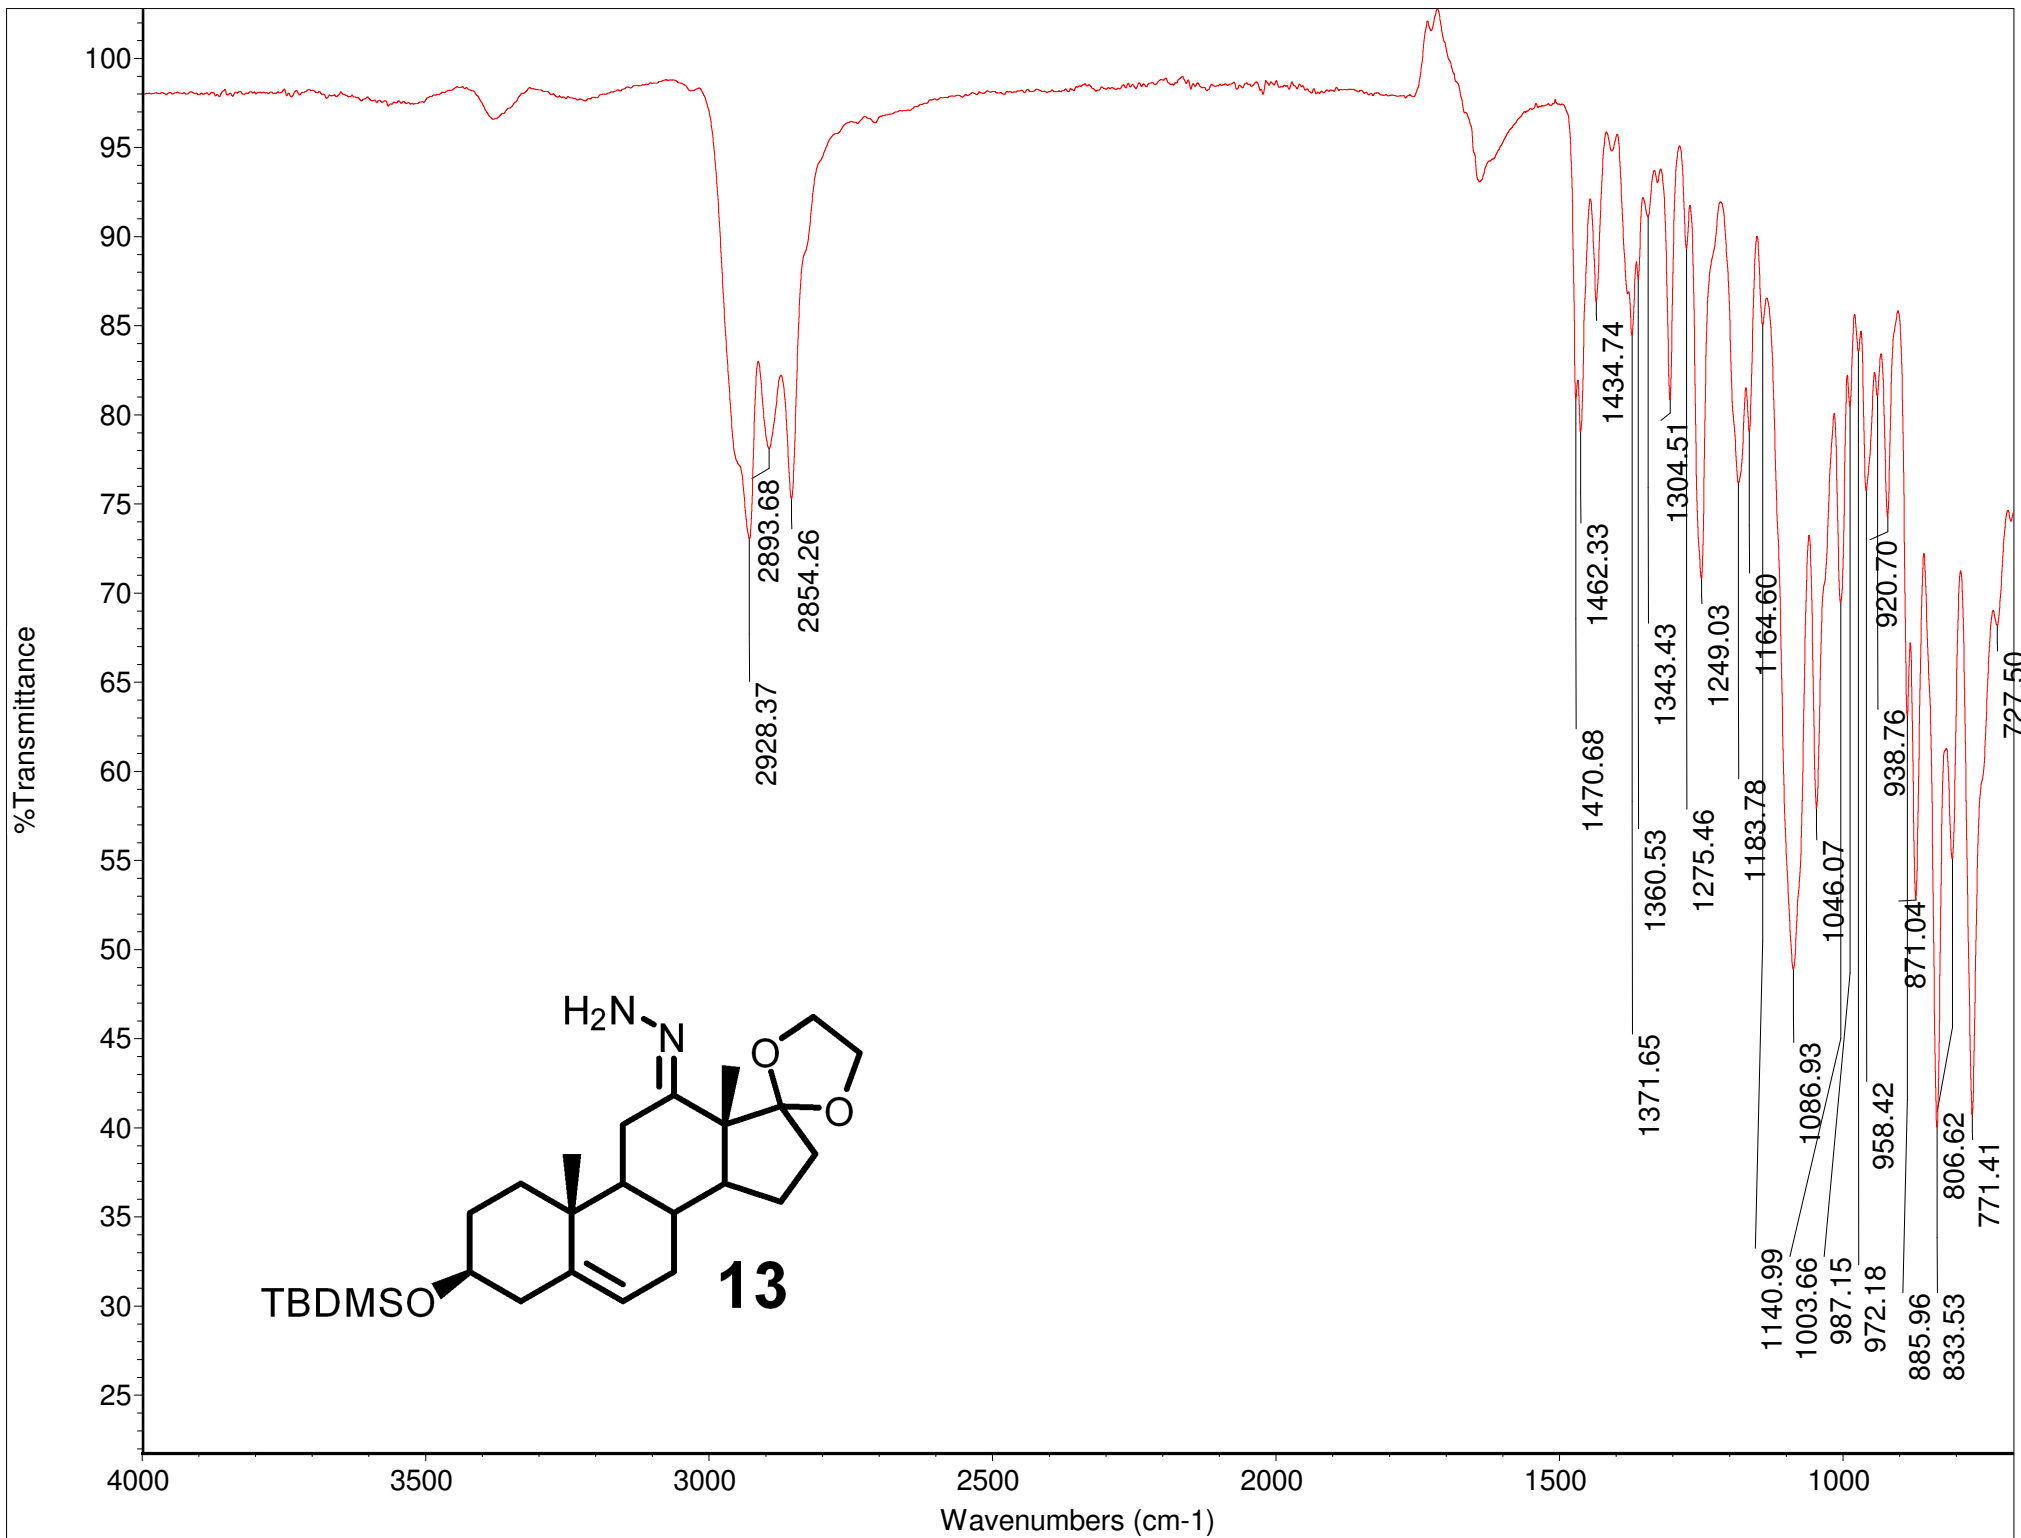

RT: 0.00 - 10.00

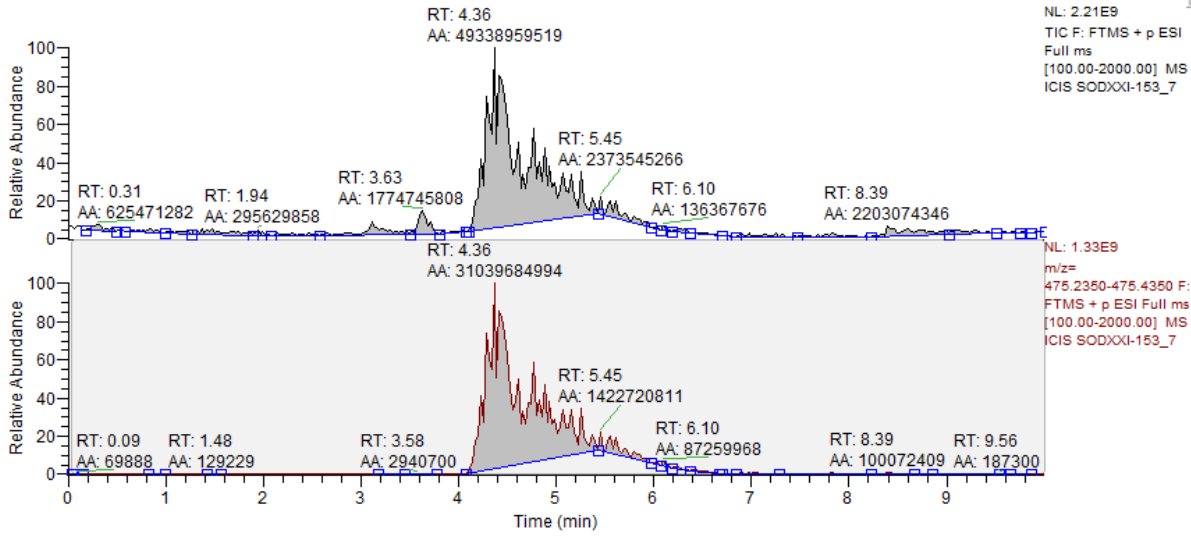

SODXXI-153\_7 #152-204 RT: 4.09-5.50 AV: 53 NL: 4.03E8  
F: FTMS + p ESI Full ms [100.00-2000.00]

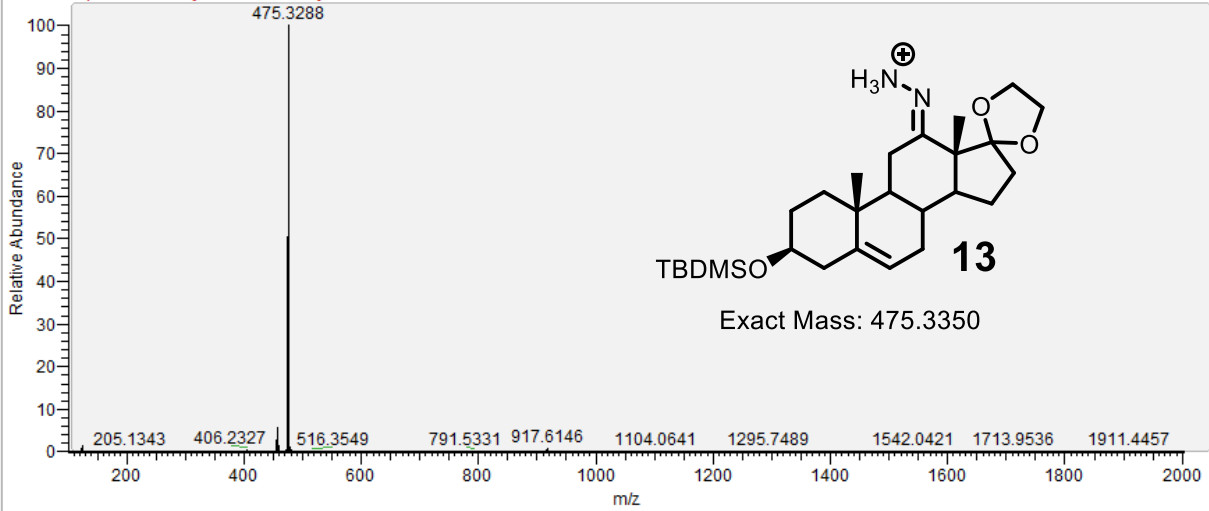

NUM

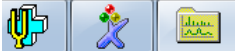



Original O.R. : -0.120\*

O.R. \*

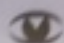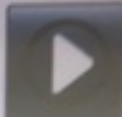

-0.120

0.3  
10-03 08:29  
zero

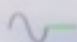

Temp. : 21.6°C ↓ 21.5°C

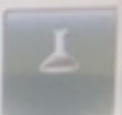

589.44 1.000000

Mode

Times

GLP

single

1

Off

system

menu

database

save

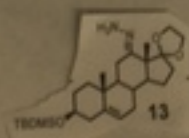

14.4 mg

10 ml

CHCl<sub>3</sub>

- 0.120

7.260  
6.935  
6.321  
5.367  
5.358  
4.216  
4.208  
4.202  
4.199  
4.197  
4.196  
4.192  
4.178  
3.981  
3.974  
3.962  
3.958  
3.955  
3.943  
3.939  
3.930  
3.925  
2.213  
2.210  
2.196  
2.187  
2.181  
2.174  
1.966  
1.926  
1.922  
1.905  
1.901  
1.888  
1.885  
1.881  
1.870  
1.853  
1.845  
1.837  
1.832  
1.823  
1.738  
1.731  
1.702  
1.678  
1.667  
1.653  
1.649  
1.640  
1.627  
0.883

```

NAME: 14
EXPNO: 2
PROCNO: 1
PROCNAME: 14
PULPROG: zgpg30
TD: 65536
SOLVENT: DMSO
NS: 8
DS: 4
SWH: 10000.000 KHz
F2: 500.130120 MHz
AQ: 1.6384000 sec
RG: 256
DE: 50.000 usec
TE: 298.15 K
D1: 1.0000000 sec
TDO: 0
SFO1: 500.130883 MHz
MUL1: 8
FO: 3.83 usec
PI: 11.50 usec
PL1: 9.90830040 W
F2 - Processing parameters
SI: 65536
SF: 500.130120 MHz
WDW: EM
SSB: 0
LB: 0.30 Hz
GB: 0
PC: 1.00
  
```

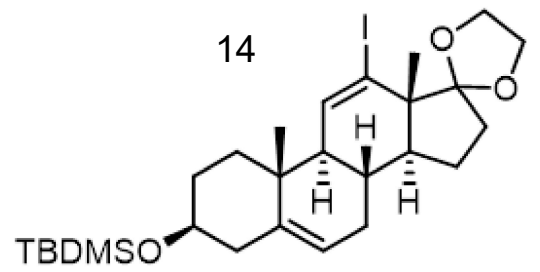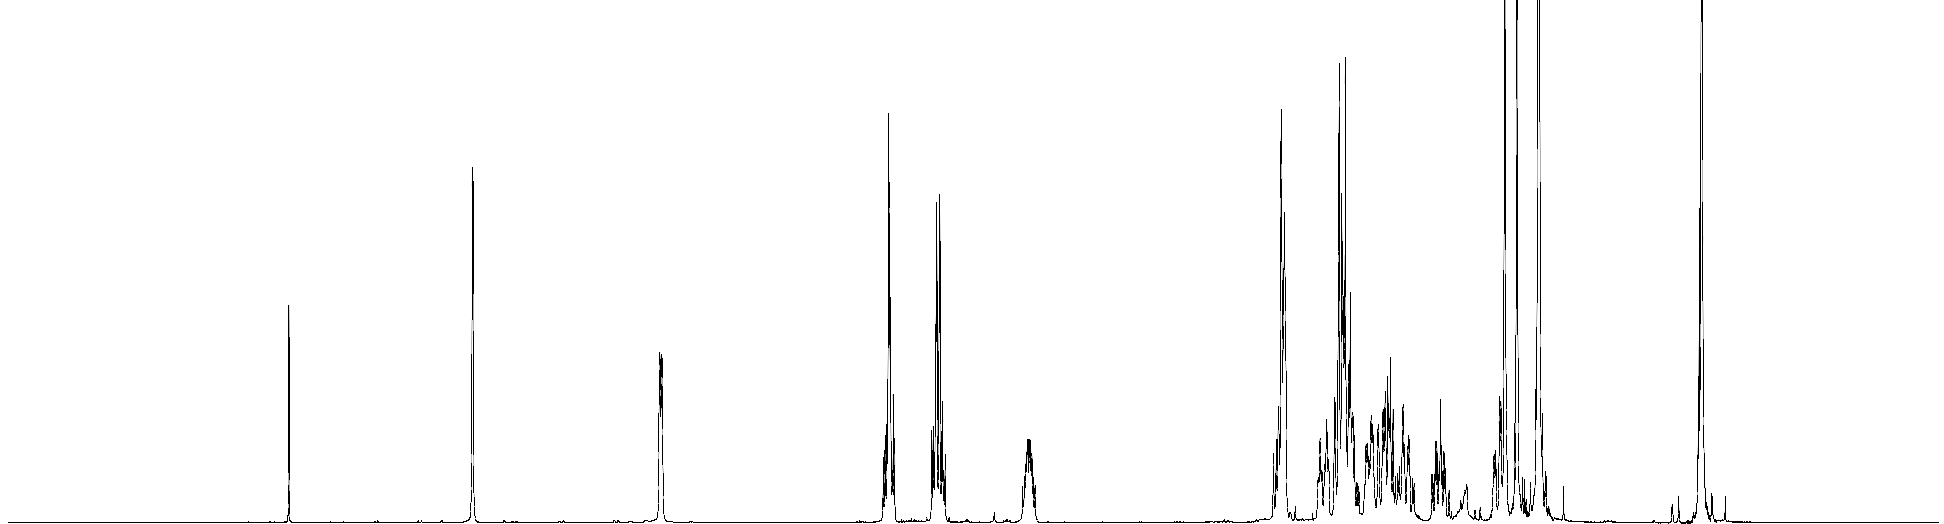

8.5 8.0 7.5 7.0 6.5 6.0 5.5 5.0 4.5 4.0 3.5 3.0 2.5 2.0 1.5 1.0 0.5 0.0 -0.5 ppm

1.00 1.05 2.05 2.11 1.08 3.20 1.13 5.26 4.83 1.15 0.94 3.24 3.05 9.78 6.85

```

Current Data Parameters
NAME      SDEKIX_153_FUL_PURE_R279_C3_OTRMS_V1_100IDR_C17_METAL_04_02_2021
EXPNO    1
PROCNO   1

F2 - Acquisition Parameters
Date_    20210405
Time     11:39 h
INSTRUM  spect
PROBHD   z143298_003 1
PULPROG  zgpg30
TD        65536
SOLVENT  CDCl3
NS        64
DS        0
SWE       29761.904 Hz
FIDRES    2.778379 Hz
AQ        0.3599232 sec
RG         385.52
DM         16.800 usec
DE         9.23 usec
TE        298.15 K
D1         4.00000000 sec
D12        0.00020000 sec
D20        20.00000000 sec
TSD
SFO1      125.7703643 MHz
NUC1       13C
P1         18.20 usec
P12        2000.00 usec
P2         500.00 usec
PL1        115.08000183 W
SFO2      50.6182550 MHz
SFO3      101.2365100 MHz
SFO4      151.8547650 MHz
SFO5      202.4729200 MHz
SFO6      253.0911750 MHz
SFO7      303.7094300 MHz
SFO8      354.3276850 MHz
SFO9      404.9559400 MHz
SFO10     455.5841950 MHz
SFO11     506.2124500 MHz
SFO12     556.8407050 MHz
SFO13     607.4689600 MHz
SFO14     658.0972150 MHz
SFO15     708.7254700 MHz
SFO16     759.3537250 MHz
SFO17     809.9819800 MHz
SFO18     860.6102350 MHz
SFO19     911.2384900 MHz
SFO20     961.8667450 MHz
SFO21     1012.4950000 MHz
SFO22     1063.1232550 MHz
SFO23     1113.7515100 MHz
SFO24     1164.3797650 MHz
SFO25     1215.0080200 MHz
SFO26     1265.6362750 MHz
SFO27     1316.2645300 MHz
SFO28     1367.4927850 MHz
SFO29     1418.1210400 MHz
SFO30     1469.5492950 MHz
SFO31     1521.3770500 MHz
SFO32     1573.8048050 MHz
SFO33     1626.2325600 MHz
SFO34     1678.6503150 MHz
SFO35     1731.1260700 MHz
SFO36     1783.6518250 MHz
SFO37     1837.2382800 MHz
SFO38     1890.8707350 MHz
SFO39     1944.5281900 MHz
SFO40     1998.2846450 MHz
SFO41     2057.3171000 MHz
SFO42     2117.9675550 MHz
SFO43     2178.3250100 MHz
SFO44     2239.3974650 MHz
SFO45     2300.0899200 MHz
SFO46     2362.5223750 MHz
SFO47     2427.1178300 MHz
SFO48     2492.1497850 MHz
SFO49     2558.2857400 MHz
SFO50     2625.5276950 MHz
SFO51     2693.9656500 MHz
SFO52     2761.2036050 MHz
SFO53     2830.5295600 MHz
SFO54     2900.5815150 MHz
SFO55     2971.9234700 MHz
SFO56     3044.4454250 MHz
SFO57     3119.8293800 MHz
SFO58     3196.7432850 MHz
SFO59     3275.1871900 MHz
SFO60     3356.0609950 MHz
SFO61     3437.3548000 MHz
SFO62     3520.4923050 MHz
SFO63     3607.9786100 MHz
SFO64     3688.6199150 MHz
SFO65     3772.4272200 MHz
SFO66     3859.8841250 MHz
SFO67     3943.8640300 MHz
SFO68     4031.5600350 MHz
SFO69     4122.9721400 MHz
SFO70     4216.4922450 MHz
SFO71     4304.4383500 MHz
SFO72     4394.8184550 MHz
SFO73     4487.6335600 MHz
SFO74     4583.8476650 MHz
SFO75     4676.1707700 MHz
SFO76     4771.8228750 MHz
SFO77     4869.5930800 MHz
SFO78     4970.9812850 MHz
SFO79     5075.0874900 MHz
SFO80     5182.9127000 MHz
SFO81     5292.6593050 MHz
SFO82     5405.1868100 MHz
SFO83     5520.5004150 MHz
SFO84     5637.5930200 MHz
SFO85     5758.4656250 MHz
SFO86     5888.2272300 MHz
SFO87     6021.8118350 MHz
SFO88     6168.8284400 MHz
SFO89     6319.5160450 MHz
SFO90     6476.8871500 MHz
SFO91     6638.1317550 MHz
SFO92     6805.1928600 MHz
SFO93     6978.0604650 MHz
SFO94     7157.8445700 MHz
SFO95     7344.3511750 MHz
SFO96     7537.6522800 MHz
SFO97     7738.7708850 MHz
SFO98     7940.7014900 MHz
SFO99     8149.5421000 MHz
SFO100    8356.2827050 MHz
SFO101    8570.8843100 MHz
SFO102    8783.4459150 MHz
SFO103    9003.9675200 MHz
SFO104    9232.4611250 MHz
SFO105    9469.9757300 MHz
SFO106    9715.5013350 MHz
SFO107    9970.0589400 MHz
SFO108   10223.6285450 MHz
SFO109   10496.2241500 MHz
SFO110   10777.8847550 MHz
SFO111   11073.6423600 MHz
SFO112   11365.6129650 MHz
SFO113   11662.7055700 MHz
SFO114   11958.9311750 MHz
SFO115   12254.4267800 MHz
SFO116   12554.1593850 MHz
SFO117   12852.0939900 MHz
SFO118   13158.3055950 MHz
SFO119   13469.7432000 MHz
SFO120   13789.3768050 MHz
SFO121   14113.1954100 MHz
SFO122   14459.4270150 MHz
SFO123   14808.4466200 MHz
SFO124   15211.2552250 MHz
SFO125   15616.8928300 MHz
SFO126   16035.0684350 MHz
SFO127   16466.0740400 MHz
SFO128   16904.2896450 MHz
SFO129   17390.7472500 MHz
SFO130   17874.5728550 MHz
SFO131   18366.6860600 MHz
SFO132   18866.1268650 MHz
SFO133   19373.9130700 MHz
SFO134   19888.9456750 MHz
SFO135   20412.9740800 MHz
SFO136   20955.2932850 MHz
SFO137   21489.8480900 MHz
SFO138   22078.5683000 MHz
SFO139   22669.4539050 MHz
SFO140   23277.4501100 MHz
SFO141   23894.4379150 MHz
SFO142   24529.5293200 MHz
SFO143   25193.7331250 MHz
SFO144   25866.1323300 MHz
SFO145   26556.7365350 MHz
SFO146   27274.4443400 MHz
SFO147   27991.2669450 MHz
SFO148   28727.2091500 MHz
SFO149   29494.0019550 MHz
SFO150   30284.7337600 MHz
SFO151   31103.4583650 MHz
SFO152   31941.1849700 MHz
SFO153   32817.9727750 MHz
SFO154   33719.1901800 MHz
SFO155   34629.0783850 MHz
SFO156   35577.1931900 MHz
SFO157   36482.2936000 MHz
SFO158   37453.5214050 MHz
SFO159   38441.7678100 MHz
SFO160   39448.4080150 MHz
SFO161   40483.2152200 MHz
SFO162   41547.1788250 MHz
SFO163   42629.2700300 MHz
SFO164   43743.4018350 MHz
SFO165   44875.5950400 MHz
SFO166   46045.9612450 MHz
SFO167   47277.5986500 MHz
SFO168   48549.2404550 MHz
SFO169   49840.7812600 MHz
SFO170   51171.4808650 MHz
SFO171   52541.3484700 MHz
SFO172   53950.6840750 MHz
SFO173   55398.7076800 MHz
SFO174   56895.5092850 MHz
SFO175   58441.1088900 MHz
SFO176   59977.5165000 MHz
SFO177   61513.8321050 MHz
SFO178   63131.8627100 MHz
SFO179   64776.1009150 MHz
SFO180   66456.5421200 MHz
SFO181   68173.1727250 MHz
SFO182   69916.0365300 MHz
SFO183   71695.1927350 MHz
SFO184   73510.5603400 MHz
SFO185   75362.3505450 MHz
SFO186   77251.4101500 MHz
SFO187   79188.4217550 MHz
SFO188   81162.5043600 MHz
SFO189   83183.6801650 MHz
SFO190   85221.9471700 MHz
SFO191   87298.3069750 MHz
SFO192   89399.3747800 MHz
SFO193   91496.7505850 MHz
SFO194   93630.5721900 MHz
SFO195   95799.7228000 MHz
SFO196   97904.8704050 MHz
SFO197   100046.1040100 MHz
SFO198   102223.5226150 MHz
SFO199   104436.7652200 MHz
SFO200   106680.5368250 MHz
SFO201   108967.8424300 MHz
SFO202   111296.6200350 MHz
SFO203   113743.9106400 MHz
SFO204   116229.7142450 MHz
SFO205   118754.6338500 MHz
SFO206   121299.3774550 MHz
SFO207   123903.8800600 MHz
SFO208   126548.1312650 MHz
SFO209   129233.1380700 MHz
SFO210   131958.3978750 MHz
SFO211   134713.7204800 MHz
SFO212   137514.1070850 MHz
SFO213   140360.5346900 MHz
SFO214   143252.9192950 MHz
SFO215   146192.3549000 MHz
SFO216   149180.7425050 MHz
SFO217   152217.1731100 MHz
SFO218   155302.6357150 MHz
SFO219   158437.1393200 MHz
SFO220   161621.7089250 MHz
SFO221   164995.2815300 MHz
SFO222   168414.3581350 MHz
SFO223   171887.9257400 MHz
SFO224   175416.4953450 MHz
SFO225   178999.0629500 MHz
SFO226   182624.7405550 MHz
SFO227   186304.9691600 MHz
SFO228   190040.6487650 MHz
SFO229   193831.8793700 MHz
SFO230   197678.5319750 MHz
SFO231   201581.7265800 MHz
SFO232   205540.4641850 MHz
SFO233   209554.7437900 MHz
SFO234   213623.7583950 MHz
SFO235   217767.3690000 MHz
SFO236   221985.4856050 MHz
SFO237   226366.2292100 MHz
SFO238   230866.0908150 MHz
SFO239   235385.5584200 MHz
SFO240   240023.8840250 MHz
SFO241   244741.0876300 MHz
SFO242   249516.2992350 MHz
SFO243   254407.5288400 MHz
SFO244   259425.9864450 MHz
SFO245   264463.1630500 MHz
SFO246   269544.9666550 MHz
SFO247   274752.1502600 MHz
SFO248   280086.7444650 MHz
SFO249   285663.1236700 MHz
SFO250   291384.1032750 MHz
SFO251   297211.5484800 MHz
SFO252   303169.0692850 MHz
SFO253   309150.6568900 MHz
SFO254   315268.3714950 MHz
SFO255   321414.2871000 MHz
SFO256   327697.3147050 MHz
SFO257   334118.3603100 MHz
SFO258   340683.3989150 MHz
SFO259   347299.4935200 MHz
SFO260   354057.6291250 MHz
SFO261   360978.8757300 MHz
SFO262   367957.1483350 MHz
SFO263   375093.4399400 MHz
SFO264   382384.4525450 MHz
SFO265   389832.8291500 MHz
SFO266   397447.5677550 MHz
SFO267   405126.5093600 MHz
SFO268   412971.2789650 MHz
SFO269   420981.7665700 MHz
SFO270   429049.1531750 MHz
SFO271   437280.3647800 MHz
SFO272   445684.2933850 MHz
SFO273   454352.6519900 MHz
SFO274   463195.4291950 MHz
SFO275   472331.6348000 MHz
SFO276   481082.2784050 MHz
SFO277   490048.5620100 MHz
SFO278   499334.4836150 MHz
SFO279   508840.9392200 MHz
SFO280   518558.8608250 MHz
SFO281   528498.2484300 MHz
SFO282   538676.0760350 MHz
SFO283   549083.2816400 MHz
SFO284   559819.8212450 MHz
SFO285   570786.7888500 MHz
SFO286   581985.0844550 MHz
SFO287   593422.7200600 MHz
SFO288   605199.7886650 MHz
SFO289   617217.4902700 MHz
SFO290   629585.2458750 MHz
SFO291   642202.2584800 MHz
SFO292   655069.3280850 MHz
SFO293   668286.4646900 MHz
SFO294   681963.6582950 MHz
SFO295   696000.9109000 MHz
SFO296   710390.2225050 MHz
SFO297   725136.5941100 MHz
SFO298   740342.0857150 MHz
SFO299   755807.7963200 MHz
SFO300   771733.6269250 MHz
SFO301   788024.5775300 MHz
SFO302   804680.5491350 MHz
SFO303   821601.6407400 MHz
SFO304   838887.7523450 MHz
SFO305   856438.9769500 MHz
SFO306   874365.3345550 MHz
SFO307   892661.7651600 MHz
SFO308   911328.2487650 MHz
SFO309   930165.7853700 MHz
SFO310   949273.3459750 MHz
SFO311   968651.9475800 MHz
SFO312   988400.6051850 MHz
SFO313   1008519.3187900 MHz
SFO314   1028907.0953950 MHz
SFO315   1049573.8880000 MHz
SFO316   1070519.6956050 MHz
SFO317   1091845.5292100 MHz
SFO318   1113462.3028150 MHz
SFO319   1136364.8964200 MHz
SFO320   1159652.3180250 MHz
SFO321   1183325.6646300 MHz
SFO322   1207379.7722350 MHz
SFO323   1231442.7240400 MHz
SFO324   1255851.6336450 MHz
SFO325   1280693.4012500 MHz
SFO326   1305875.1278550 MHz
SFO327   1331398.4184600 MHz
SFO328   1357263.4770650 MHz
SFO329   1383479.1926700 MHz
SFO330   1409935.5742750 MHz
SFO331   1436742.6238800 MHz
SFO332   1463891.3354850 MHz
SFO333   1491380.7090900 MHz
SFO334   1519219.7556950 MHz
SFO335   1547409.2833000 MHz
SFO336   1575728.3849050 MHz
SFO337   1604337.0185100 MHz
SFO338   1633054.6571150 MHz
SFO339   1662071.2687200 MHz
SFO340   1691388.0183250 MHz
SFO341   1720904.8179300 MHz
SFO342   1750621.5665350 MHz
SFO343   1780548.3151400 MHz
SFO344   1810674.2617450 MHz
SFO345   1840901.2053500 MHz
SFO346   1871328.1469550 MHz
SFO347   1901955.0745600 MHz
SFO348   1932782.9461650 MHz
SFO349   1963804.8607700 MHz
SFO350   1995022.7183750 MHz
SFO351   2026444.6199800 MHz
SFO352   2059167.3815850 MHz
SFO353   2092091.1471900 MHz
SFO354   2125314.9097950 MHz
SFO355   2157717.1894000 MHz
SFO356   2193284.1370050 MHz
SFO357   2229011.0626100 MHz
SFO358   2265000.7822150 MHz
SFO359   2301152.2998200 MHz
SFO360   2337457.0554250 MHz
SFO361   2374025.3630300 MHz
SFO362   2410757.1156350 MHz
SFO363   2448648.0282400 MHz
SFO364   2486840.1048450 MHz
SFO365   2525123.2724500 MHz
SFO366   2562591.5840550 MHz
SFO367   2600441.9822600 MHz
SFO368   2638491.1198650 MHz
SFO369   2676171.7880700 MHz
SFO370   2714582.2722750 MHz
SFO371   2752873.4448800 MHz
SFO372   2791344.2950850 MHz
SFO373   2830085.8768900 MHz
SFO374   2868008.8277000 MHz
SFO375   2906213.2984050 MHz
SFO376   2944539.1990100 MHz
SFO377   2983055.6086150 MHz
SFO378   3021767.4672200 MHz
SFO379   3060686.7948250 MHz
SFO380   3098998.1894300 MHz
SFO381   3136918.6090350 MHz
SFO382   3174340.0226400 MHz
SFO383   3210951.8652450 MHz
SFO384   3247755.0538500 MHz
SFO385   3284870.8700550 MHz
SFO386   3321984.6482600 MHz
SFO387   3358319.1324650 MHz
SFO388   3394967.3140700 MHz
SFO389   3431724.2832750 MHz
SFO390   3468891.9150800 MHz
SFO391   3506624.0288850 MHz
SFO392   3543642.6570900 MHz
SFO393   3580849.2787000 MHz
SFO394   3618251.9553050 MHz
SFO395   3654153.2715100 MHz
SFO396   3689259.5887150 MHz
SFO397   3724569.8515200 MHz
SFO398   3760185.5847250 MHz
SFO399   3795911.3045300 MHz
SFO400   3831837.5141350 MHz
SFO401   3867944.2203400 MHz
SFO402   3904251.5125450 MHz
SFO403   3940860.7937500 MHz
SFO404   3977668.1589550 MHz
SFO405   4014684.5191600 MHz
SFO406   4051802.7043650 MHz
SFO407   4089037.1795700 MHz
SFO408   4126389.6649750 MHz
SFO409   4162131.1207800 MHz
SFO410   4198131.0523850 MHz
SFO411   4234081.3861900 MHz
SFO412   4270231.6284000 MHz
SFO413   4306581.7362050 MHz
SFO414   4343331.5698100 MHz
SFO415   4380331.1834150 MHz
SFO416   4417580.3670200 MHz
SFO417   4454079.4246250 MHz
SFO418   4490928.7512300 MHz
SFO419   4528127.2688350 MHz
SFO420   4564575.9164400 MHz
SFO421   4601323.7080450 MHz
SFO422   4638371.7396500 MHz
SFO423   4675668.3632550 MHz
SFO424   4713314.5808600 MHz
SFO425   4750362.5484650 MHz
SFO426   4787706.5640700 MHz
SFO427   4825453.5526750 MHz
SFO428   4862493.5482800 MHz
SFO429   4900933.5540850 MHz
SFO430   4938723.5716900 MHz
SFO431   4976863.6072950 MHz
SFO432   5015253.6649000 MHz
SFO433   5053993.7267050 MHz
SFO434   5091983.7633100 MHz
SFO435   5130323.7839150 MHz
SFO436   5168463.7695200 MHz
SFO437   5206303.7541250 MHz
SFO438   5244143.6987300 MHz
SFO439   5282243.5963350 MHz
SFO440   5320393.4529400 MHz
SFO441   5358643.2245450 MHz
SFO442   5397092.9151500 MHz
SFO443   5435742.4287550 MHz
SFO444   5474492.0613600 MHz
SFO445   5512841.7329650 MHz
SFO446   5551091.4085700 MHz
SFO447   5589041.0781750 MHz
SFO448   5626790.7807800 MHz
SFO449   5664640.5253850 MHz
SFO450   5702690.2439900 MHz
SFO451   5740839.7255950 MHz
SFO452   5779089.2262000 MHz
SFO453   5817438.7298050 MHz
SFO454   5855988.2534100 MHz
SFO455   5894637.7940150 MHz
SFO456   5933387.3856200 MHz
SFO457   5972236.9942250 MHz
SFO458   6011286.6218300 MHz
SFO459   6050435.2764350 MHz
SFO460   6088683.9220400 MHz
SFO461   6127132.6406450 MHz
SFO462   6164879.8182500 MHz
SFO463   6202724.8458550 MHz
SFO464   6240810.9604600 MHz
SFO465   6279087.1780650 MHz
SFO466   6317473.2906700 MHz
SFO467   6355924.6282750 MHz
SFO468   6394526.0938800 MHz
SFO469   6433288.4854850 MHz
SFO470   6471350.8460900 MHz
SFO471   6509613.7032950 MHz
SFO472   6548076.4759000 MHz
SFO473   6586739.1685050 MHz
SFO474   6624610.8771100 MHz
SFO475   6662702.6287150 MHz
SFO476   6700964.4413200 MHz
SFO477   6739426.0189250 MHz
SFO478   6778087.5985300 MHz
SFO479   6816861.2371350 MHz
SFO480   6855846.8537400 MHz
SFO481   6895042.5373450 MHz
SFO482   6934448.3199500 MHz
SFO483   6974064.1895550 MHz
SFO484   7013890.1481600 MHz
SFO485   7053927.0147650 MHz
SFO486   7094178.8193700 MHz
SFO487   7134645.5939750 MHz
SFO488   7175428.3875800 MHz
SFO489   7216428.2651850 MHz
SFO490   7257617.1447900 MHz
SFO491   7299011.9114000 MHz
SFO492   7340611.5760050 MHz
SFO493   7382415.1706100 MHz
SFO494   7424427.7582150 MHz
SFO495   7466547.3698200 MHz
SFO496   7508872.3954250 MHz
SFO497   7551401.9600300 MHz
SFO498   7594126.5526350 MHz
SFO499   7637056.1732400 MHz
SFO500   7680290.8138450 MHz
SFO501   7723729.4834500 MHz
SFO502   7767462.1720550 MHz
SFO503   7811362.8386600 MHz
SFO504   7855510.5722650 MHz
SFO505   7900016.2854700 MHz
SFO506   7944779.0572750 MHz
SFO507   7989808.8640800 MHz
SFO508   8035102.6028850 MHz
SFO509   8080631.2756900 MHz
SFO510   8126364.8675000 MHz
SFO511   8172302.5643050 MHz
SFO512   8218545.7839100 MHz
SFO513   8265080.8265150 MHz
SFO514   8311879.9041200 MHz
SFO515   8358932.0017250 MHz
SFO516   8406247.1773300 MHz
SFO517   8453824.4349350 MHz
SFO518   8501574.7875400 MHz
SFO519   8549465.1361450 MHz
SFO520   8597515.5307500 MHz
SFO521   8645726.8603550 MHz
SFO522   8694099.1669600 MHz
SFO523   8742632.4105650 MHz
SFO524   8791333.5741700 MHz
SFO525   8840190.5507750 MHz
SFO526   8889213.4093800 MHz
SFO527   8938402.1129850 MHz
SFO528   8987686.5905900 MHz
SFO529   9037135.1491950 MHz
SFO530   9086758.2428000 MHz
SFO531   91364
```

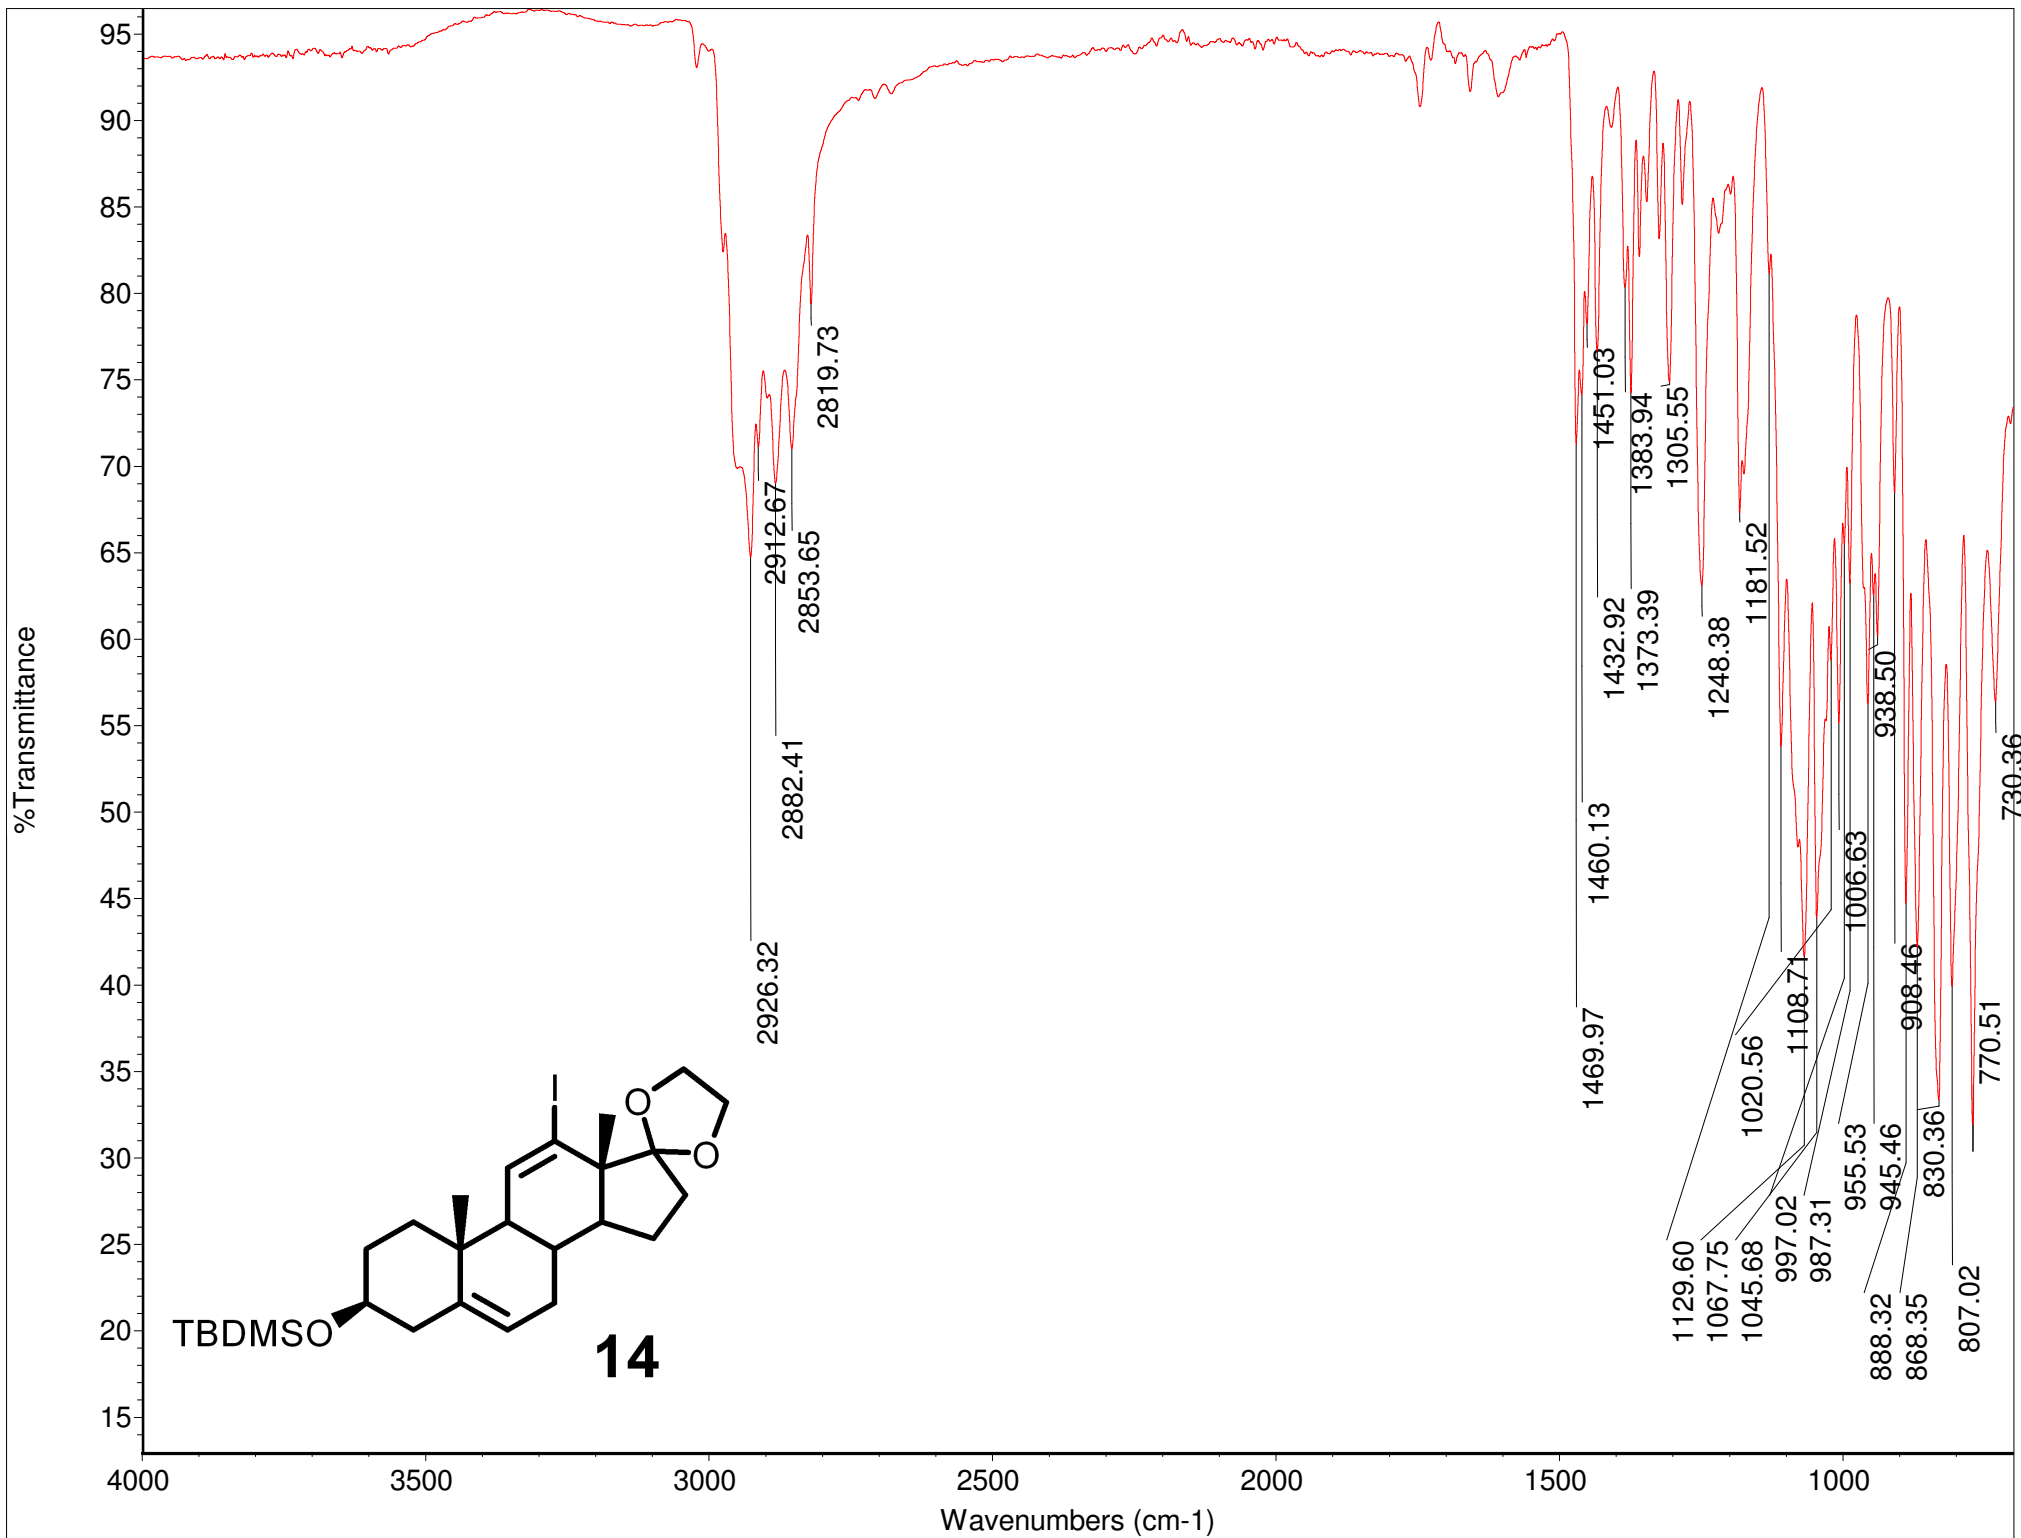

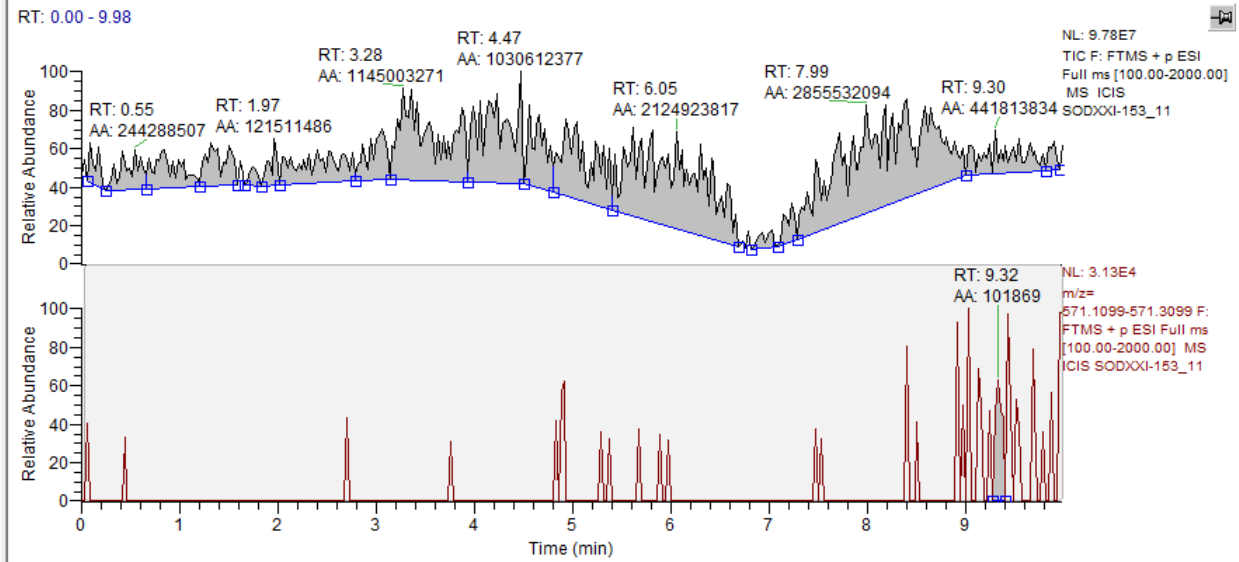

SODXXI-153\_11 #71-368 RT: 1.89-9.98 AV: 298 NL: 1.30E3  
 F: FTMS + p ESI Full ms [100.00-2000.00]

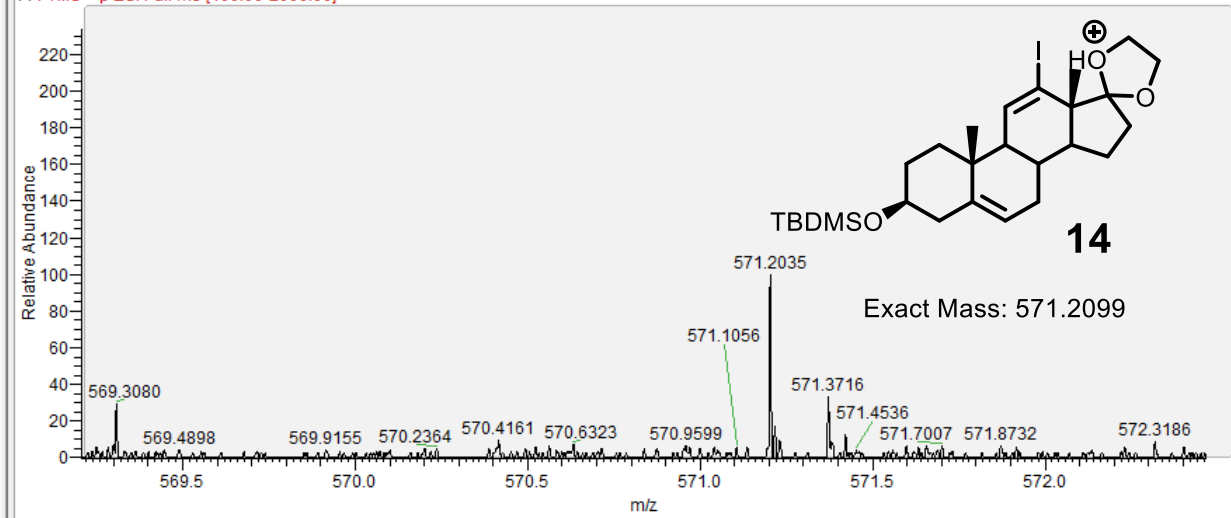

Original O.R. : -0.024°      O.R. °     

-0.024

Temp. : 21.6°C ↓ 21.6°C

| WLG                  | Cell     | ATC  |
|----------------------|----------|------|
| 589.41               | 1.0000ds | 20.0 |
| Mode                 | Times    | GLP  |
| single               | 1        | off  |
| Name:      Database: |          | SAVE |

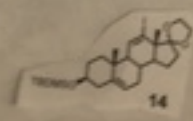

4.1mg  
-----  
10 mL  
CCl<sub>4</sub>      -0.024

Current Data Parameters  
 NAME SODXX\_009\_R875\_VI\_IODIDE\_FULL\_CLEAN\_05\_12\_2021  
 EXPNO 1  
 PROCNO 1  
 F2 - Acquisition Parameters  
 Date\_ Time 20220511 14:03:14  
 INSTRUM spect  
 PROBHD 2143298\_003 (1H/13C) (1.5mm QNP 1H/13C) (1.5mm) (1.5mm) (1.5mm)  
 PULPROG zgpg30  
 TD 32768  
 SOLVENT CDCl3  
 NS 8  
 DS 0  
 SWH 10000.000 Hz  
 FIDRES 0.610352 Hz  
 AQ 1.6384000 sec  
 RG 185.92  
 DW 50.000 usec  
 DE 6.50 usec  
 TE 298.2 K  
 D1 1.00000000 sec  
 TDO 1  
 SFO1 500.1330883 MHz  
 NUC1 1H  
 FO 3.03 usec  
 P1 11.50 usec  
 PLW1 9.90830040 W  
 F2 - Processing parameters  
 SI 65536  
 SF 500.1300120 MHz  
 WDW EM  
 SSB 0  
 LB 0.30 Hz  
 GB 0  
 PC 1.00

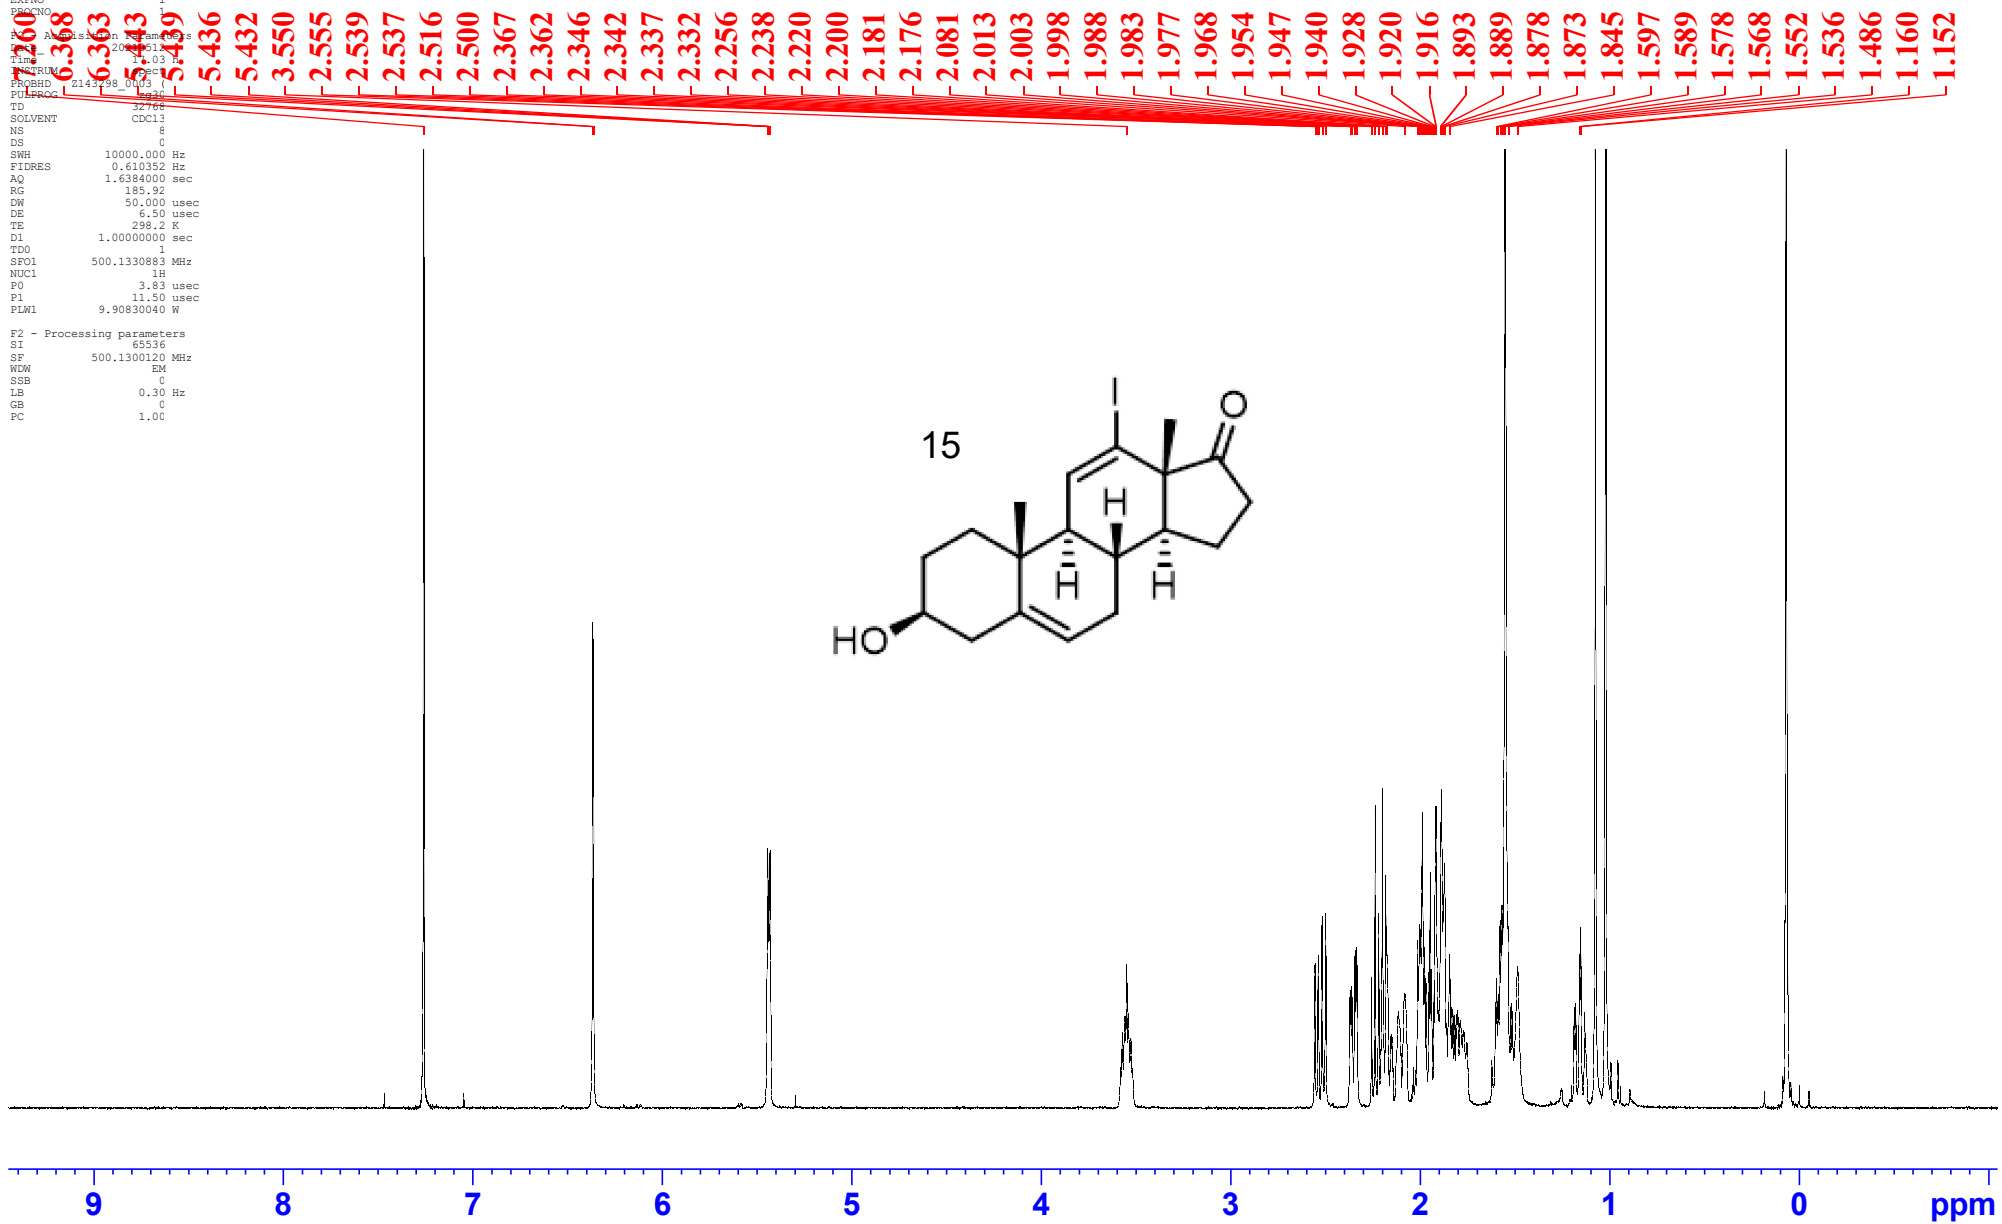

7.200  
6.363  
5.432  
5.436  
3.550  
2.555  
2.539  
2.537  
2.516  
2.500  
2.367  
2.362  
2.346  
2.342  
2.337  
2.332  
2.256  
2.238  
2.220  
2.200  
2.181  
2.176  
2.081  
2.013  
2.003  
1.998  
1.988  
1.983  
1.977  
1.968  
1.954  
1.947  
1.940  
1.928  
1.920  
1.916  
1.893  
1.889  
1.878  
1.873  
1.845  
1.597  
1.589  
1.578  
1.568  
1.552  
1.536  
1.486  
1.160  
1.152

0.99  
1.00  
1.00  
1.03  
1.04  
3.16  
7.32  
6.03  
1.09  
3.04  
3.10

212.15

141.62  
139.86

121.21

100.84

71.72

58.12  
51.51  
50.40  
42.17  
37.79  
37.02  
36.67  
31.40  
30.36  
29.82  
19.78  
17.68

1.16

Current Data Parameters  
NAME SODXX\_009\_R8T5\_VI\_IODIDE\_FULL\_CLEAN\_05\_12\_2021  
EXPNO 1  
PROCNO 1

F2 - Acquisition Parameters  
Data 20210512  
Time 19.46 h  
INSTRUM spect  
PROBHD Z143298\_0003 ( )  
PULPROG udef  
TD 21424  
SOLVENT CDCl3  
NS 2048  
DS 0  
SWH 29761.904 Hz  
FIDRES 2.778370 Hz  
AQ 0.3599232 sec  
RG 189.92  
DW 16.800 usec  
DE 8.31 usec  
TE 298.1 K  
D1 4.0000000 sec  
D12 0.0002000 sec  
D20 20.0000000 sec  
TDO 1  
SFO1 125.7703643 MHz  
NUC1 13C  
P1 18.25 usec  
P13 2000.00 usec  
P26 500.00 usec  
PLW1 115.08000183 W  
SPNAM[5] Crp60comp.4  
SPOALS 0.500  
SPOFFS5 0 Hz  
SPW5 58.56200027 W  
SPNAM[8] Crp60,0.5,20.1  
SPOALS 0.500  
SPOFFS8 0 Hz  
SPW8 58.56200027 W  
SFO2 500.1320005 MHz  
NUC2 1H  
CPDPRG[2] waltr16  
PCPD2 80.00 usec  
PLW2 9.90830040 W  
PLW12 0.20475000 W

F2 - Processing parameters  
SI 131072  
SF 125.7577718 MHz  
WVW EM  
SSB 0  
LB 2.00 Hz  
GB 0  
FC 1.40

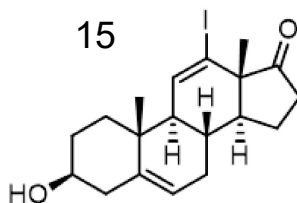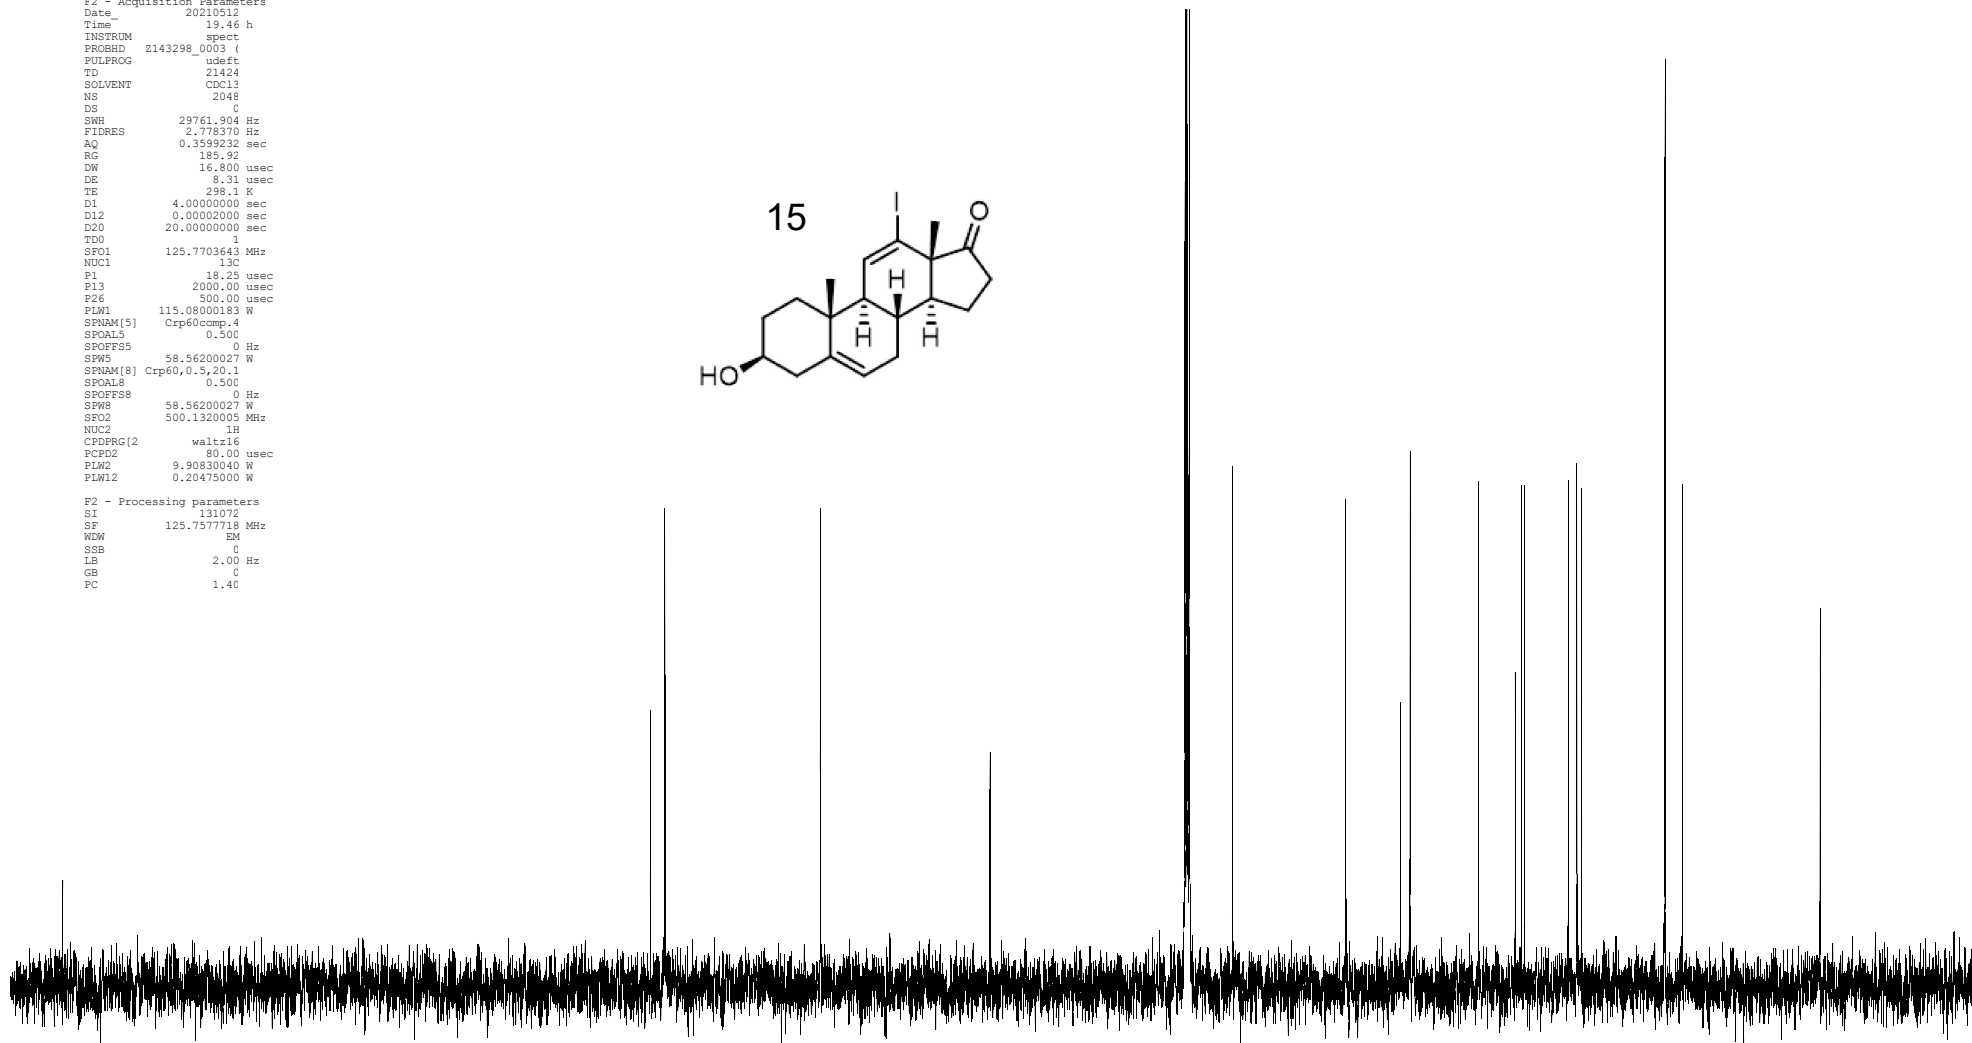

210 200 190 180 170 160 150 140 130 120 110 100 90 80 70 60 50 40 30 20 10 0 ppm



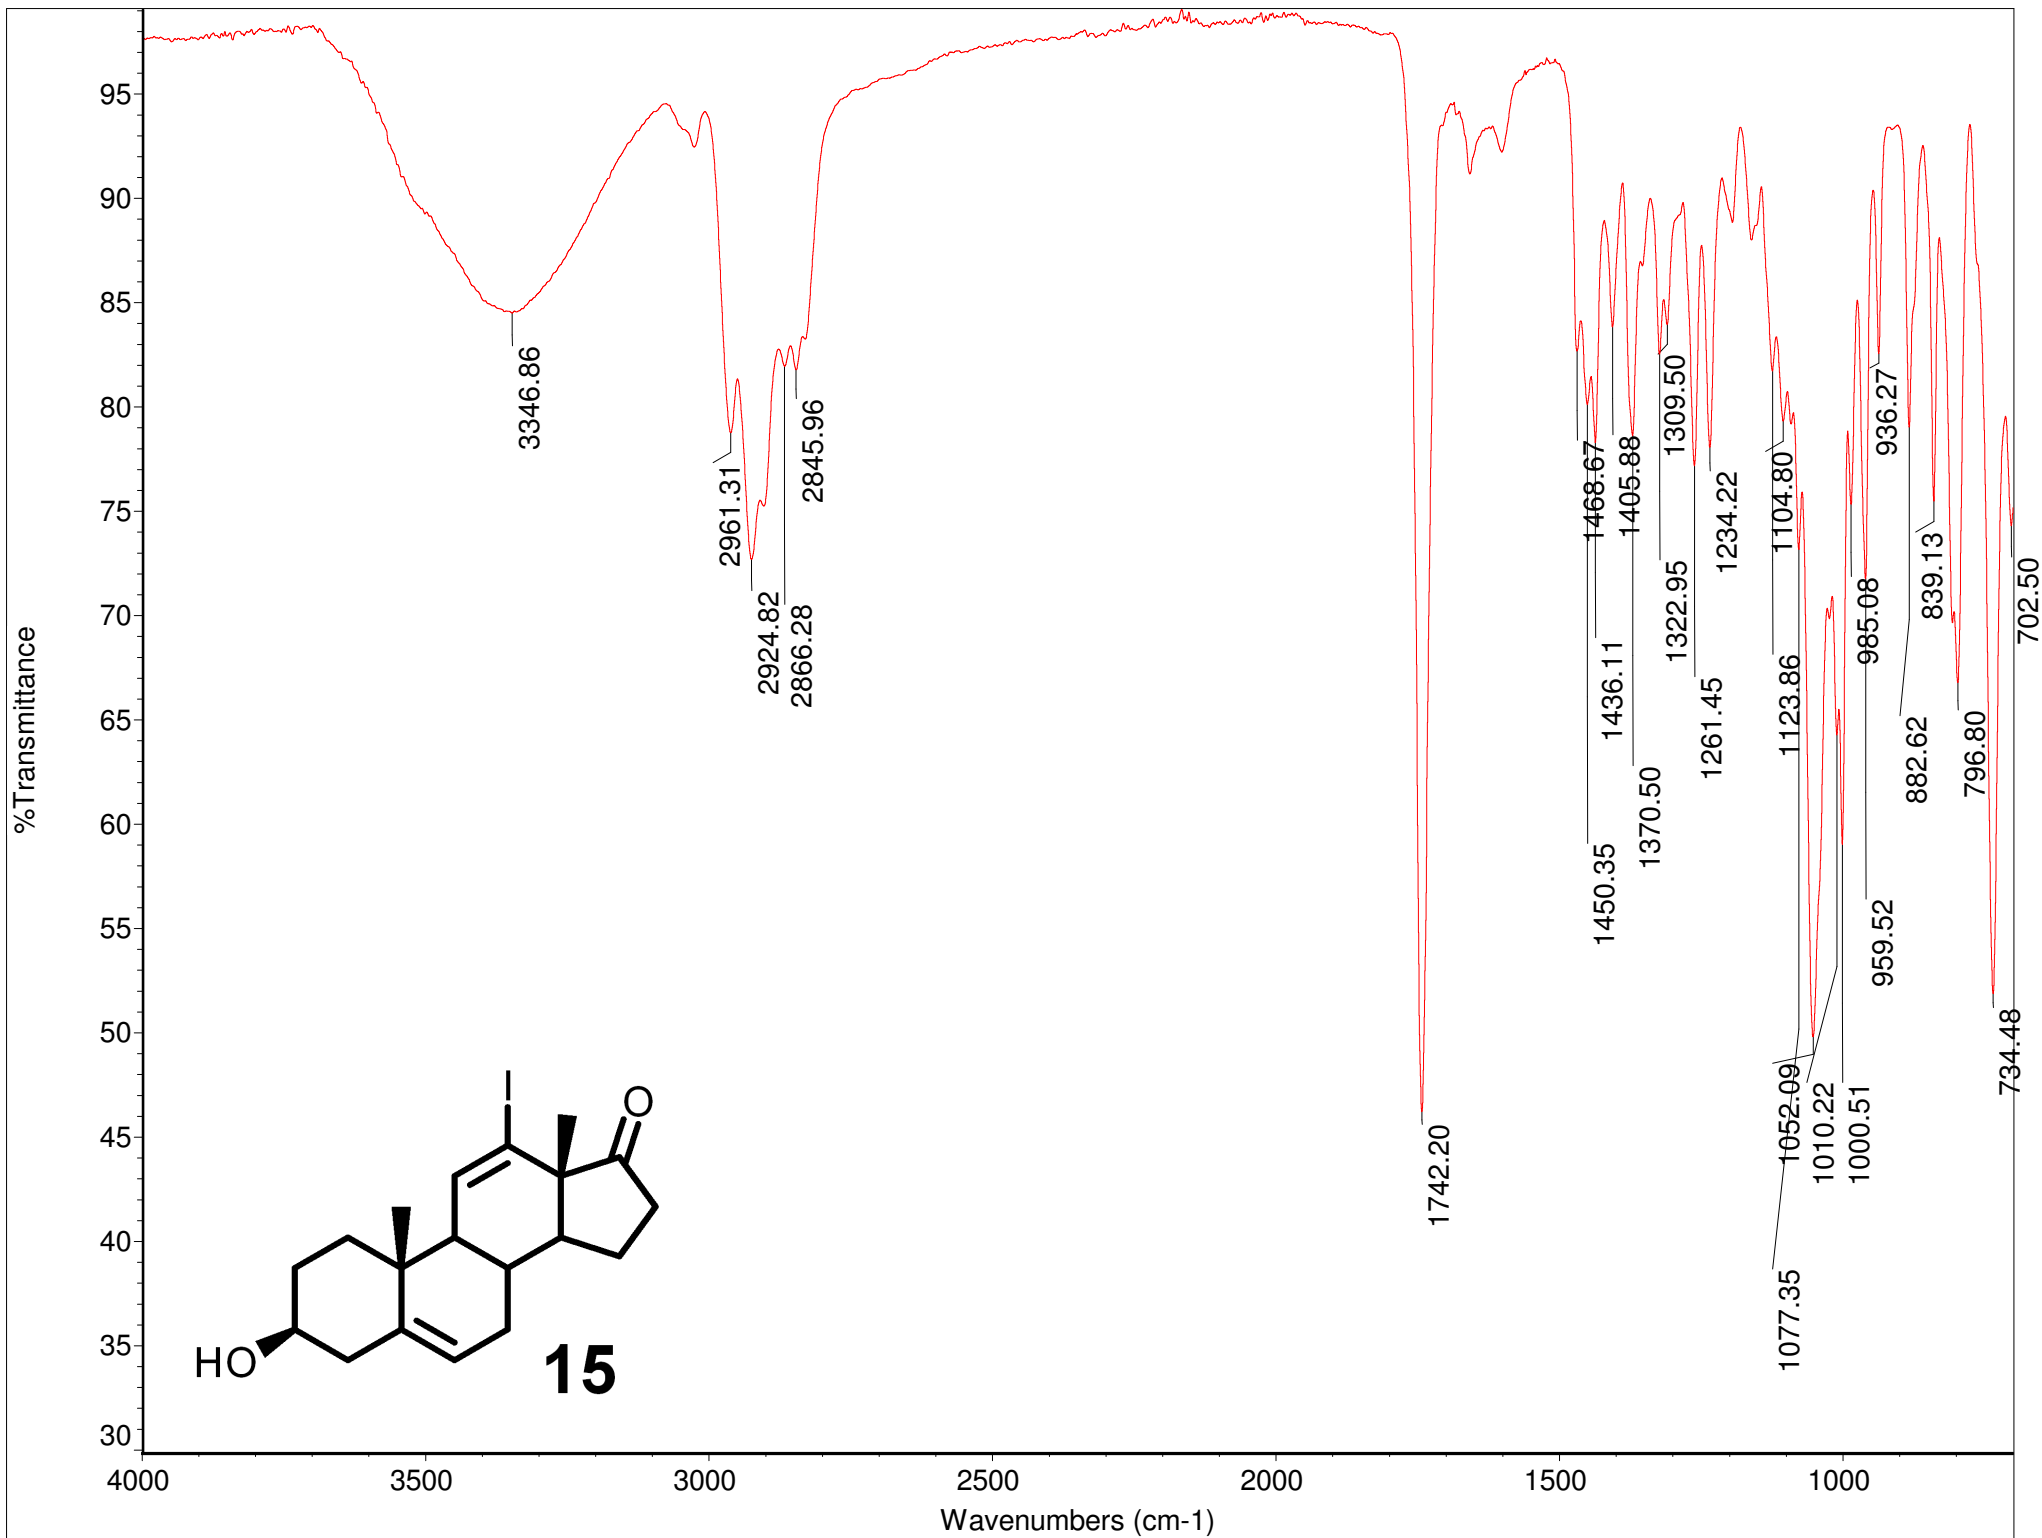

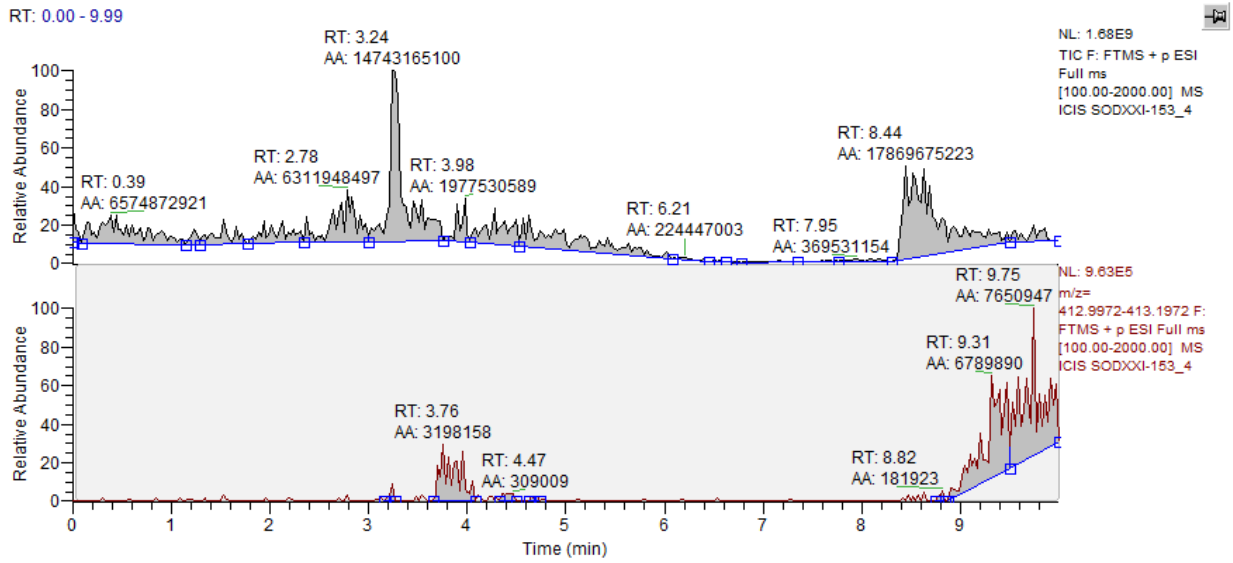

SODXXI-153\_4 #121-156 RT: 3.24-4.19 AV: 36 NL: 5.13E4

F: FTMS + p ESI Full ms [100.00-2000.00]

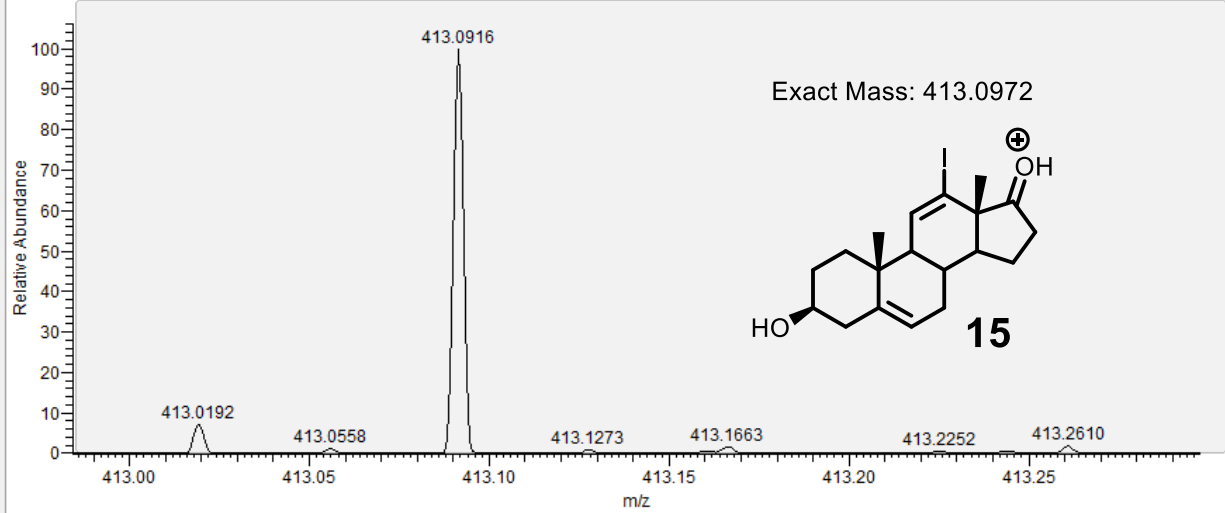

NUM

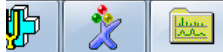

**LAXCO** Optical Rotation

Original O.R. : -0.081°      O.R. °     

**-0.081**

Temp. : 21.6°C ↓ 21.5°C

| W.C    | Cell     |     |  | ATC  |
|--------|----------|-----|--|------|
| 001.44 | 1.0000cm |     |  | 20.0 |
| Mode   | Times    | G.P |  |      |
| Single | 1        | 0.1 |  |      |

absor

2022-10-05 09:40:13

0.0 10-02 09:41 Zero

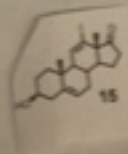

3.5mg  
 -----  
 10 mL  
 CHCl<sub>3</sub>

-0.081

Current Data Parameters  
 NAME SODXXI\_153\_PFR\_OAC\_COMPOUND\_1H\_13C\_10\_03\_2021  
 EXPNO 5  
 PROCNO 1  
 F2 - Acquisition Parameters  
 Date\_ 20211003  
 Time 18.30  
 P1 12.81  
 P2 0.00  
 P3 0.00  
 PROGNO 2140011004-6  
 TD 32768  
 SOLVENT CDCl3  
 NS 8  
 DS 0  
 SWH 10000.000 Hz  
 FIDRES 0.610352 Hz  
 AQ 1.6384000 sec  
 RG 52.93  
 DW 50.000 usec  
 DE 10.00 usec  
 TE 298.1 K  
 D1 1.00000000 sec  
 TD0 1  
 SFO1 500.1330883 MHz  
 NUC1 1H  
 P0 4.27 usec  
 P1 12.81 usec  
 PLW1 19.99900055 W  
 F2 - Processing parameters  
 SI 65536  
 SF 500.1300123 MHz  
 WDW EM  
 SSB 0  
 LB 0.30 Hz  
 GB 0  
 PC 1.00

8.498  
8.488  
8.485  
8.481  
8.450  
8.447  
8.445  
7.660  
7.656  
7.652  
7.644  
7.640  
7.636  
7.260  
7.234  
7.232  
7.224  
7.223  
7.218  
7.216  
7.208  
7.207  
5.571  
5.566  
5.531  
5.527  
5.523  
5.520  
4.641  
2.447  
2.431  
2.429  
2.204  
2.185  
2.165  
2.147  
2.056  
2.051  
2.042  
2.022  
1.999  
1.994  
1.988  
1.981  
1.974  
1.968  
1.961  
1.954  
1.659  
1.654  
1.272  
1.265  
1.077

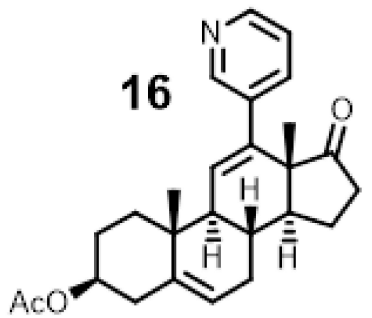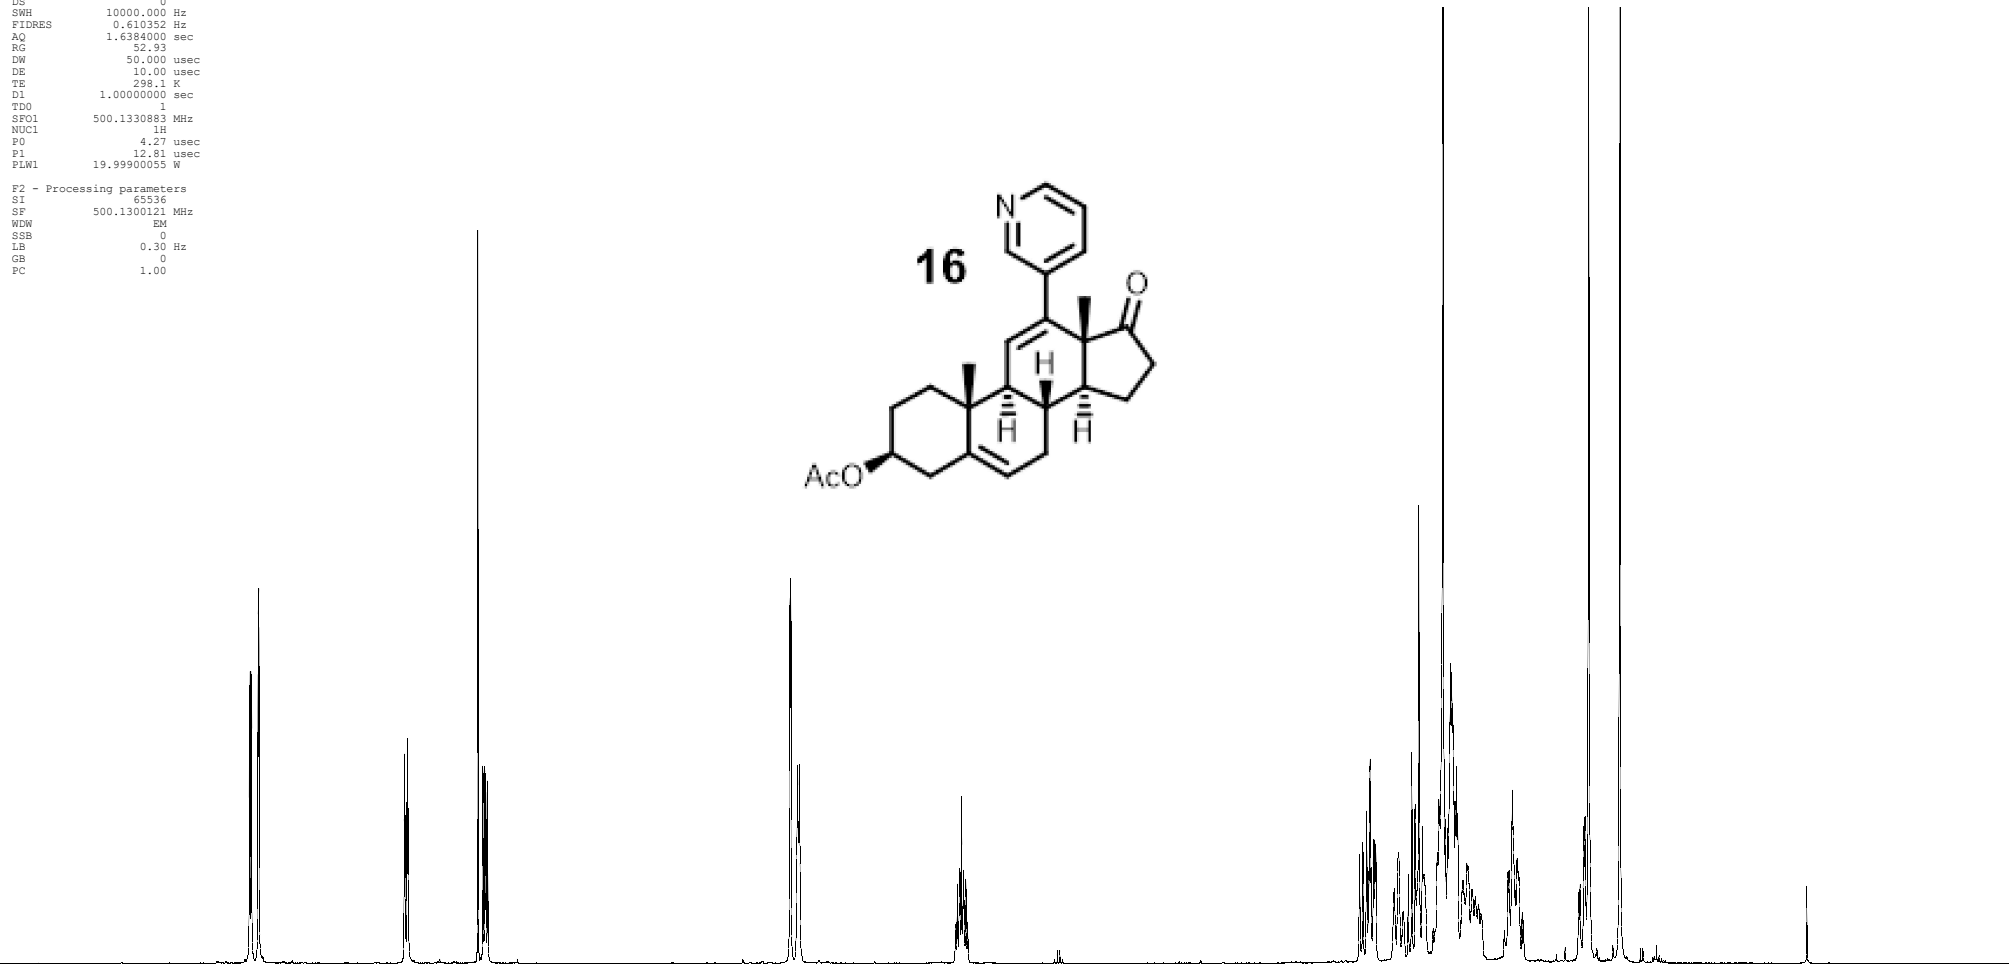

0.91  
0.96

0.99  
0.99

0.99  
1.01

1.00

2.11  
3.52  
1.27  
2.85  
3.66  
2.44  
2.14  
1.01  
3.18  
3.00

ppm

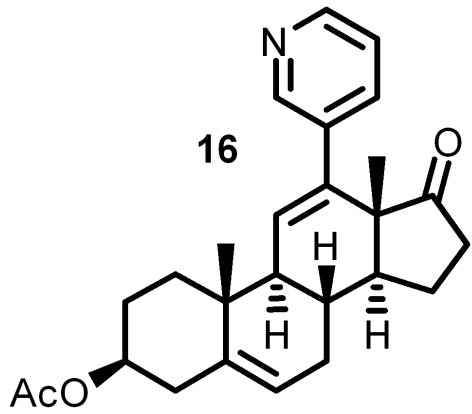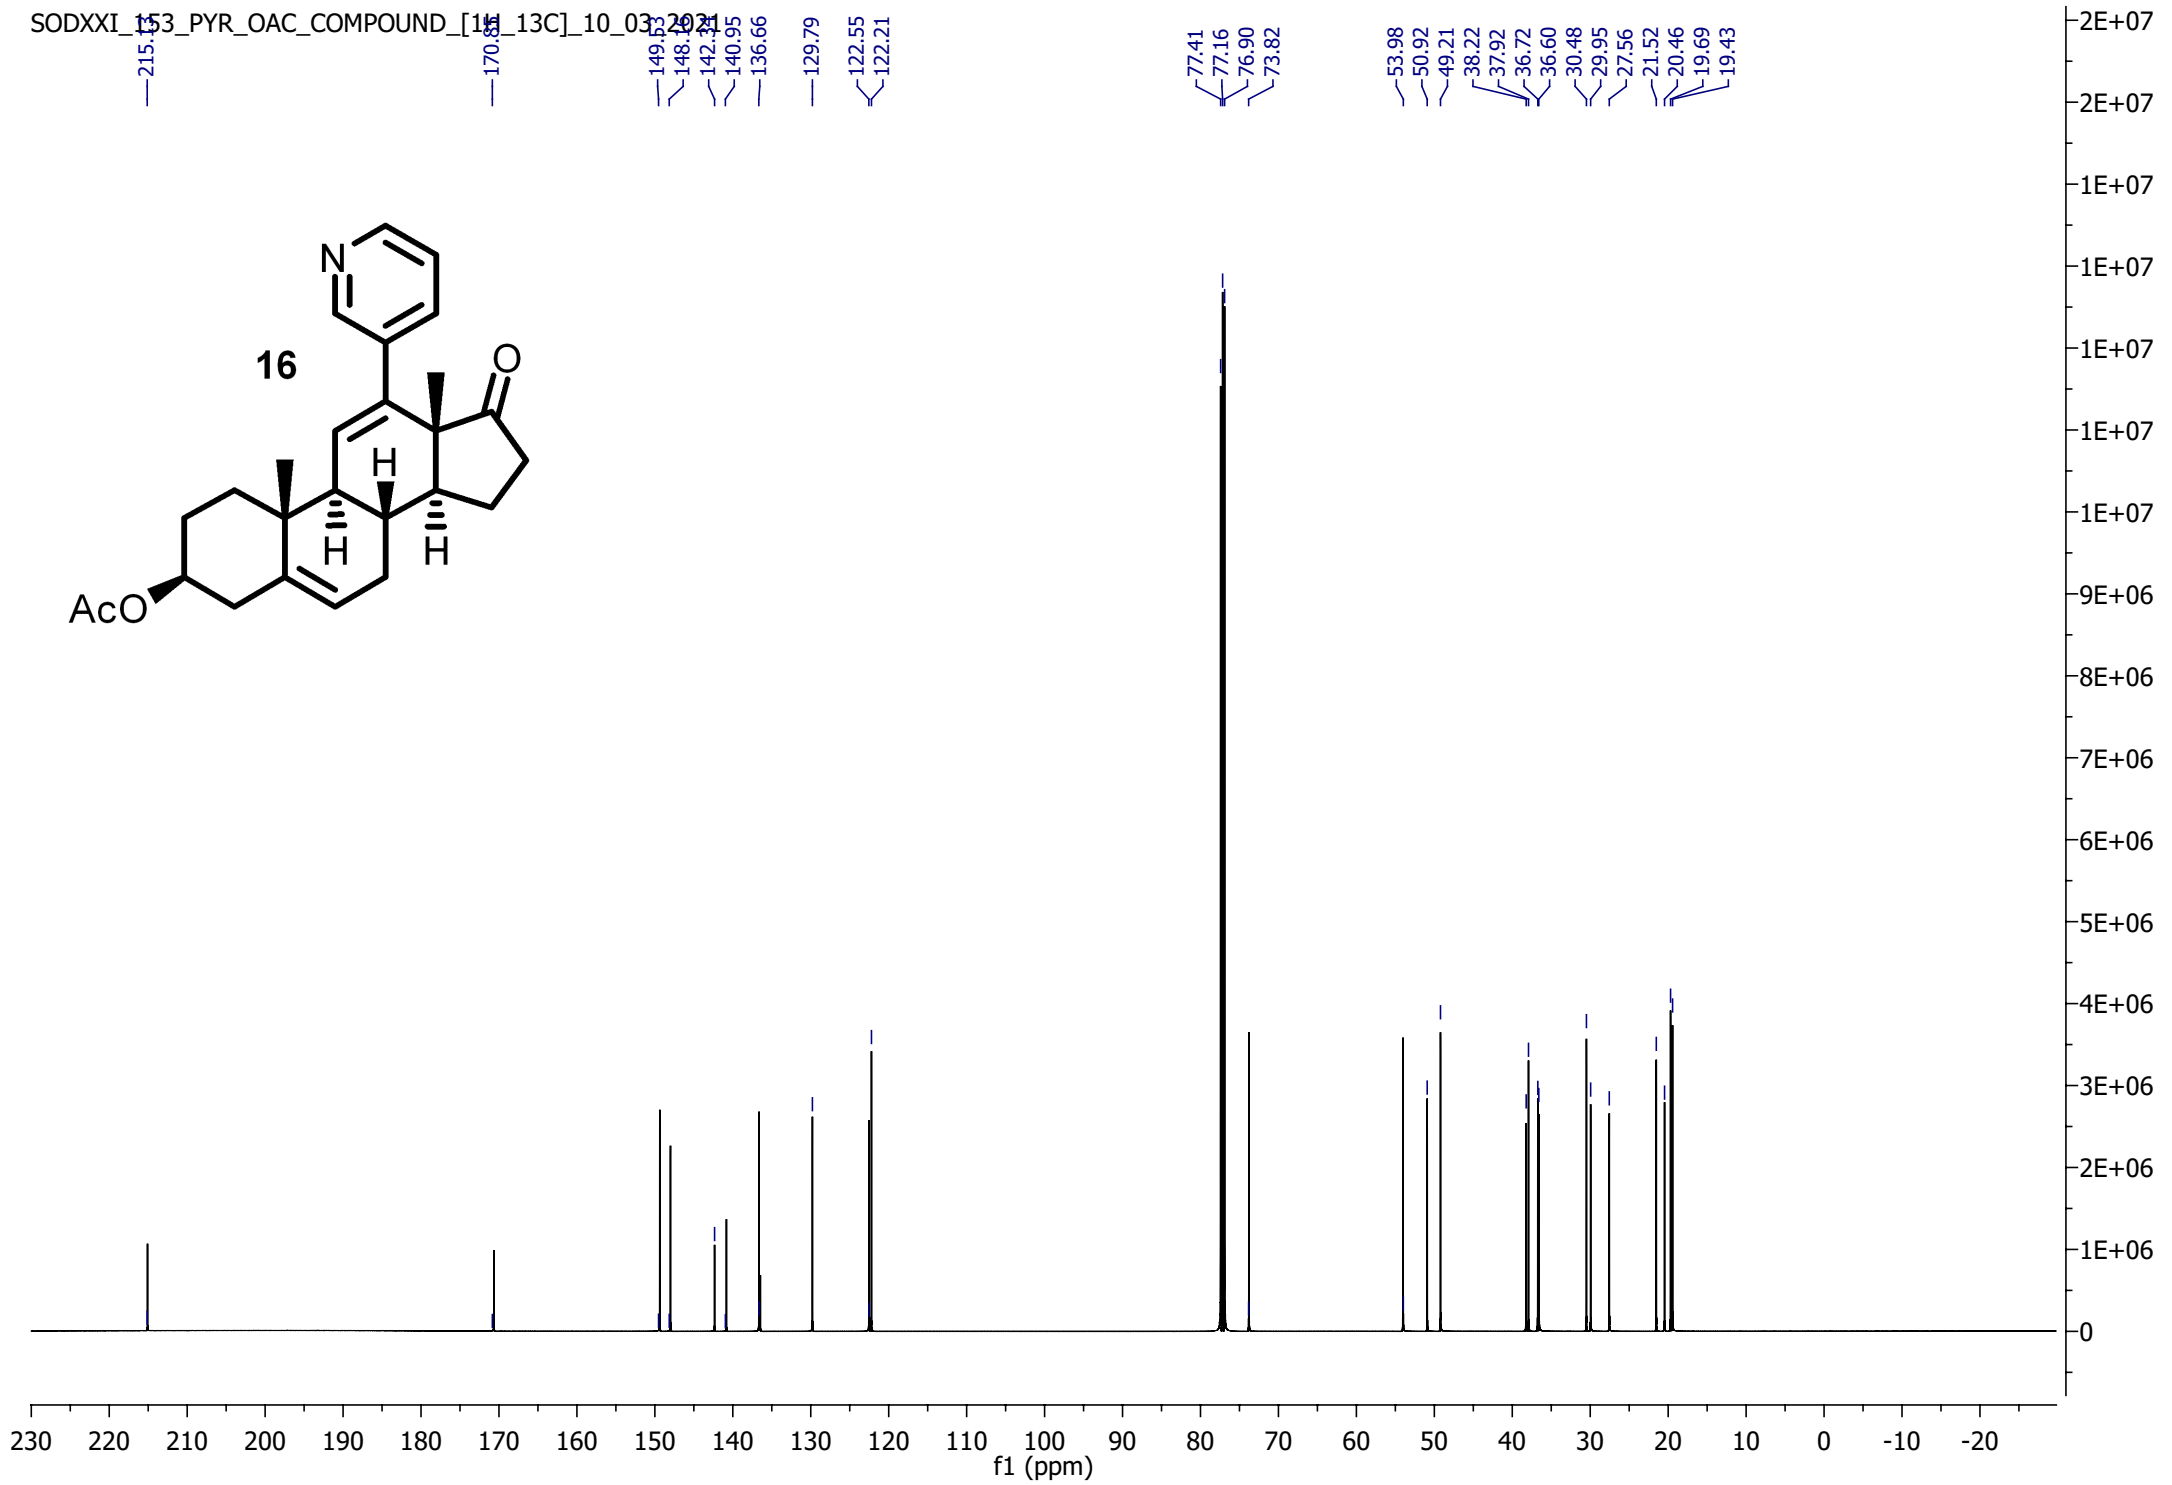

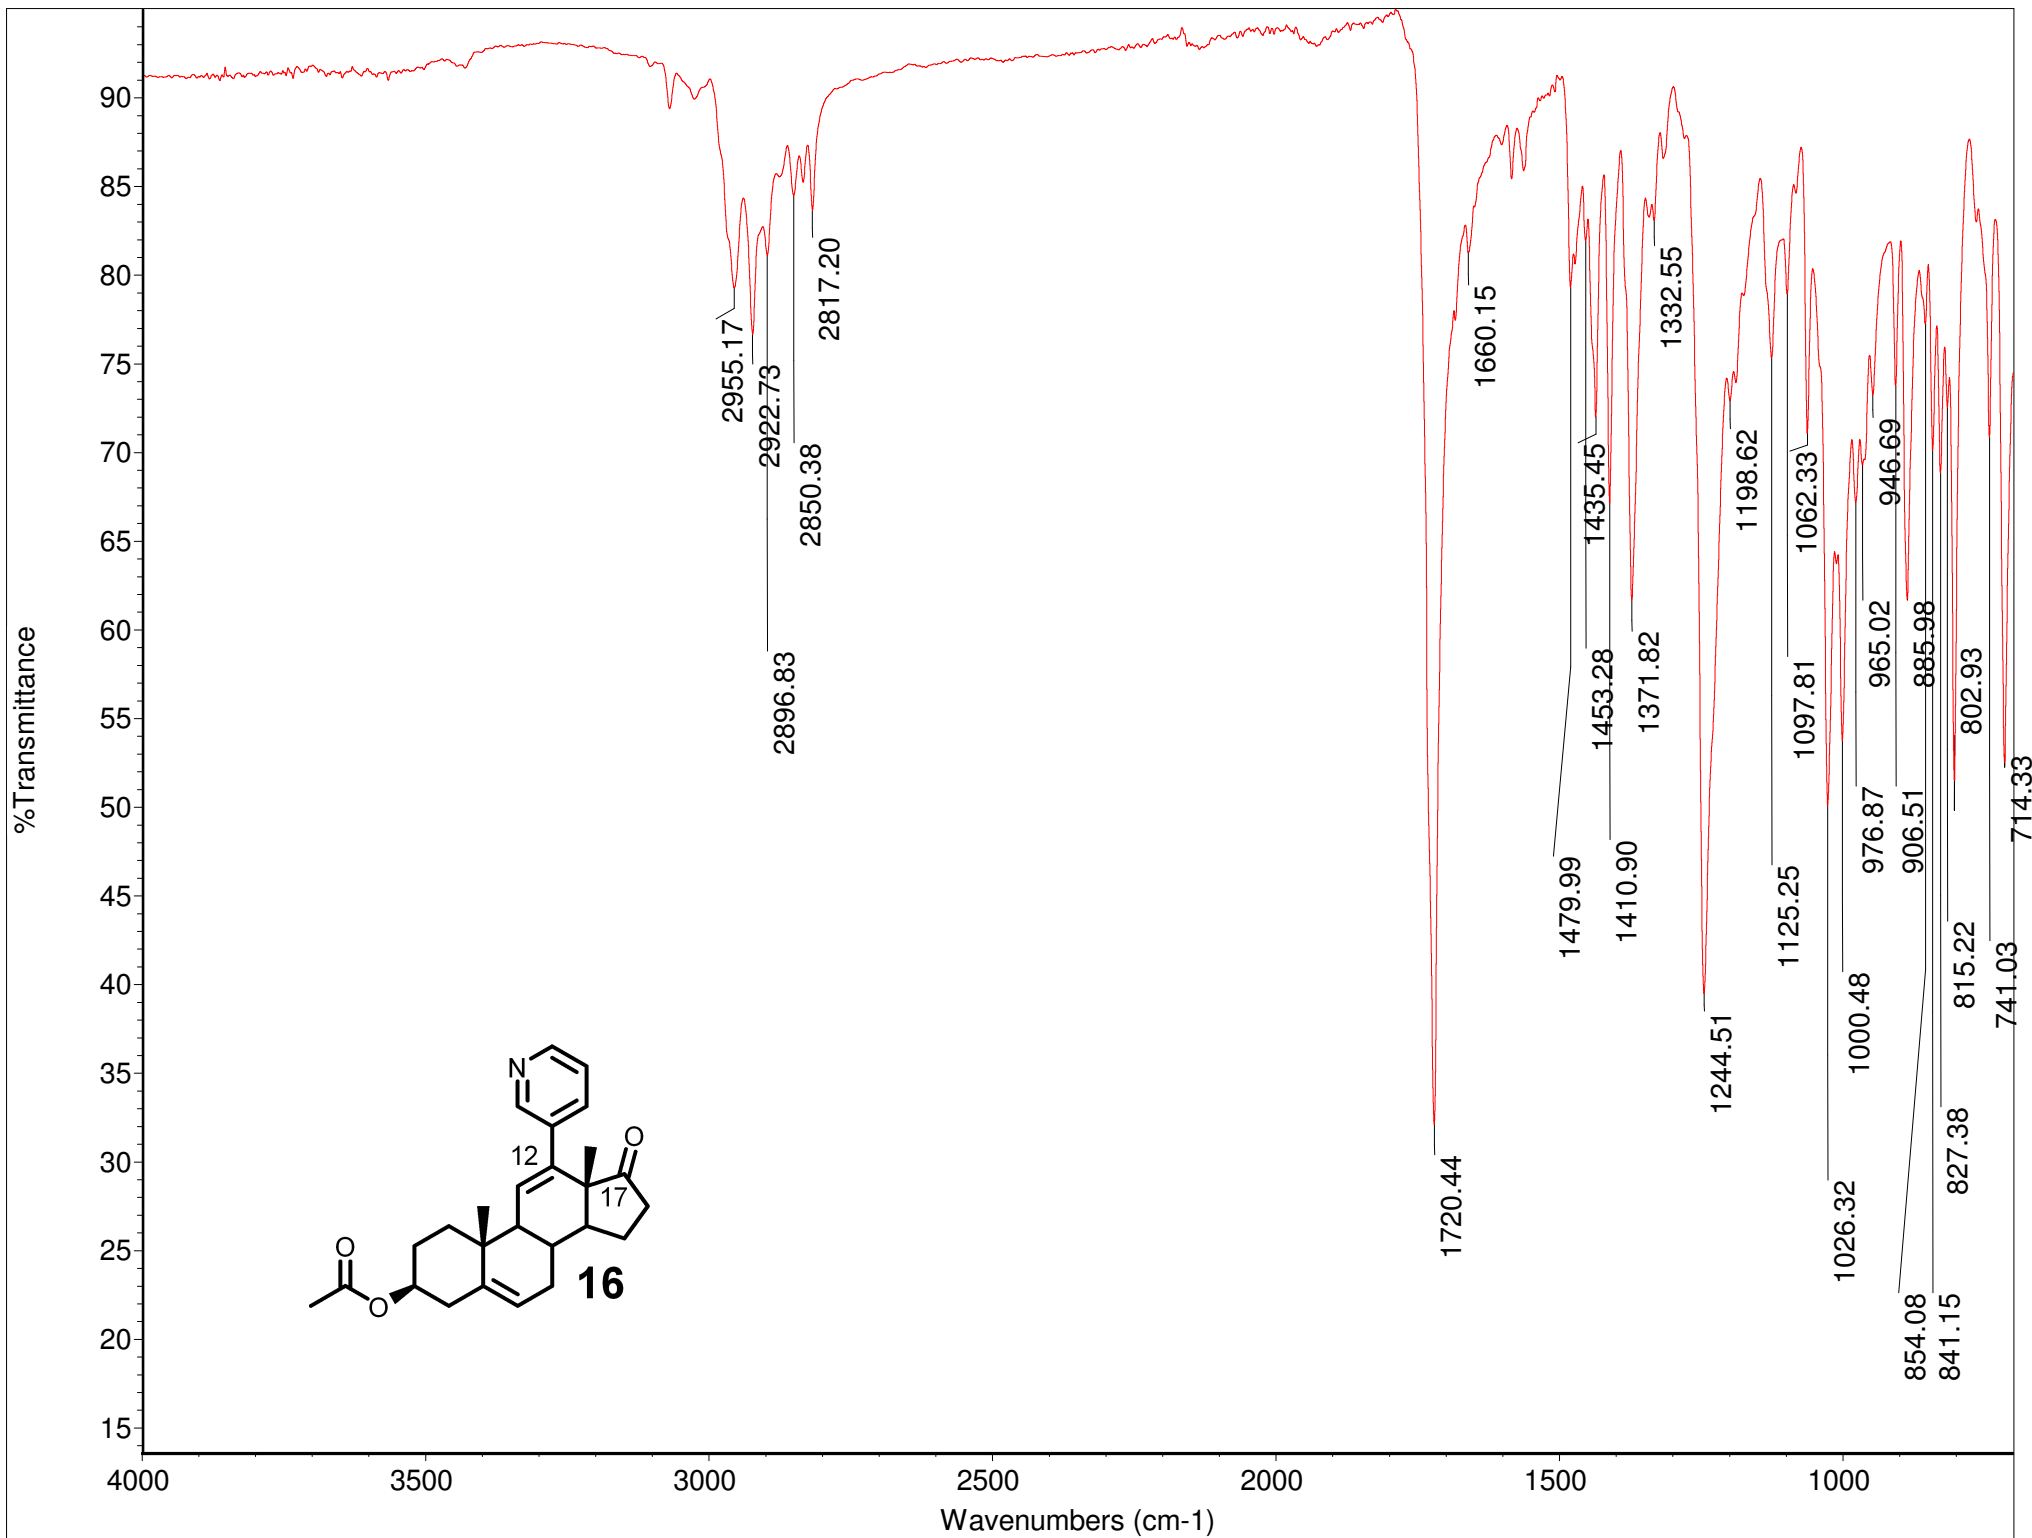

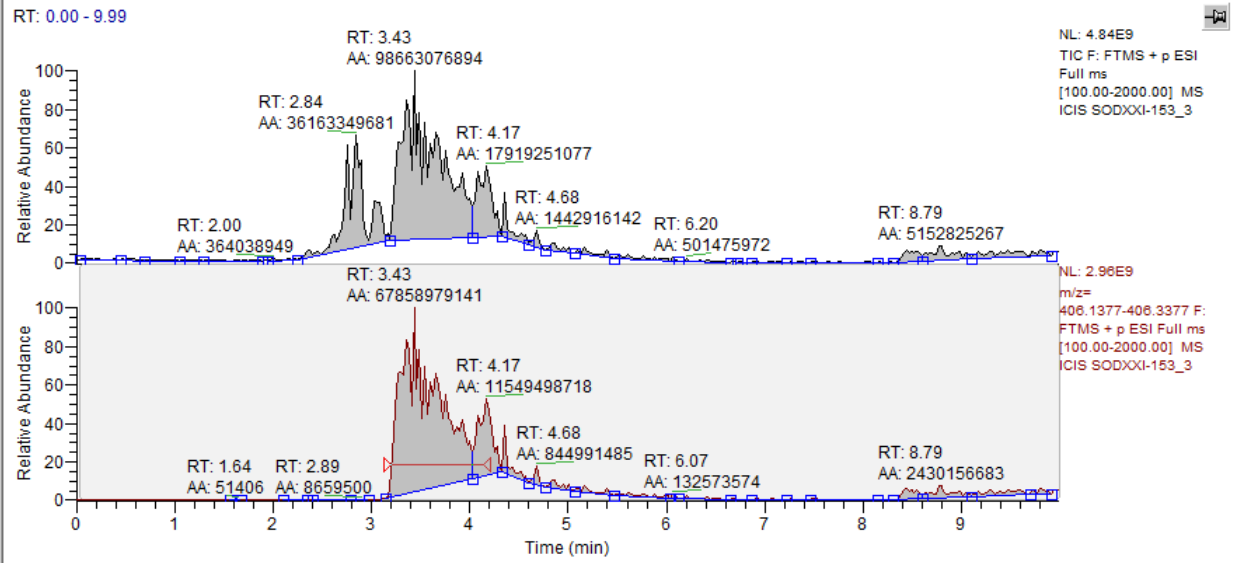

SODXXI-153\_3 #119-154 RT: 3.19-4.14 AV: 36 NL: 1.30E9  
 F: FTMS + p ESI Full ms [100.00-2000.00]

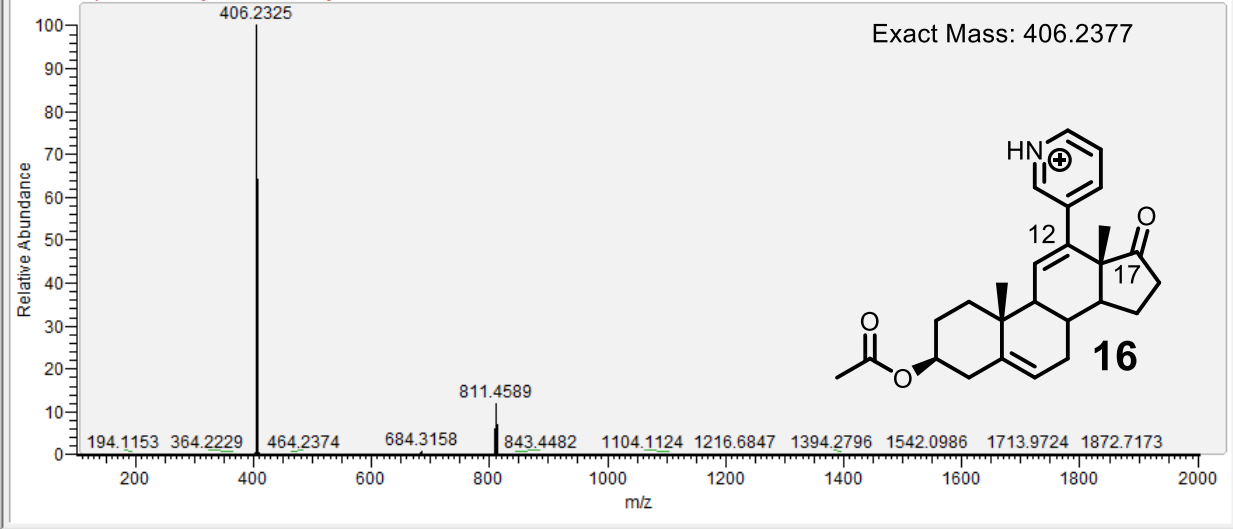

Original O.R. : -0.094\*

O.R. \*

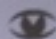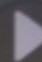

-0.094

0.0  
10-05 08:29  
zero

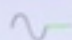

Temp. : 21.6°C ↓ 21.5°C

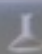

| WLG    | Cell     |     | ATC  |
|--------|----------|-----|------|
| 589.44 | 1.0000dm |     | 20.0 |
| Mode   | Times    | GLP |      |
| single | 1        | off |      |
| menu   |          |     | save |

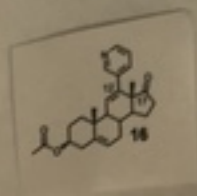

18.5mg -0.094  
-----  
10ml

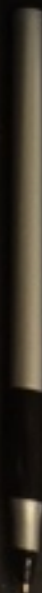



8.466  
 8.466  
 7.771  
 7.555  
 7.314  
 7.313  
 7.310  
 5.600  
 5.596  
 5.520  
 5.509  
 4.684  
 4.675  
 4.665  
 2.696  
 2.693  
 2.688  
 2.682  
 2.677  
 2.674  
 2.668  
 2.664  
 2.631  
 2.627  
 2.620  
 2.618  
 2.614  
 2.612  
 2.607  
 2.599  
 2.486  
 2.469  
 2.447  
 2.430  
 2.412  
 2.408  
 2.402  
 2.399  
 2.284  
 2.201  
 2.183  
 2.170  
 2.167  
 2.163  
 2.145  
 2.133  
 2.054  
 2.046  
 2.041  
 2.030  
 2.023  
 1.255  
 1.063  
 0.066

F2 - Acquisition Parameters  
 Date\_ 20210930  
 Time 23:11 H  
 INSTRUM spect  
 PROBHD Z149001\_0004 (   
 PULPROG zg30  
 TD 32768  
 SOLVENT CDCl3  
 NS 8  
 DS 0  
 SWH 10000.000 Hz  
 FIDRES 0.610352 Hz  
 AQ 1.6384000 sec  
 RG 52.93  
 DW 50.000 usec  
 DE 10.00 usec  
 TE 298.1 K  
 D1 1.00000000 sec  
 TD0 1  
 SFO1 500.1330883 MHz  
 NUC1 1H  
 PO 4.27 usec  
 P1 12.81 usec  
 PLW1 19.99900055 W  
 F2 - Processing parameters  
 SI 65536  
 SF 500.1300121 MHz  
 WDW EM  
 SSB 0  
 LB 0.30 Hz  
 GB 0  
 PC 1.00

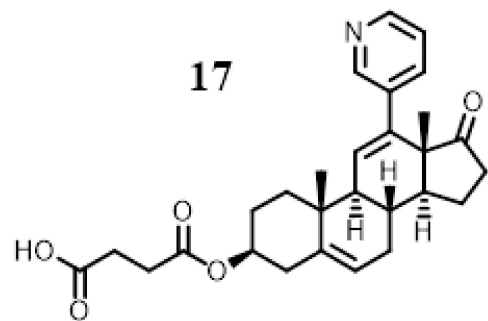

9.0 8.5 8.0 7.5 7.0 6.5 6.0 5.5 5.0 4.5 4.0 3.5 3.0 2.5 2.0 1.5 1.0 0.5 0.0 ppm

1.88  
 0.92  
 0.88  
 0.96  
 1.00  
 1.25  
 4.15  
 1.94  
 0.97  
 2.11  
 5.67  
 1.07  
 1.95  
 4.00  
 2.86

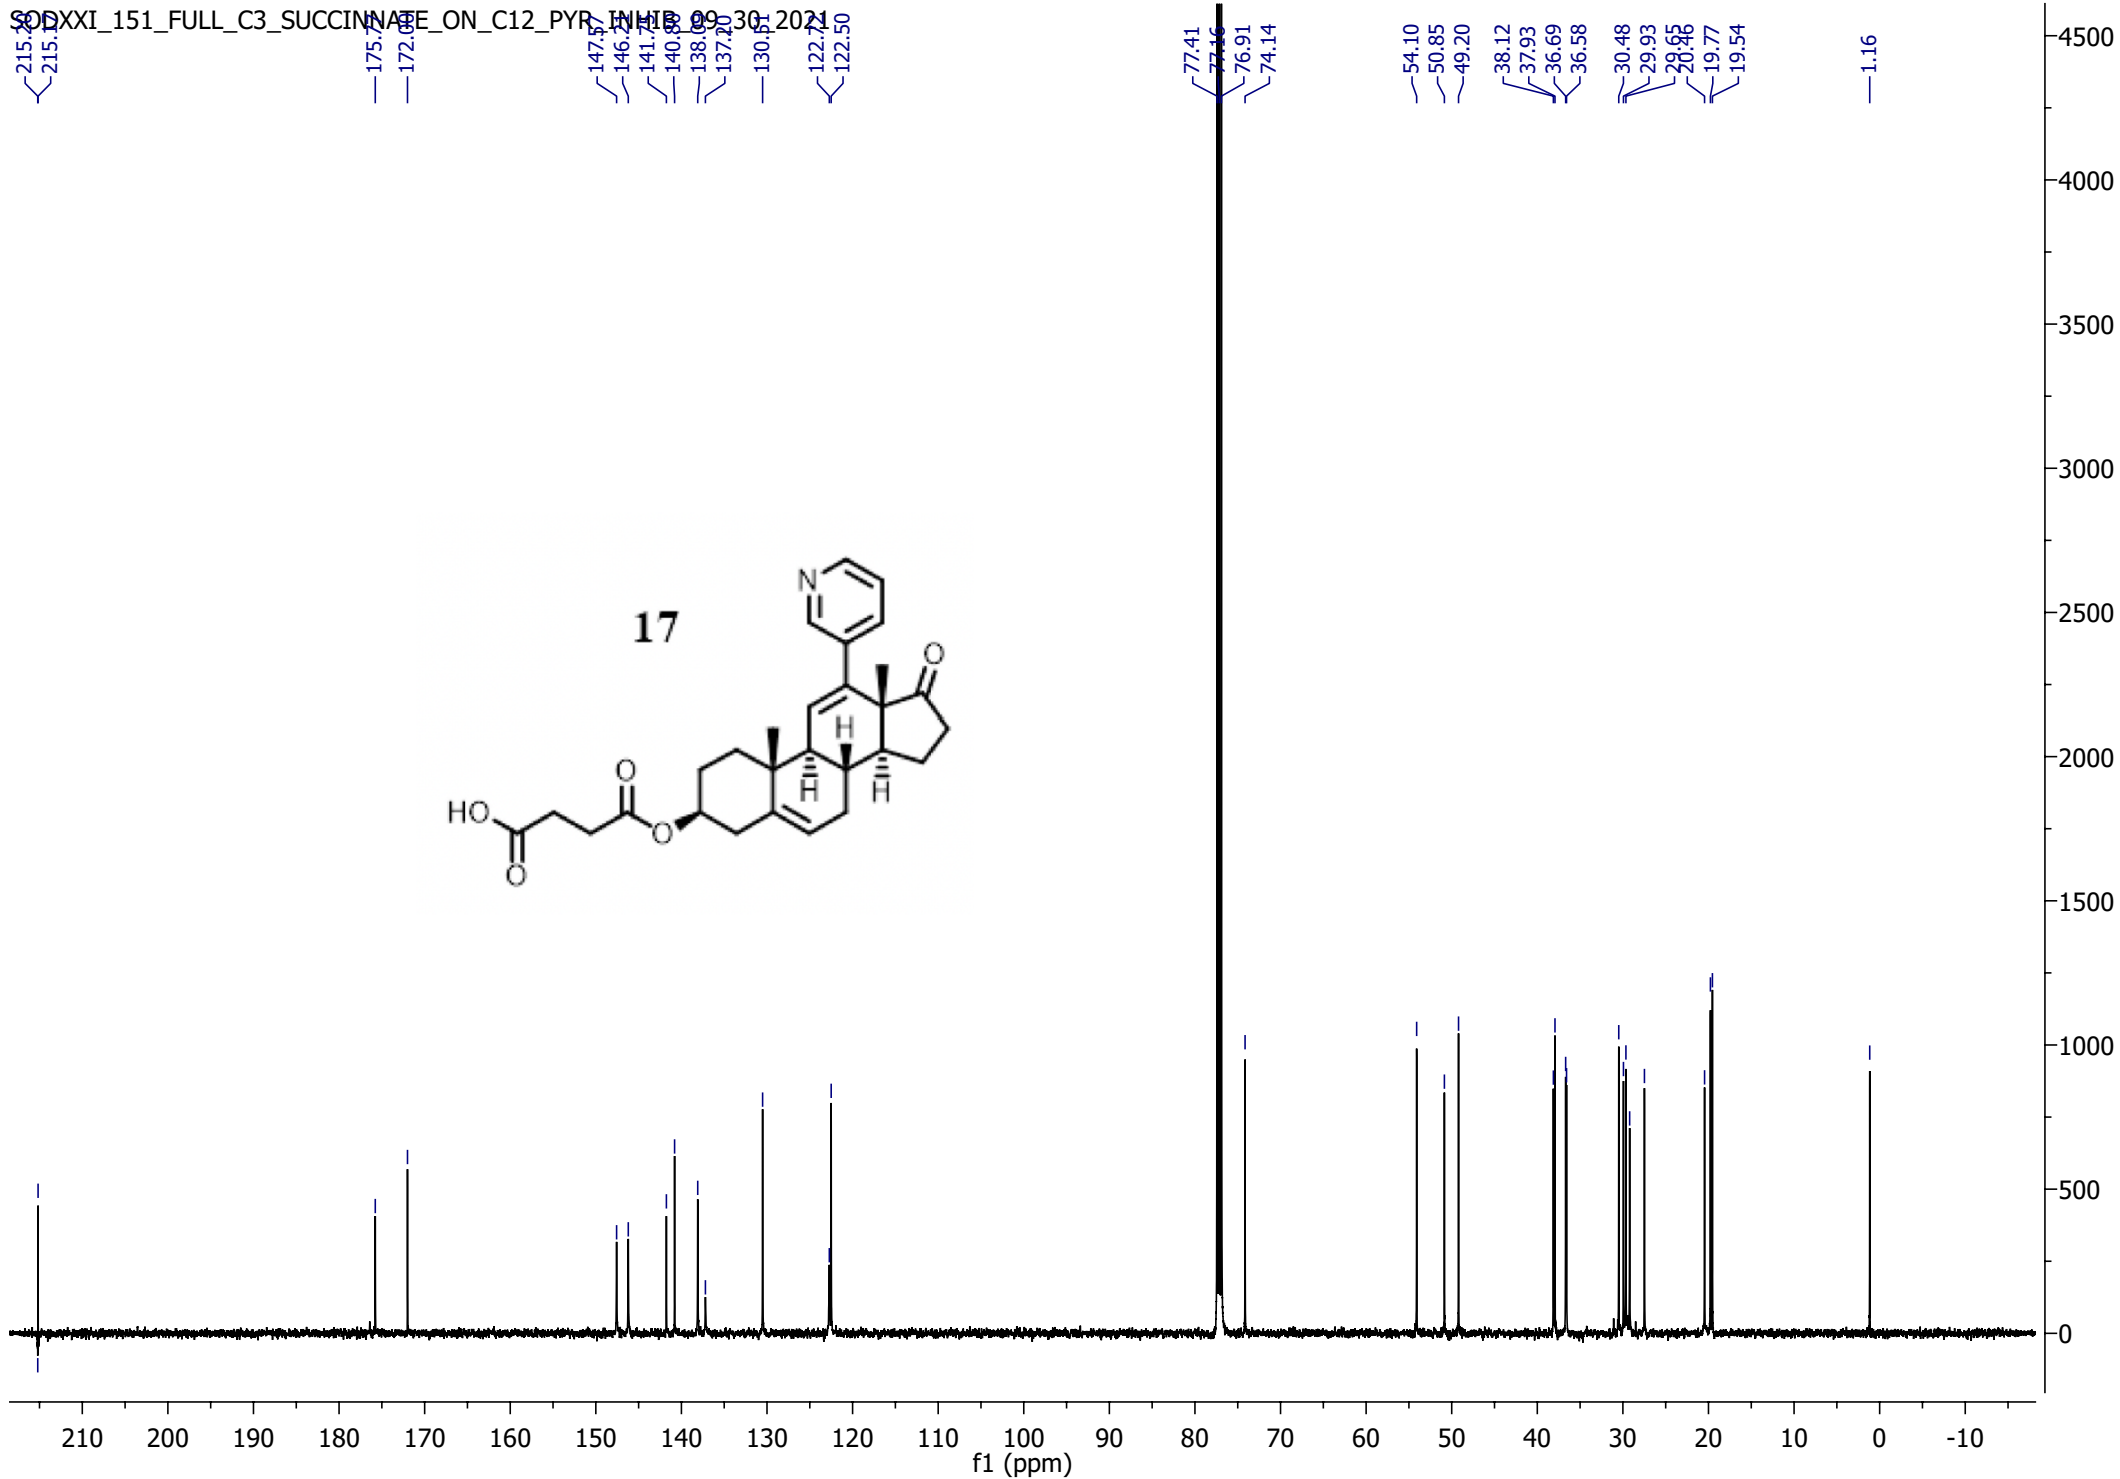

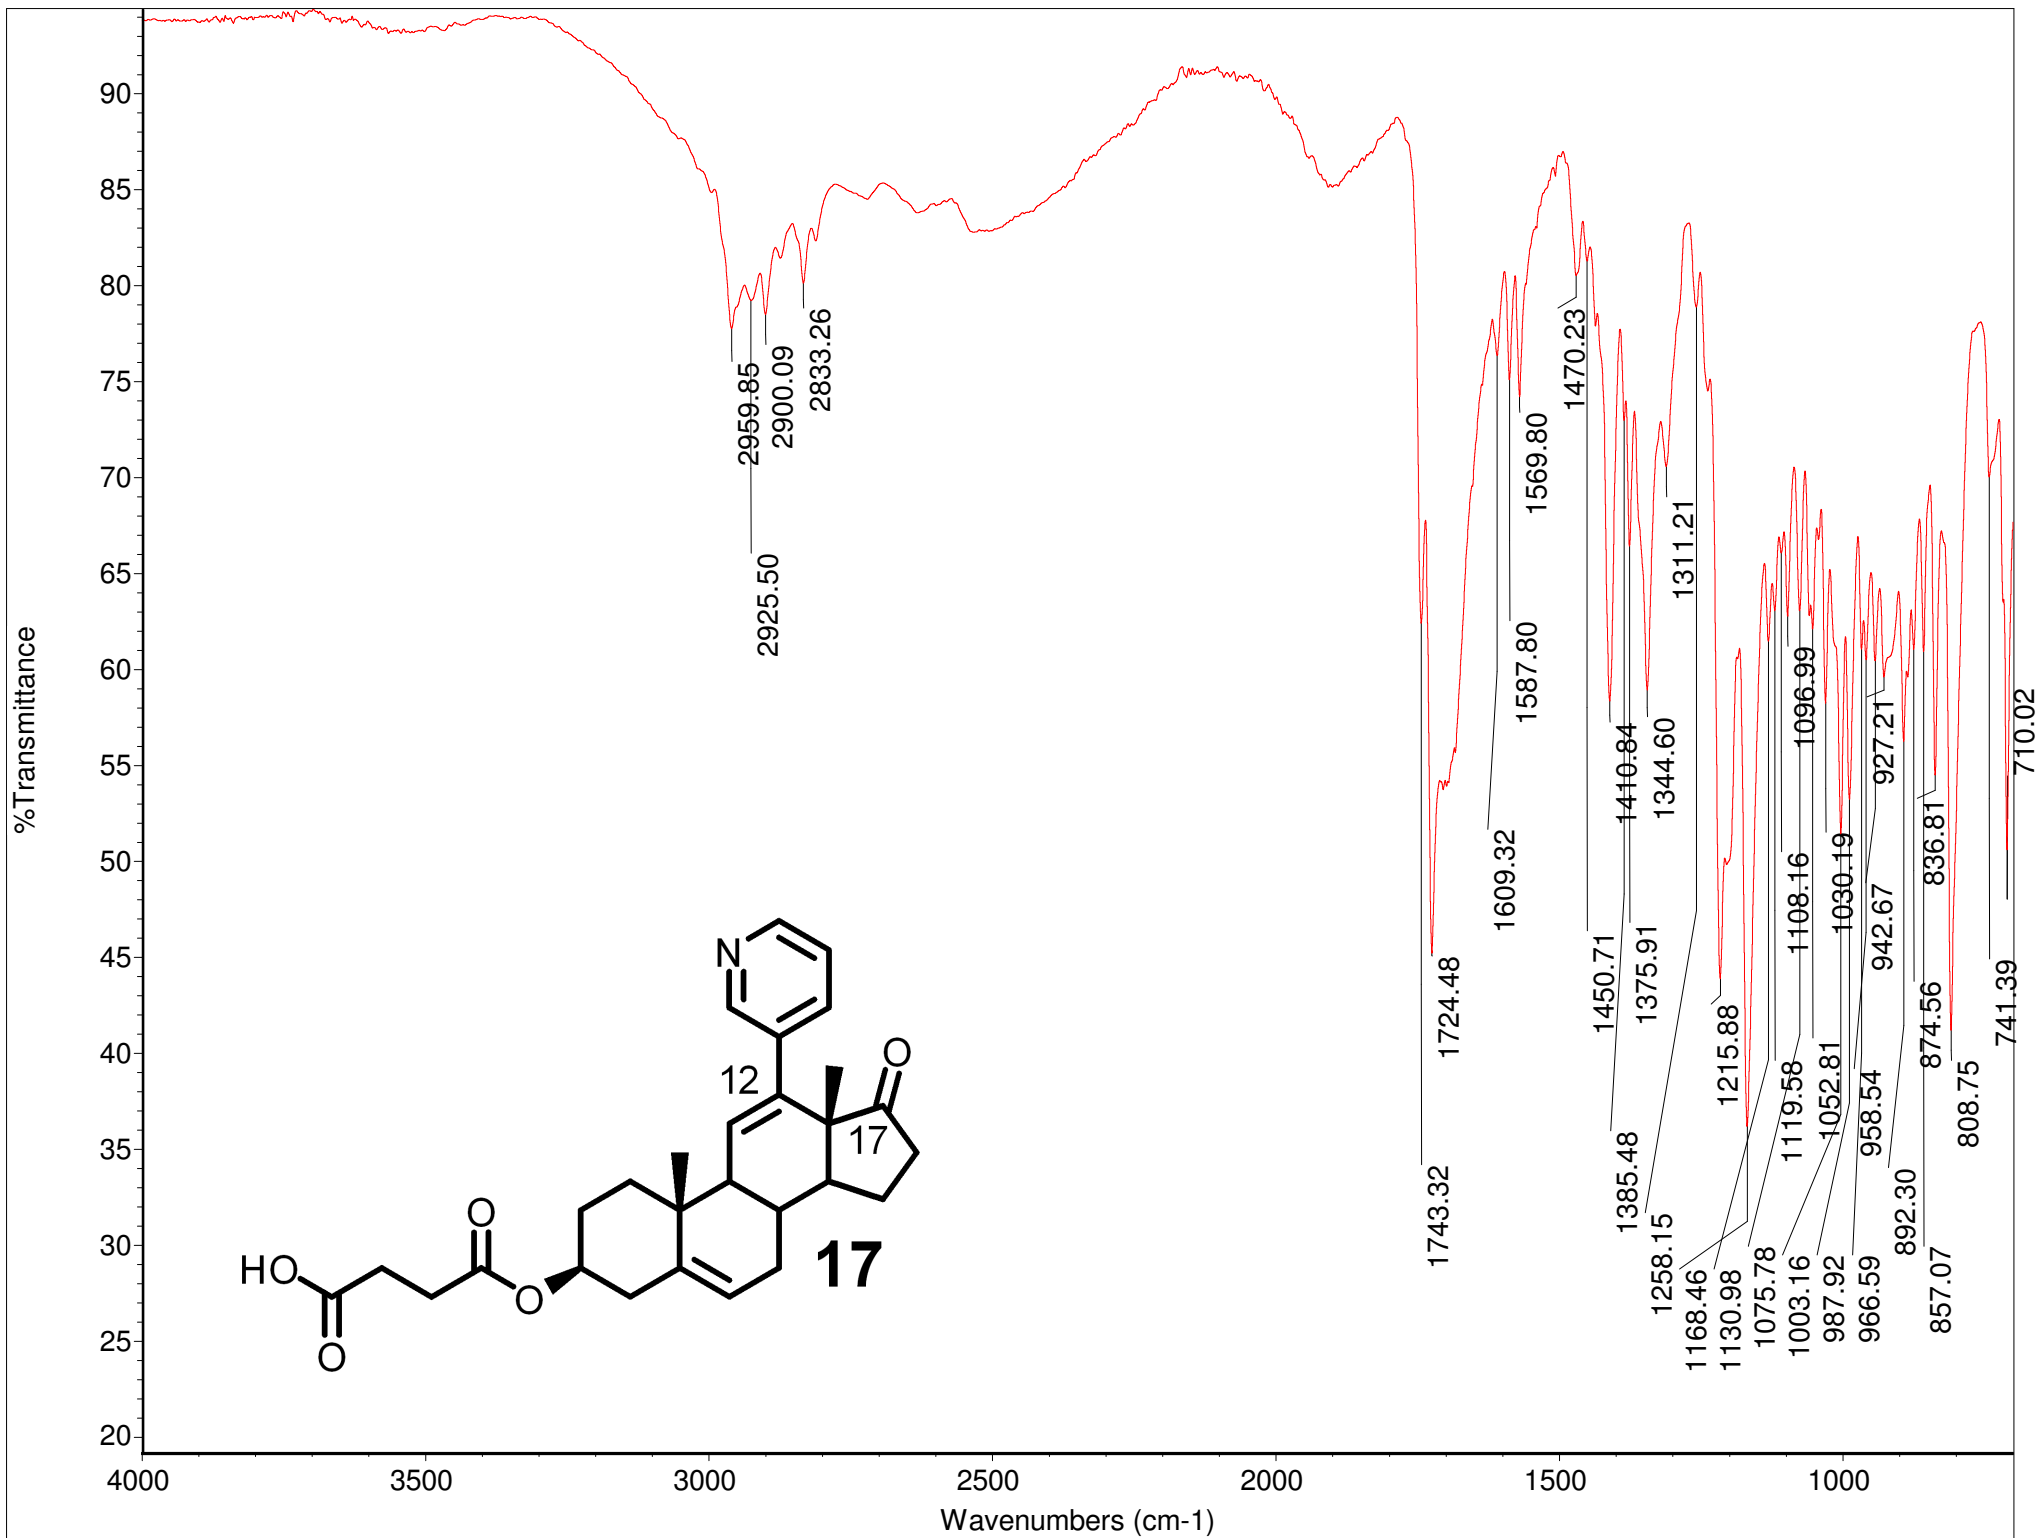

RT: 0.00 - 10.00

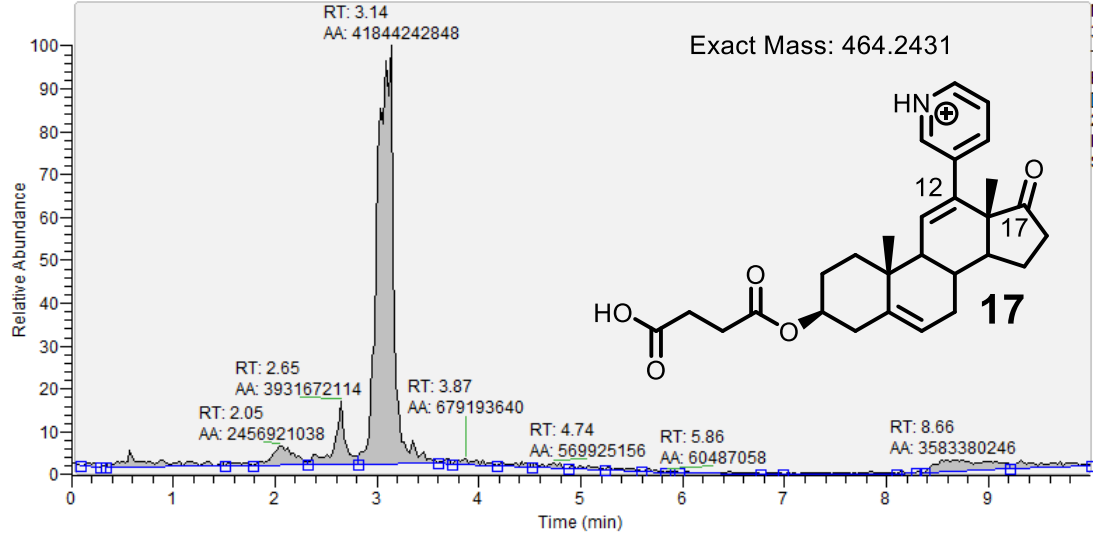

NL: 3.70E9  
TIC F: FTMS + p  
ESI Full ms  
[100.00-2000.00] MS  
ICIS  
SODXXI-153\_1

SODXXI-153\_1 #109-119 RT: 2.92-3.19 AV: 11 NL: 1.25E9

F: FTMS + p ESI Full ms [100.00-2000.00]

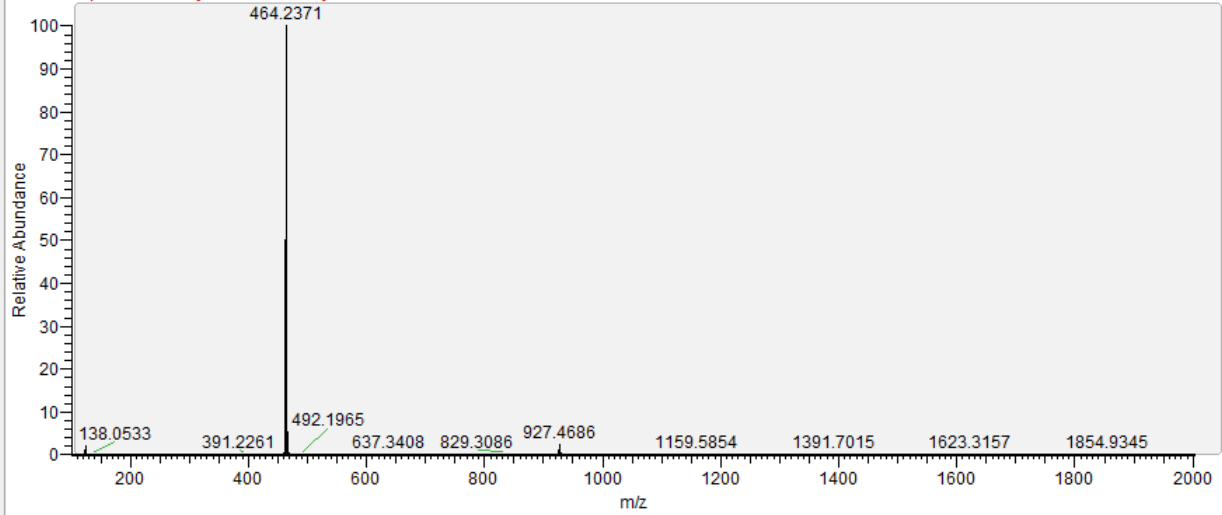

NUM

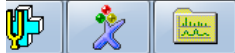

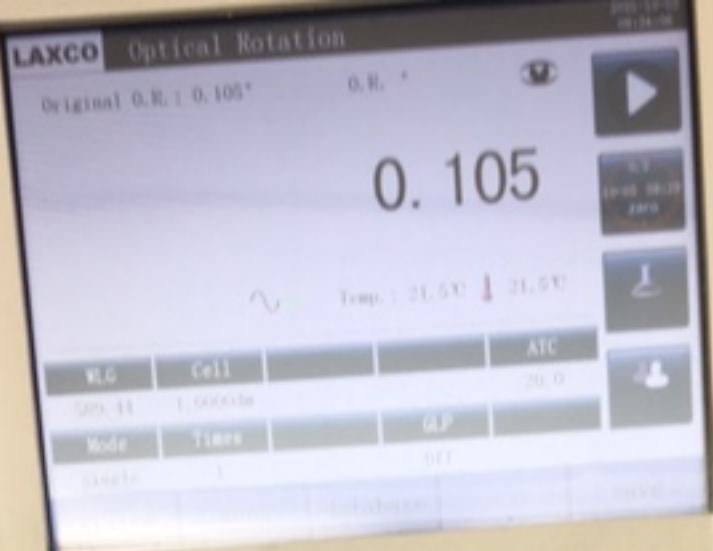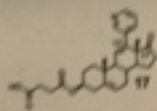

$$\frac{140 \mu\text{g}}{10 \mu\text{g}}$$
 0.105

**Table S1:** Crystallographic data and structure refinement for **compound 16**

|                                                        |                                                 |
|--------------------------------------------------------|-------------------------------------------------|
| Identification code                                    | Compound 16                                     |
| Empirical formula                                      | C <sub>26</sub> H <sub>31</sub> NO <sub>3</sub> |
| Formula weight                                         | 405.52                                          |
| Crystal system                                         | Monoclinic                                      |
| Space group                                            | <i>P2<sub>1</sub></i>                           |
| <i>a</i> (Å)                                           | 8.3667(2)                                       |
| <i>b</i> (Å)                                           | 12.9356(2)                                      |
| <i>c</i> (Å)                                           | 10.5610(2)                                      |
| <i>α</i> (°)                                           | 90                                              |
| <i>β</i> (°)                                           | 113.026(2)                                      |
| <i>γ</i> (°)                                           | 90                                              |
| Volume (Å <sup>3</sup> )                               | 1051.93(5)                                      |
| <i>Z</i>                                               | 2                                               |
| <i>ρ</i> (calc.)                                       | 1.280                                           |
| <i>λ</i>                                               | 1.54184                                         |
| Temp. (K)                                              | 100.0(1)                                        |
| F(000)                                                 | 436                                             |
| <i>μ</i> (mm <sup>-1</sup> )                           | 0.655                                           |
| T <sub>min</sub> , T <sub>max</sub>                    | 0.378, 1.000                                    |
| 2 $\theta$ <sub>range</sub> (°)                        | 9.10 to 152.8                                   |
| Reflections collected                                  | 6891                                            |
| Independent reflections                                | 3400<br>[R(int) = 0.0267]                       |
| Completeness                                           | 97.3%                                           |
| Data / restraints / parameters                         | 3400 / 1 / 275                                  |
| Observed data<br>[ <i>I</i> > 2 $\sigma$ ( <i>I</i> )] | 3293                                            |
| <i>wR</i> ( <i>F</i> <sup>2</sup> all data)            | 0.0800                                          |
| <i>R</i> ( <i>F</i> obsd data)                         | 0.0306                                          |
| Goodness-of-fit on <i>F</i> <sup>2</sup>               | 1.06                                            |
| largest diff. peak and hole (e Å <sup>-3</sup> )       | 0.19 / -0.13                                    |

$$wR_2 = \{ \Sigma [w(F_o^2 - F_c^2)^2] / \Sigma [w(F_o^2)^2] \}^{1/2}$$

$$R_1 = \Sigma ||F_o| - |F_c|| / \Sigma |F_o|$$

## checkCIF/PLATON report

Structure factors have been supplied for datablock(s) hpd326

THIS REPORT IS FOR GUIDANCE ONLY. IF USED AS PART OF A REVIEW PROCEDURE FOR PUBLICATION, IT SHOULD NOT REPLACE THE EXPERTISE OF AN EXPERIENCED CRYSTALLOGRAPHIC REFEREE.

No syntax errors found.      CIF dictionary      Interpreting this report

### Datablock: hpd326

---

Bond precision:    C-C = 0.0032 A                      Wavelength=1.54184

Cell:                      a=8.36666(17)              b=12.93557(19)              c=10.5610(2)  
                                    alpha=90                      beta=113.026(2)              gamma=90

Temperature:              100 K

|                        | Calculated   | Reported     |
|------------------------|--------------|--------------|
| Volume                 | 1051.93(4)   | 1051.93(4)   |
| Space group            | P 21         | P 1 21 1     |
| Hall group             | P 2yb        | P 2yb        |
| Moiety formula         | C26 H31 N O3 | C26 H31 N O3 |
| Sum formula            | C26 H31 N O3 | C26 H31 N O3 |
| Mr                     | 405.52       | 405.52       |
| Dx, g cm <sup>-3</sup> | 1.280        | 1.280        |
| Z                      | 2            | 2            |
| Mu (mm <sup>-1</sup> ) | 0.655        | 0.655        |
| F000                   | 436.0        | 436.0        |
| F000'                  | 437.24       |              |
| h, k, lmax             | 10, 16, 13   | 10, 16, 12   |
| Nref                   | 4430 [ 2317] | 3400         |
| Tmin, Tmax             | 0.885, 0.940 | 0.378, 1.000 |
| Tmin'                  | 0.877        |              |

Correction method= # Reported T Limits: Tmin=0.378 Tmax=1.000  
AbsCorr = GAUSSIAN

Data completeness= 1.47/0.77                      Theta(max)= 76.376

R(reflections)= 0.0306( 3293)

wR2(reflections)=  
0.0800( 3400)

S = 1.062

Npar= 275

---

The following ALERTS were generated. Each ALERT has the format

**test-name\_ALERT\_alert-type\_alert-level.**

Click on the hyperlinks for more details of the test.

---

● **Alert level C**

|                   |                                                  |       |        |
|-------------------|--------------------------------------------------|-------|--------|
| PLAT029_ALERT_3_C | _diffn_measured_fraction_theta_full value Low .  | 0.973 | Why?   |
| PLAT911_ALERT_3_C | Missing FCF Refl Between Thmin & STh/L= 0.600    | 53    | Report |
| PLAT915_ALERT_3_C | No Flack x Check Done: Low Friedel Pair Coverage | 61    | %      |

---

● **Alert level G**

|                   |                                                  |               |      |        |
|-------------------|--------------------------------------------------|---------------|------|--------|
| PLAT791_ALERT_4_G | Model has Chirality at C3                        | (Sohnke SpGr) | S    | Verify |
| PLAT791_ALERT_4_G | Model has Chirality at C8                        | (Sohnke SpGr) | R    | Verify |
| PLAT791_ALERT_4_G | Model has Chirality at C9                        | (Sohnke SpGr) | R    | Verify |
| PLAT791_ALERT_4_G | Model has Chirality at C10                       | (Sohnke SpGr) | R    | Verify |
| PLAT791_ALERT_4_G | Model has Chirality at C13                       | (Sohnke SpGr) | R    | Verify |
| PLAT791_ALERT_4_G | Model has Chirality at C14                       | (Sohnke SpGr) | S    | Verify |
| PLAT912_ALERT_4_G | Missing # of FCF Reflections Above STh/L= 0.600  | 136           | Note |        |
| PLAT941_ALERT_3_G | Average HKL Measurement Multiplicity .....       | 3.3           | Low  |        |
| PLAT978_ALERT_2_G | Number C-C Bonds with Positive Residual Density. | 11            | Info |        |

---

- 0 **ALERT level A** = Most likely a serious problem - resolve or explain
- 0 **ALERT level B** = A potentially serious problem, consider carefully
- 3 **ALERT level C** = Check. Ensure it is not caused by an omission or oversight
- 9 **ALERT level G** = General information/check it is not something unexpected

- 0 ALERT type 1 CIF construction/syntax error, inconsistent or missing data
  - 1 ALERT type 2 Indicator that the structure model may be wrong or deficient
  - 4 ALERT type 3 Indicator that the structure quality may be low
  - 7 ALERT type 4 Improvement, methodology, query or suggestion
  - 0 ALERT type 5 Informative message, check
-



It is advisable to attempt to resolve as many as possible of the alerts in all categories. Often the minor alerts point to easily fixed oversights, errors and omissions in your CIF or refinement strategy, so attention to these fine details can be worthwhile. In order to resolve some of the more serious problems it may be necessary to carry out additional measurements or structure refinements. However, the purpose of your study may justify the reported deviations and the more serious of these should normally be commented upon in the discussion or experimental section of a paper or in the "special\_details" fields of the CIF. checkCIF was carefully designed to identify outliers and unusual parameters, but every test has its limitations and alerts that are not important in a particular case may appear. Conversely, the absence of alerts does not guarantee there are no aspects of the results needing attention. It is up to the individual to critically assess their own results and, if necessary, seek expert advice.

### **Publication of your CIF in IUCr journals**

A basic structural check has been run on your CIF. These basic checks will be run on all CIFs submitted for publication in IUCr journals (*Acta Crystallographica*, *Journal of Applied Crystallography*, *Journal of Synchrotron Radiation*); however, if you intend to submit to *Acta Crystallographica Section C* or *E* or *IUCrData*, you should make sure that full publication checks are run on the final version of your CIF prior to submission.

### **Publication of your CIF in other journals**

Please refer to the *Notes for Authors* of the relevant journal for any special instructions relating to CIF submission.

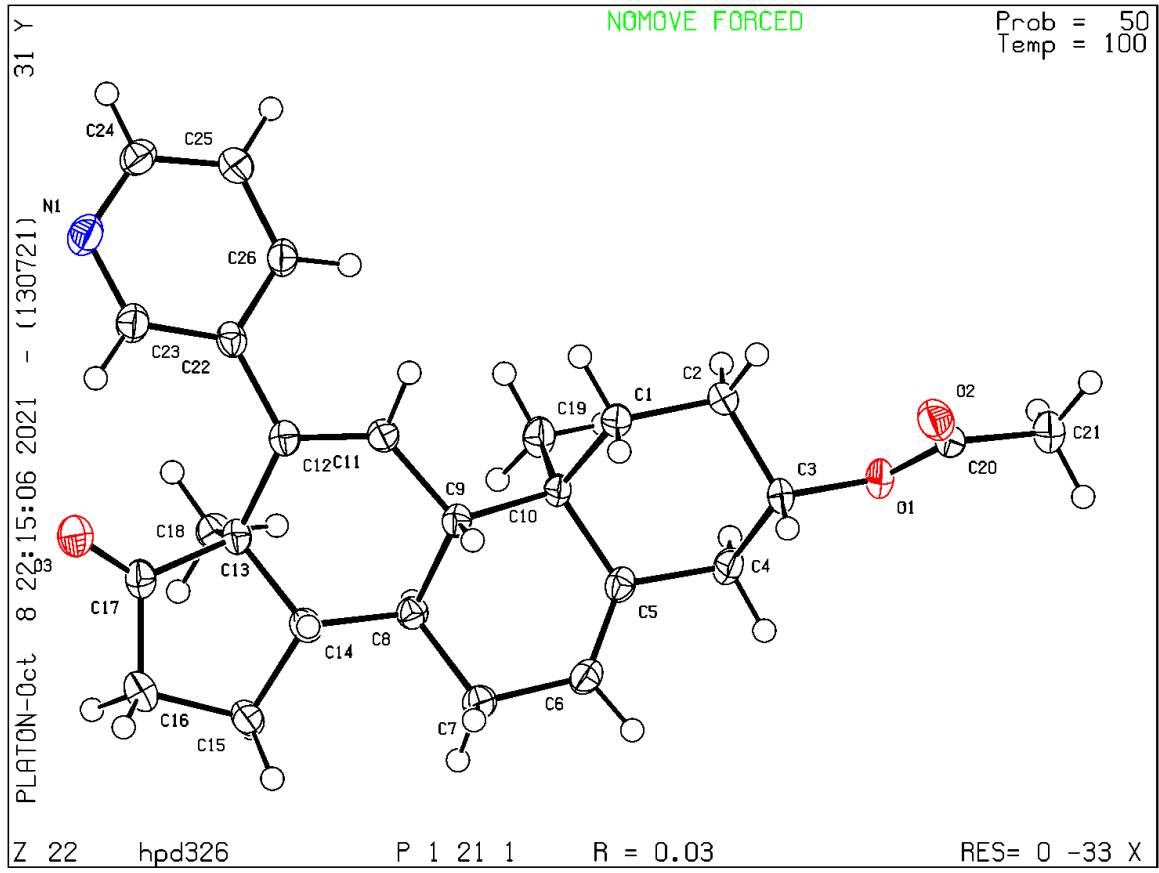

Supplement: NIHMS1786327-supplement-Supplementary_materials.pdf [file NIHMS1786327-supplement-Supplementary_materials.pdf]
